# Supplementary material for: Characterization of the Candida glabrata Transcription Factor CgMar1: Role in Azole Susceptibility
Source: MDPI journal article supplement (doi:10.3390/jof8010061), 2022-01-07
Supplement: s1 [file s1]

Supplementary Table S4 – Fluconazole susceptibility profiles determined by MIC values in the deletion mutant for *CgRSB1* and the corresponding parental strain.

| <b>Strain</b>  | <b>Fluconazole MIC<br/>(mg/L)</b> |
|----------------|-----------------------------------|
| WT             | 16                                |
| <i>Δcgrsb1</i> | 8                                 |
