# Supplementary material for: Characterization of the Candida glabrata Transcription Factor CgMar1: Role in Azole Susceptibility
Source: MDPI journal article supplement (doi:10.3390/jof8010061), 2022-01-07
Supplement: s1 [file s1]

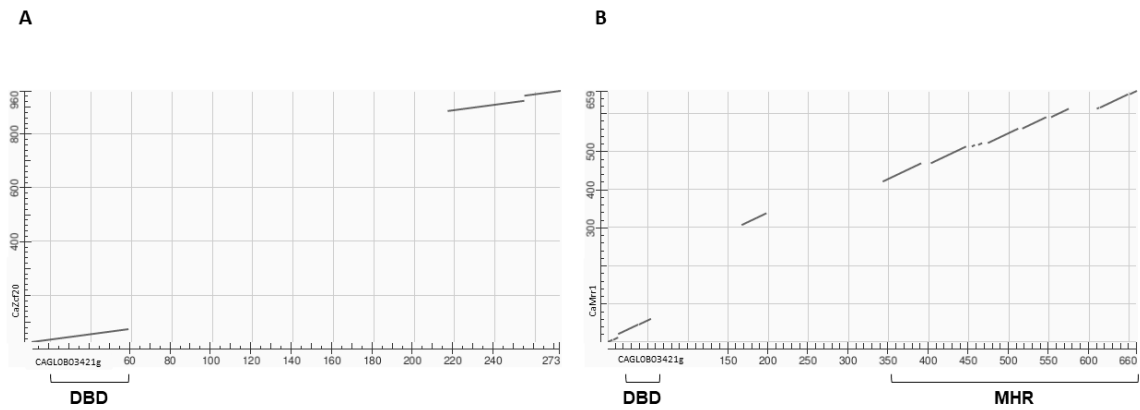

Figure S1: Dot plot depicting the alignment results for the *C. glabrata* protein encoded by ORF CAGL0B03421g. (A) Blastp alignment result between the proteins encoded by CAGL0B03421g (*C. glabrata*) and CaZCF20 (*C. albicans*). Conserved domains and their positions are indicated at the bottom of the dot plot. (B) Blastp alignment result between the proteins encoded by CAGL0B03421g (*C. glabrata*) and CaMRR1 (*C. albicans*). Conserved domains and their positions are indicated at the bottom of the dot plot.

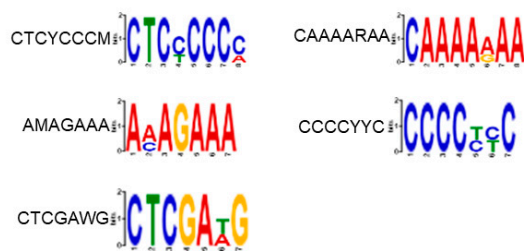

Figure S2: Assessment of 24 h biofilm formation was performed by Violet Crystal in microtiter plates of the deletion mutant for CgMAR1 and the corresponding parental strain.

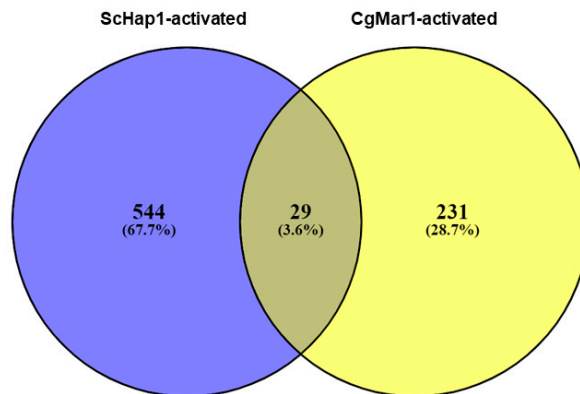

Figure S3: Consensus found to be overrepresented in the promoters of CgMar1-activated genes, as found by the DREME tool. The sequences shown correspond to the motifs outputted by DREME, excluding TATA box motifs.

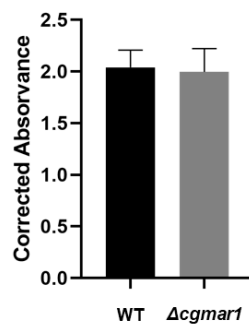

Figure S4: Comparison of the activated regulons between ScHap1 (blue) and CgMar1 (yellow), irrespective of experimental condition. The regulon of ScHap1 was retrieved from the PathoYeast database and the *C. glabrata* homologs used for the comparison
