# Supplementary material for: Characterization of the Candida glabrata Transcription Factor CgMar1: Role in Azole Susceptibility
Source: MDPI journal article supplement (doi:10.3390/jof8010061), 2022-01-07
Supplement: s1 [file s1]

Supplementary Table S1 – List of primers used in this study.

| Primer                                                       | Sequence                                                                                                                                                                       |
|--------------------------------------------------------------|--------------------------------------------------------------------------------------------------------------------------------------------------------------------------------|
| Deletion of <i>CgMARI</i>                                    | 5'-<br>TTTACATCTCTACTAGCTGTTTCGATTTAAGTATTCGCTATACTCACTGT<br>ACCCGGCCCGCTGATCACG-3'<br>5'-<br>AATTGTATTATATATATATATGACTGTGGAAAAATTAATACACAAACA<br>TAACAAATGCCATCGTGAGGCTGG-3'  |
| Confirmation of <i>CgMARI</i> deletion                       | 5'-CCACTACAACAATACCAGGA-3'<br>5'-GAGTTCGTCATAATCGTGTTTC-3'                                                                                                                     |
| Deletion of <i>CgHAPI</i>                                    | 5'-<br>AAAGAGCCATTTTATATTGCAAAGAGAGGAACAATAATCTACGGATCTA<br>AATCCTGGGCCGCTGATCACG-3'<br>5'-<br>CACAATTAATATTATATATCCTTTCTAAAGCCTGATTATATTCCACTAA<br>GAATTACATCGTGAGGCTGG-3'    |
| Confirmation of <i>CgHAPI</i> deletion                       | 5'-GCGATGTATGCGTTGCCT-3'<br>5'-GTCACATCGGTCAGAGAGT-3'                                                                                                                          |
| Deletion of <i>CgRSBI</i>                                    | 5'-<br>TGATGGATGAGGTGGTGGAAAAATTCACGTTTGATCCACTCTCGTATTAT<br>TCGGGGGGCCGCTGATCACG-3'<br>5'-<br>AAATGAGATTAAAGCCGAGTTCCTTGATTTTGATGAAAAGTTTTTGCCAT<br>CCTTTACATCGTGAGGCTGG-3'   |
| Confirmation of <i>CgRSBI</i> deletion                       | 5'-<br>CCCAAGCTGAGGTTCAATG-3'<br>5'-<br>CATGGAGGCAAGCTGAAT-3'                                                                                                                  |
| Cloning of <i>CgMARI</i> in pGREG576                         | 5'-<br><u>GAATTCGATATCAAGCTTATCGATACCGTCGACAATGAGTACCACTACAAC</u><br><u>AATACC-3'</u><br>5'-<br><u>GCGTGACATAACTAATTACATGACTCGAGGTCGACCTACTCCCAGATTGA</u><br><u>GCCAATG-3'</u> |
| Cloning of <i>CgPDC1</i> promoter in pGREG576- <i>CgMARI</i> | 5'-<br><u>TTAACCTCACTAAAGGGAACAAAAGCTGGAGCTCAGCATTTTTATACAC</u><br><u>GTTTTAC-3'</u><br>5'-<br><u>GAAAAGTTCTTCTCCTTACTCATACTAGTGCGGCTGTTAATGTTTTTGGC</u><br><u>AATTG-3'</u>    |
| Cloning of <i>CgURA3</i> gRNA in pV1382                      | 5'-GATCGACCGCCAAGGTATCGTCACG-3'<br>5'-AAAACGTGACGATACCTTGGCCGGTC-3'                                                                                                            |
| Cloning of <i>CgRSBI</i> promoter in pYEP354                 | 5'-CCGGAATTCGTACACAAGCAGCTAGGTAAT-3'<br>5'-AACTGCAGCTCATCCATCATTAGTTATT-3'                                                                                                     |
| Mutagenesis of possible                                      | 5'-CTCAGAAATTGGGGTTGGGGGGGAGGGATG-3'<br>5'-CATCCCTCCCCCAACCCAATTTCTGAG-3'                                                                                                      |

|                                                          |                                                                                         |
|----------------------------------------------------------|-----------------------------------------------------------------------------------------|
| CgMar1 consensus A                                       |                                                                                         |
| Mutagenesis of possible CgMar1 consensus B               | 5'-GAAATTGGGGGAGGGGGTGGGATGAGGTGGAAGTG-3'<br>5'-CACTTCCACCTCATCCCAACCCCCCTCCCCCAATTC-3' |
| Mutagenesis of possible CgMar1 consensus A + consensus B | 5'-CTCAGAAATTGGGGTGGGGGGTGGGATG-3'<br>5'-CATCCCAACCCCCAACCCCAATTTCTGAG-3'               |
| <i>LacZ</i> expression measurement                       | 5'-TGGCTGGAGTGCGATCTTC-3'<br>5'-CGTGCATCTGCCAGTTTGAC-3'                                 |
| <i>CgRDN25</i> expression measurement                    | 5'-AACAACTCACCGGCCGAAT-3'<br>5'-CAAGCGTGTTACCTATACTCCGCCGTCA-3'                         |
| Quantification of consensus A+B by ChIP-RT-PCR           | 5'-AGGGCATTGATGAGATCTGG-3'<br>5'-GTCTGGCTTGCTTCCTTGAC-3'                                |
