# Supplementary material for: Characterization of the Candida glabrata Transcription Factor CgMar1: Role in Azole Susceptibility
Source: J Fungi (Basel). 2022 Jan 7;8(1):61. doi: 10.3390/jof8010061 (PMC8779156; doi:10.3390/jof8010061)
Supplement: Supplementary file 1 [file jof-08-00061-s001.zip]

Archive with 5 entries (5 files):
- Figures S1-S4.pdf
- Table_S1.pdf
- Table_S2.xlsx
- Table_S3.xlsx
- Table_S4.pdf
