# Supplementary material for: Characterization of the Candida glabrata Transcription Factor CgMar1: Role in Azole Susceptibility
Source: J Fungi (Basel). 2022 Jan 7;8(1):61. doi: 10.3390/jof8010061 (PMC8779156; doi:10.3390/jof8010061)
Supplement: Supplementary file 1 [file jof-08-00061-s001.zip › Table_S2.xlsx]

## Sheet: Table S2
Supplementary Table S2 - Differentially expressed genes in ∆cgmar1 control/WT control. Green indicates upregulated genes (CgMar1-repressed), red indicates downregulated genes (CgMar1-activated)
Functional Group	Log2 Fold Change	ORF	Name	Function	C. albicans homolog ORF	C. albicans homolog name	C. albicans function	S. cerevisiae homolog ORF	S. cerevisiae homolog name	S. cerevisiae definition	S. cerevisiae function
Drug Resistance	0.814806357493544	CAGL0L10912g		Ortholog(s) have spermidine transmembrane transporter activity, spermine transmembrane transporter activity, role in spermidine transport, spermine transport and fungal-type vacuole membrane, plasma membrane localization	CR_03920C	TPO4	Putative sperimidine transporter; fungal-specific (no human or murine homolog); Spider biofilm induced; promoter bound by Tec1 and Ndt80; Bcr1-repressed in RPMI a/a biofilms	YOR273C	TPO4		Polyamine transporter of the major facilitator superfamily; member of the 12-spanner drug:H(+) antiporter DHA1 family; recognizes spermine, putrescine, and spermidine; localizes to the plasma membrane
	0.76922113579278	CAGL0G08624g	QDR2	Drug:H+ antiporter of the Major Facilitator Superfamily, confers imidazole drug resistance, involved in quinidine/multidrug efflux; gene is activated by Pdr1p; upregulated in azole-resistant strain	CR_04210C	QDR1	Putative antibiotic resistance transporter; regulated by white-opaque switch, Nrg1, Tup1; Hap43, caspofungin repressed; repressed during chlamydospore formation; flow model biofilm induced; Spider biofilm repressed	YIL120W	QDR1	multidrug transporter	Multidrug transporter of the major facilitator superfamily; member of the 12-spanner drug:H(+) antiporter DHA1 family; involved in spore wall assembly; sequence similarity to DTR1 and QDR3, and the triple mutant dtr1 qdr1 qdr3 exhibits reduced dityrosine fluorescence relative to the single mutants; required for resistance to quinidine, ketoconazole, fluconazole, and barban; QDR1 has a paralog, AQ…
	0.696397066663626	CAGL0M01760g	CDR1	Multidrug transporter of ATP-binding cassette (ABC) superfamily, involved in resistance to azoles; expression regulated by Pdr1p; increased abundance in azole resistant strains; expression increased by loss of the mitochondrial genome
	0.596372122581416	CAGL0G00242g	YOR1	Putative ABC transporter involved in multidrug efflux; gene is upregulated in azole-resistant strain	C2_09990C	YOR1	Protein similar to S. cerevisiae Yor1; ABC-type plasma membrane transporter involved in resistance to aureobasidin A; white cell type-specific transcript; Spider biofilm induced	YGR281W	YOR1	ATP-binding cassette transporter YOR1|YRS1	Plasma membrane ATP-binding cassette (ABC) transporter; multidrug transporter mediates export of many different organic anions including oligomycin; homolog of human cystic fibrosis transmembrane receptor (CFTR)
Lipid and Fatty Acid Metabolism	0.941870617004208	CAGL0K00715g	RTA1	Putative protein involved in 7-aminocholesterol resistance; gene is upregulated in azole-resistant strain				YGR213C	RTA1		Protein involved in 7-aminocholesterol resistance; has seven potential membrane-spanning regions; expression is induced under both low-heme and low-oxygen conditions; member of the fungal lipid-translocating exporter (LTE) family of protein; RTA1 has a paralog, YLR046C, that arose from the whole genome duplication
	0.821444820243305	CAGL0D05566g		Ortholog(s) have sterol esterase activity, role in sterol metabolic process and integral component of membrane, lipid particle localization	C2_07440C		Ortholog(s) have sterol esterase activity, role in sterol metabolic process and integral component of membrane, lipid particle localization	YLL012W	YEH1	sterol esterase	Steryl ester hydrolase; one of three gene products (Yeh1p, Yeh2p, Tgl1p) responsible for steryl ester hydrolase activity and involved in sterol homeostasis; localized to lipid particle membranes; YEH1 has a paralog, YEH2, that arose from the whole genome duplication
	0.772595636179013	CAGL0L12892g		Ortholog(s) have role in actin cytoskeleton organization, inositol lipid-mediated signaling, vacuole organization and plasma membrane localization	C4_02720C		Putative plasma membrane protein; Plc1-regulated; Spider biofilm induced	YKL051W	SFK1		Plasma membrane protein that may act to generate normal levels of PI4P; may act together with or upstream of Stt4p; at least partially mediates proper localization of Stt4p to the plasma membrane
	0.609404544266186	CAGL0J03916g		Ortholog(s) have oxysterol binding, sterol transporter activity and role in endocytosis, exocytosis, maintenance of cell polarity, piecemeal microautophagy of nucleus, sterol transport				YOR237W	HES1	oxysterol-binding protein related protein HES1|OSH5	Protein implicated in the regulation of ergosterol biosynthesis; one of a seven member gene family with a common essential function and non-essential unique functions; similar to human oxysterol binding protein (OSBP); SWAT-GFP and mCherry fusion proteins localize to the bud neck and vacuolar membrane; HES1 has a paralog, KES1, that arose from the whole genome duplication
	0.561272950338117	CAGL0M05907g		Ortholog(s) have role in cellular response to oleic acid, negative regulation of transcription from RNA polymerase II promoter and mitochondrion, nucleus localization				YKR064W	OAF3		Putative transcriptional repressor with Zn(2)-Cys(6) finger; negatively regulates transcription in response to oleate levels, based on mutant phenotype and localization to oleate-responsive promoters; the authentic, non-tagged protein is detected in highly purified mitochondria in high-throughput studies; forms nuclear foci upon DNA replication stress
	0.554319471126873	CAGL0E02321g		Putative phospholipase B; predicted GPI-anchor				YOL011W	PLB3	lysophospholipase	Phospholipase B (lysophospholipase) involved in lipid metabolism; hydrolyzes phosphatidylinositol and phosphatidylserine and displays transacylase activity in vitro; PLB3 has a paralog, PLB1, that arose from the whole genome duplication
	0.537631702675118	CAGL0G05313g		Ortholog(s) have transferase activity, transferring phosphorus-containing groups activity	C1_09120W	IPT1	Inositol phosphoryl transferase; catalyzes the synthesis of the most abundant sphingolipid, mannose-(inositol-P)2-ceramide, M(IP)2C, from MIPC; required for wild-type membrane localization of Cdr1; Spider biofilm induced	YDR072C	IPT1	MIC2|inositolphosphotransferase|KTI6|SYR4	Inositolphosphotransferase; involved in synthesis of mannose-(inositol-P)2-ceramide (M(IP)2C), the most abundant sphingolipid; can mutate to resistance to the antifungals syringomycin E and DmAMP1 and to K. lactis zymocin	Transcriptional activator of nitrogen catabolite repression genes; contains a GATA-1-type zinc finger DNA-binding motif; activity and localization regulated by nitrogen limitation and Ure2p; different translational starts produce two major and two minor isoforms that are differentially regulated and localized
	0.527041082800349	CAGL0D03960g		Ortholog(s) have role in lipid homeostasis, mRNA export from nucleus, nuclear envelope organization and endoplasmic reticulum, integral component of membrane, nuclear envelope localization	CR_03930C		Ortholog(s) have role in lipid homeostasis, mRNA export from nucleus, nuclear envelope organization and endoplasmic reticulum, integral component of membrane, nuclear envelope localization	YHR036W	BRL1		Essential nuclear envelope/ER integral membrane protein; interacts and functions with Apq12p and Brr6p in lipid homeostasis; mutants are defective in nuclear pore complex biogenesis, mRNA nuclear export and are sensitive to sterol biosynthesis inhibitors and membrane fluidizing agents; identified as a dosage suppressor of a temperature sensitive mutation in the major karyopherin, CRM1; homologous…
	-0.50626150119265	CAGL0J09394g		Ortholog(s) have alditol:NADP+ 1-oxidoreductase activity, alpha-keto amide reductase activity, alpha-keto ester reductase activity and indole-3-acetaldehyde reductase (NADH) activity, more	C7_03350C		Putative aldose reductase; protein level decreases in stationary phase cultures; Spider biofilm repressed	YDL124W	YDL124W	aldo-keto reductase superfamily protein	NADPH-dependent alpha-keto amide reductase; reduces aromatic alpha-keto amides, aliphatic alpha-keto esters, and aromatic alpha-keto esters; member of the aldo-keto reductase (AKR) family; protein abundance increases in response to DNA replication stress
	-0.513475282167136	CAGL0K01353g		Ortholog(s) have role in intracellular sterol transport and extracellular region, fungal-type vacuole lumen localization	CR_01280C		Ortholog(s) have role in intracellular sterol transport and extracellular region, fungal-type vacuole lumen localization	YDL046W	NPC2	sterol transporter	Sterol transport protein and functional homolog of human NPC2/He1; human NPC2 is a cholesterol-binding protein whose deficiency causes Niemann-Pick type C2 disease involving retention of cholesterol in lysosomes; yeast NPC2 can complement mutations in human NPC2
	-0.521848342229148	CAGL0H01089g		Ortholog(s) have inositol monophosphate 1-phosphatase activity and role in inositol phosphate dephosphorylation				YDR287W	INM2	inositol monophosphate 1-phosphatase INM2	Inositol monophosphatase; involved in biosynthesis of inositol; enzymatic activity requires magnesium ions and is inhibited by lithium and sodium ions; inm1 inm2 double mutant lacks inositol auxotrophy
	-0.581002883181656	CAGL0L11154g		Ortholog(s) have lysophospholipase activity, role in phosphatidylcholine catabolic process, regulation of phospholipid biosynthetic process and endoplasmic reticulum localization	CR_08300C		Putative patatin-like phospholipase; similar to S. cerevisiae Nte1p, which is predicted to be a membrane protein; antigenic during human oral infection; Hap43p-repressed gene	YML059C	NTE1	lysophospholipase	Serine esterase; homolog of human neuropathy target esterase (NTE); Nte1p-mediated phosphatidylcholine turnover influences transcription factor Opi1p localization, affecting transcriptional regulation of phospholipid biosynthesis genes
	-0.591375611390664	CAGL0L10142g	RSB1	Putative sphingolipid flippase; gene is upregulated in azole-resistant strain	C2_06470W	RTA2	Flippase involved in sphingolipid long chain base release; mediates calcineurin-dependent ER stress response and resistance to azoles; Plc1p, Ca2+, calcineurin-regulated;	YOR049C	RSB1	phospholipid-translocating ATPase RSB1	Putative sphingoid long-chain base (LCB) efflux transporter; integral membrane transporter that localizes to the plasma membrane and may transport long chain bases (LCBs) from the cytoplasmic side toward the extracytoplasmic side of the membrane; role in glycerophospholipid translocation; suppressor of the sphingoid LCB sensitivity of an LCB-lyase mutation
	-0.597082169553539	CAGL0I04620g		Ortholog(s) have transferase activity, transferring acyl groups activity, role in phosphatidylinositol acyl-chain remodeling and endoplasmic reticulum, lipid particle localization	C6_01300W		Putative transferase involved in phospholipid biosynthesis; induced by alpha pheromone in SpiderM medium	YBR042C	CST26	putative acyltransferase|PSI1	Acyltransferase; enzyme mainly responsible for the introduction of saturated very long chain fatty acids into neo-synthesized molecules of phosphatidylinositol; required for incorporation of stearic acid into phosphatidylinositol; affects chromosome stability when overexpressed; CST26 has a paralog, YDR018C, that arose from the whole genome duplication
	-0.653525403845763	CAGL0F01111g		Ortholog(s) have role in inositol metabolic process and cytosol, nuclear envelope localization	CR_08330W		Ortholog(s) have role in inositol metabolic process and cytosol, nuclear envelope localization	YOL032W	OPI10		Protein with a possible role in phospholipid biosynthesis; null mutant displays an inositol-excreting phenotype that is suppressed by exogenous choline; protein abundance increases in response to DNA replication stress
	-0.696414585583389	CAGL0C02321g	PHM8	Ortholog(s) have lysophosphatidic acid phosphatase activity, nucleotidase activity and role in cellular response to phosphate starvation, nucleotide catabolic process, response to carbon starvation, triglyceride homeostasis				YER037W	PHM8	bifunctional nucleotidase/lysophosphatidic acid phosphatase	Lysophosphatidic acid (LPA) phosphatase, nucleotidase; principle and physiological nucleotidase working on GMP, UMP and CMP; involved in LPA hydrolysis in response to phosphate starvation and ribose salvage pathway; phosphatase activity is soluble and Mg2+ dependent; expression is induced by low phosphate levels and by inactivation of Pho85p; repressed by Gcn4p under normal conditions; PHM8 has a…
	-0.801700047606469	CAGL0A00341g		Ortholog(s) have role in sphingoid catabolic process and endoplasmic reticulum localization	C2_01660C		Protein of unknown function; possible ER protein; Hap43p-repressed; Spider biofilm induced	YGL010W	MPO1		Protein involved in metabolism of phytosphingosine; not an essential gene
	-0.804398066245412	CAGL0J04004g		Ortholog(s) have role in lipid homeostasis, mitochondrion organization and integral component of mitochondrial membrane, mitochondrial outer membrane localization	C7_01750W		Putative mitochondrial outer membrane protein; regulated by Sef1p-, Sfu1p-, and Hap43p	YOR228C	MCP1		Mitochondrial protein of unknown function involved in lipid homeostasis; integral membrane protein that localizes to the mitochondrial outer membrane; involved in mitochondrial morphology; interacts genetically with MDM10, and other members of the ERMES complex; contains five predicted transmembrane domains
	-0.81069832165245	CAGL0D00198g		Ortholog(s) have (R,R)-butanediol dehydrogenase activity, role in butanediol biosynthetic process and cytoplasm localization				YAL060W	BDH1	(R,R)-butanediol dehydrogenase|BDH	NAD-dependent (R,R)-butanediol dehydrogenase; catalyzes oxidation of (R,R)-2,3-butanediol to (3R)-acetoin, oxidation of meso-butanediol to (3S)-acetoin, and reduction of acetoin; enhances use of 2,3-butanediol as an aerobic carbon source
	-0.847379397365149	CAGL0I01980g		Putative activator of transcription; gene is upregulated in azole-resistant strain				YHR155W	YSP1	YSP1	Putative sterol transfer protein; localizes to puncta in the cortical ER; probable role in retrograde transport of sterols from the plasma membrane to the ER; one of six StART-like domain-containing proteins in yeast that may be involved in sterol transfer between intracellular membranes; conserved across eukaryotes; contains GRAM, StART-like (VASt) and two PH-like domains
	-0.875597813201527	CAGL0A01243g	GIT1	Has domain(s) with predicted transmembrane transporter activity, role in transmembrane transport and integral component of membrane localization
Nitrogen Metabolism	1.67174398455262	CAGL0H08393g		Ortholog(s) have amino acid transmembrane transporter activity, role in amino acid transport, transmembrane transport and endoplasmic reticulum localization				YBR068C	BAP2	branched-chain amino acid permease BAP2	High-affinity leucine permease; functions as a branched-chain amino acid permease involved in uptake of leucine, isoleucine and valine; contains 12 predicted transmembrane domains; BAP2 has a paralog, BAP3, that arose from the whole genome duplication
	0.997847664902098	CAGL0K07634g	GAT1	Ortholog(s) have sequence-specific DNA binding, transcription factor activity, RNA polymerase II transcription factor binding and transcriptional activator activity, more	C4_05880W	GAT1	GATA-type transcription factor; regulator of nitrogen utilization; required for nitrogen catabolite repression and utilization of isoleucine, tyrosine and tryptophan N sources; required for virulence in a mouse systemic infection model	YFL021W	GAT1	MEP80|NIL1	Transcriptional activator of nitrogen catabolite repression genes; contains a GATA-1-type zinc finger DNA-binding motif; activity and localization regulated by nitrogen limitation and Ure2p; different translational starts produce two major and two minor isoforms that are differentially regulated and localized
	0.982294848506539	CAGL0F04499g		Ortholog(s) have uridine transmembrane transporter activity, role in transmembrane transport, uridine transport and fungal-type vacuole, plasma membrane localization				YBL042C	FUI1	uridine permease	High affinity uridine permease, localizes to the plasma membrane; also mediates low but significant transport of the cytotoxic nucleoside analog 5-fluorouridine; not involved in uracil transport; relative distribution to the vacuole increases upon DNA replication stress
	0.943309166505771	CAGL0A03212g		Ortholog(s) have ammonium transmembrane transporter activity, role in ammonium transport, nitrogen utilization, transmembrane transport and mitochondrion, plasma membrane localization				YDR384C	ATO3	putative ammonium permease ATO3	Plasma membrane protein, putative ammonium transporter; regulation pattern suggests a possible role in export of ammonia from the cell; phosphorylated in mitochondria; member of the TC 9.B.33 YaaH family of putative transporters
	0.834511873860784	CAGL0J11352g		Ortholog(s) have thiol-dependent ubiquitin-specific protease activity, role in chromatin silencing at telomere, histone deubiquitination and cell surface, hyphal cell wall, nucleolus localization	C4_03440C	DOT4	Protein similar to ubiquitin C-terminal hydrolase; localizes to cell surface of hyphal cells, but not yeast-form cells; repressed upon high-level peroxide; Hap43p-induced; rat catheter biofilm induced	YNL186W	UBP10	ubiquitin-specific protease UBP10|DOT4	Nicotinamidase that converts nicotinamide to nicotinic acid; part of the NAD(+) salvage pathway; required for life span extension by calorie restriction; lacks a peroxisomal targeting signal but is imported into peroxisomes via binding to Gpd1p; PNC1 expression responds to all known stimuli that extend replicative life span; protein increases in abundance and relative distribution to cytoplasmic …
	0.638937467552102	CAGL0J08184g		Ortholog(s) have basic amino acid transmembrane transporter activity, role in basic amino acid transport and endoplasmic reticulum localization				YNL270C	ALP1	arginine permease ALP1|APL1	Lysine permease; one of three amino acid permeases (Alp1p, Can1p, Lyp1p) responsible for uptake of cationic amino acids
	0.62584291781402	CAGL0I05654g		Ortholog(s) have uridine kinase activity, role in pyrimidine-containing compound salvage and cell division site, cytosol, mitotic spindle pole body, nucleus localization	C3_04220C	URK1	Protein similar to uridine kinase; repressed by ciclopirox olamine; Spider biofilm induced	YNR012W	URK1	uridine kinase URK1	Low-affinity phosphate transporter; acts upstream of Pho81p in regulation of the PHO pathway; deletion of pho84, pho87, pho89, pho90, and pho91 causes synthetic lethality; transcription independent of Pi and Pho4p activity; overexpression results in vigorous growth; PHO90 has a paralog, PHO87, that arose from the whole genome duplication
	0.570185031598145	CAGL0K06809g		Ortholog(s) have Golgi apparatus localization	C4_04980W		Predicted membrane transporter; member of the peptide-acetyl-coA transporter (PAT) family, major facilitator superfamily (MFS); induced by alpha pheromone in Spider medium	YBR220C	YBR220C		Putative protein of unknown function; YBR220C is not an essential gene
	0.555906758752981	CAGL0D04796g		Ortholog(s) have peptide alpha-N-acetyltransferase activity	C1_06650W		Ortholog(s) have peptide alpha-N-acetyltransferase activity	YPR131C	NAT3	peptide alpha-N-acetyltransferase complex B subunit NAT3|RAD56|NAA20	Delta-1-pyrroline-5-carboxylate dehydrogenase; nuclear-encoded mitochondrial protein involved in utilization of proline as sole nitrogen source; deficiency of human homolog ALDH4A1 causes type II hyperprolinemia (HPII), an autosomal recessive inborn error of metabolism; human homolog ALDH4A1 can complement yeast null mutant
	0.541276141097933	CAGL0H06963g		Ortholog(s) have cytosol, nucleus localization	C2_08530C		Ortholog(s) have cytosol, nucleus localization	YML096W	YML096W	putative asparagine synthase	Putative protein with similarity to asparagine synthetases; green fluorescent protein (GFP)-fusion protein localizes to the cytoplasm; YML096W is not an essential gene and partially overlaps the verified gene RAD10
	0.534558110884568	CAGL0F02387g	PHO87	Ortholog(s) have inorganic phosphate transmembrane transporter activity, role in phosphate ion transport, polyphosphate metabolic process, regulation of phosphate transmembrane transport and plasma membrane localization				YJL198W	PHO90	SPX domain-containing inorganic phosphate transporter	Plasma membrane protein, putative ammonium transporter; regulation pattern suggests a possible role in export of ammonia from the cell; phosphorylated in mitochondria; member of the TC 9.B.33 YaaH family of putative transporters
	0.525929569401799	CAGL0G02453g		Ortholog(s) have dipeptide transmembrane transporter activity, tripeptide transporter activity and role in dipeptide transmembrane transport, tripeptide transport	C3_03800W	PTR22	Oligopeptide transporter involved in uptake of di-/tripeptides; regulated by Stp2 and Stp3; transcript induced upon phagocytosis by macrophage; repressed by Rim101 at pH 8; flow model biofilm induced	YKR093W	PTR2		Vacuolar transporter; imports large neutral amino acids into the vacuole; member of a family of seven S. cerevisiae genes (AVT1-7) related to vesicular GABA-glycine transporters
	0.514812864404184	CAGL0J08162g		Ortholog(s) have basic amino acid transmembrane transporter activity, role in basic amino acid transport and mitochondrion localization				YNL268W	LYP1	lysine permease	Lysine permease; one of three amino acid permeases (Alp1p, Can1p, Lyp1p) responsible for uptake of cationic amino acids
	0.514754711259874	CAGL0G02761g		Ortholog(s) have role in peptidyl-diphthamide biosynthetic process from peptidyl-histidine and cytosol, nucleus localization	C2_05840W		Predicted diphthamide biosynthesis protein; Spider biofilm induced	YIL103W	DPH1	KIF48	NADP(+)-dependent serine dehydrogenase and carbonyl reductase; acts on serine, L-allo-threonine, and other 3-hydroxy acids; green fluorescent protein fusion protein localizes to the cytoplasm and nucleus; may interact with ribosomes, based on co-purification experiments
	-0.500938008721237	CAGL0M05665g		Ortholog(s) have endopeptidase inhibitor activity, role in regulation of proteolysis, vacuole fusion, non-autophagic and cytosol, fungal-type vacuole, nucleus localization				YNL015W	PBI2	IB2|I2B|LMA1	Cytosolic inhibitor of vacuolar proteinase B (PRB1); required for efficient vacuole inheritance; with thioredoxin forms protein complex LMA1, which assists in priming SNARE molecules and promotes vacuole fusion; protein abundance increases in response to DNA replication stress
	-0.502023690418254	CAGL0A00363g		Ortholog(s) have 3-isopropylmalate dehydratase activity, role in leucine biosynthetic process and cytoplasmic stress granule, cytosol localization	CR_00360C	LEU1	3-isopropylmalate dehydratase; antigenic in humans; repressed in hyphae; alkaline repressed; upregulated by human whole blood or PMNs; regulated by Sef1, Sfu1, and Hap43; rat catheter biofilm induced, Spider biofilm repressed	YGL009C	LEU1	3-isopropylmalate dehydratase LEU1	Histidinol-phosphate aminotransferase; catalyzes the seventh step in histidine biosynthesis; responsive to general control of amino acid biosynthesis; mutations cause histidine auxotrophy and sensitivity to Cu, Co, and Ni salts
	-0.502875730097419	CAGL0C04917g		Ortholog(s) have carbamoyl-phosphate synthase (glutamine-hydrolyzing) activity, role in arginine biosynthetic process and carbamoyl-phosphate synthase complex, mitochondrion localization	CR_01330W	CPA2	Putative arginine-specific carbamoylphosphate synthetase; protein enriched in stationary phase yeast cultures; rat catheter biofilm induced; Spider biofilm induced	YJR109C	CPA2	carbamoyl-phosphate synthase (glutamine-hydrolyzing) CPA2	Protein required for synthesis of diphthamide; required along with Dph2p, Kti11p, Jjj3p, and Dph5p; diphthamide is a modified histidine residue of translation elongation factor 2 (Eft1p or Eft2p); may act in a complex with Dph2p and Kti11p
	-0.506330871981394	CAGL0G01903g	MET1	Ortholog(s) have uroporphyrin-III C-methyltransferase activity, role in cellular response to drug, methionine biosynthetic process, siroheme biosynthetic process and nucleus localization	C2_02940W	MET1	Putative uroporphyrin-3 C-methyltransferase, methionine biosynthesis enzyme; upregulated by human whole blood or polymorphonuclear (PMN) cells; Hog1p-induced; fungal-specific (no human or murine homolog); Hap43p-repressed	YKR069W	MET1	uroporphyrinogen-III C-methyltransferase|MET20	S-adenosyl-L-methionine uroporphyrinogen III transmethylase; involved in the biosynthesis of siroheme, a prosthetic group used by sulfite reductase; required for sulfate assimilation and methionine biosynthesis
	-0.510115552394464	CAGL0C01243g		Ortholog(s) have histidinol-phosphate transaminase activity, role in histidine biosynthetic process, response to nickel cation and cytosol, nucleus localization	C4_00650W	HIS5	Putative histidinol-phosphate aminotransferase; Gcn4p-regulated; protein present in exponential and stationary growth phase yeast cultures	YIL116W	HIS5	histidinol-phosphate transaminase	Guanine deaminase; a catabolic enzyme of the guanine salvage pathway producing xanthine and ammonia from guanine; activity is low in exponentially-growing cultures but expression is increased in post-diauxic and stationary-phase cultures
	-0.513914543885613	CAGL0D03982g		Ortholog(s) have 1-pyrroline-5-carboxylate dehydrogenase activity, role in glutamate biosynthetic process, hyphal growth, proline catabolic process to glutamate and cytosol, mitochondrial matrix localization	C5_04880C	PUT2	Putative delta-1-pyrroline-5-carboxylate dehydrogenase; alkaline upregulated; protein present in exponential and stationary growth phase yeast cultures; flow model biofilm induced; Spider biofilm induced	YHR037W	PUT2	1-pyrroline-5-carboxylate dehydrogenase	High-affinity leucine permease; functions as a branched-chain amino acid permease involved in uptake of leucine, isoleucine and valine; contains 12 predicted transmembrane domains; BAP2 has a paralog, BAP3, that arose from the whole genome duplication
	-0.524851306681006	CAGL0G02585g	LYS12	Homo-isocitrate dehydrogenase	CR_01400W	LYS12	Homoisocitrate dehydrogenase; catalyzes 4th step in the alpha-aminoadipate pathway of lysine biosynthesis; clade-associated gene expression; protein level decreases in stationary phase cultures; Spider biofilm repressed	YIL094C	LYS12	homoisocitrate dehydrogenase|LYS11|LYS10	Homo-isocitrate dehydrogenase; an NAD-linked mitochondrial enzyme required for the fourth step in the biosynthesis of lysine, in which homo-isocitrate is oxidatively decarboxylated to alpha-ketoadipate
	-0.538531330213096	CAGL0I07865g		Ortholog(s) have Golgi apparatus, endoplasmic reticulum, fungal-type vacuole, plasma membrane localization	C2_08140C	PHM7	Putative transporter; fungal-specific; Hog1-repressed; repressed by 17-beta-estradiol, ethynyl estradiol; Hap43-induced; Spider biofilm induced	YOL084W	PHM7		Protein of unknown function; expression is regulated by phosphate levels; green fluorescent protein (GFP)-fusion protein localizes to the cell periphery and vacuole; protein abundance increases in response to DNA replication stress
	-0.552086078050341	CAGL0D03036g		Ortholog(s) have L-glutamine transmembrane transporter activity, L-isoleucine transmembrane transporter activity, L-tyrosine transmembrane transporter activity	C7_00230W		Putative vacuolar transporter of large neutral amino acids; possibly transcriptionally regulated upon hyphal formation; not the true Avt1 ortholog of S. cerevisiae	YJR001W	AVT1		S-adenosyl-L-methionine uroporphyrinogen III transmethylase; involved in the biosynthesis of siroheme, a prosthetic group used by sulfite reductase; required for sulfate assimilation and methionine biosynthesis
	-0.577245493186141	CAGL0L03267g	GAP1	Ortholog(s) have L-proline transmembrane transporter activity, polyamine transmembrane transporter activity and role in amino acid transmembrane transport, polyamine transport, regulation of nitrogen utilization	C3_05580C	GAP2	General broad specificity amino acid permease; ketoconazole, flucytosine repressed; Ssy1-dependent histidine induction; regulated by Nrg1, Tup1; colony morphology-related gene regulation by Ssn6; Spider and flow model biofilm induced	YKR039W	GAP1	amino acid permease GAP1	General amino acid permease; Gap1p senses the presence of amino acid substrates to regulate localization to the plasma membrane when needed; essential for invasive growth
	-0.592867307227709	CAGL0G01254g	ARO8	Putative aromatic aminotransferase I
	-0.604818194288145	CAGL0L00759g	HIS1	ATP phosphoribosyltransferase; protein abundance increased in ace2 mutant cells
	-0.607972902221981	CAGL0K03157g	DUR31	Putative plasma membrane polyamine transporter	C1_04650W	DUR3	High affinity spermidine transporter; expression is induced by urea; fungal-specific (no human or murine homolog); not required for virulence in a mouse intravenous model	YHL016C	DUR3		Plasma membrane transporter for both urea and polyamines; expression is highly sensitive to nitrogen catabolite repression and induced by allophanate, the last intermediate of the allantoin degradative pathway
	-0.612736409637308	CAGL0B00902g	HIS4	Phosphoribosyl-AMP cyclohydrolase; phosphoribosyl-ATP pyrophosphatase; histidinol dehydrogenase	C4_00140C	HIS4	Multifunctional enzyme that catalyzes three steps of histidine biosynthesis, with phosphoribosyl-AMP cyclohydrolase, phosphoribosyl-ATP diphosphatase, and histidinol dehydrogenase activities; required for wild-type adhesion to human calls	YCL030C	HIS4	trifunctional histidinol dehydrogenase/phosphoribosyl-AMP cyclohydrolase/phosphoribosyl-ATP diphosphatase	Multifunctional enzyme containing phosphoribosyl-ATP pyrophosphatase; phosphoribosyl-AMP cyclohydrolase, and histidinol dehydrogenase activities; catalyzes the second, third, ninth and tenth steps in histidine biosynthesis
	-0.617993040911274	CAGL0J06402g		Ortholog(s) have homocitrate synthase activity, role in DNA repair, histone displacement, lysine biosynthetic process via aminoadipic acid and mitochondrion, nucleus localization				YDL182W	LYS20	homocitrate synthase LYS20
	-0.645928219798456	CAGL0H03795g	LEU2	3-isopropylmalate dehydrogenase
	-0.655173375050785	CAGL0M02981g		Ortholog(s) have phosphopentomutase activity, role in guanosine catabolic process, inosine catabolic process, purine ribonucleoside salvage and cytosol, nucleus localization	C3_07490W		Ortholog(s) have phosphopentomutase activity, role in guanosine catabolic process, inosine catabolic process, purine ribonucleoside salvage and cytosol, nucleus localization	YMR278W	PRM15	PGM3|phosphoribomutase PRM15	Phosphoribomutase; catalyzes interconversion of ribose-1-phosphate and ribose-5-phosphate; has some phosphoglucomutase activity but primary activity in vivo is phosphoribomutase; contributes to ribose recycling in the pentose phosphate pathway; transcription induced in response to stress; green fluorescent protein (GFP)-fusion protein localizes to the cytoplasm and nucleus; non-essential
	-0.702835182414956	CAGL0H02585g		Ortholog(s) have glutamate decarboxylase activity, role in cellular response to oxidative stress, glutamate catabolic process and cytoplasm localization	C1_11660W	GAD1	Putative glutamate decarboxylase; alkaline, macrophage-downregulated gene; amphotericin B induced; induced by Mnl1 under weak acid stress; stationary phase enriched protein; rat catheter biofilm repressed	YMR250W	GAD1	glutamate decarboxylase GAD1	Catalytic subunit of the NatB N-terminal acetyltransferase; NatB catalyzes acetylation of the amino-terminal methionine residues of all proteins beginning with Met-Asp or Met-Glu and of some proteins beginning with Met-Asn or Met-Met
	-0.704145968425511	CAGL0J09812g	TPS1	Ortholog(s) have alpha,alpha-trehalose-phosphate synthase (UDP-forming) activity	CR_05720W	TPS1	Trehalose-6-phosphate synthase; role in hyphal growth and virulence in mouse systemic infection; induced in presence of human neutrophils; macrophage/pseudohyphal-repressed after 16h; stationary phase enriched protein; Hap43-repressed	YBR126C	TPS1	alpha,alpha-trehalose-phosphate synthase (UDP-forming) TPS1|TSS1|GLC6|GGS1|FDP1|CIF1|BYP1	Synthase subunit of trehalose-6-P synthase/phosphatase complex; synthesizes the storage carbohydrate trehalose, which is critically important for survival of long-term desiccation; also found in a monomeric form; expression is induced by the stress response and repressed by the Ras-cAMP pathway; protein abundance increases in response to DNA replication stress and in response to prolonged exposur…
	-0.716885136862187	CAGL0K08536g	APE1	Vacuolar aminopeptidase I	C3_02170C	LAP41	Putative aminopeptidase yscI precursor; mutant is viable; protein present in exponential and stationary growth phase yeast cultures; Spider biofilm repressed	YKL103C	APE1	metalloaminopeptidase APE1|LAP4|API|YSC1	Vacuolar aminopeptidase yscI; zinc metalloproteinase that belongs to the peptidase family M18; often used as a marker protein in studies of autophagy and cytosol to vacuole targeting (CVT) pathway; protein increases in abundance and relative distribution to cytoplasmic foci increases upon DNA replication stress
	-0.72841787594778	CAGL0G02563g		Has domain(s) with predicted thiol-dependent ubiquitinyl hydrolase activity and role in protein deubiquitination, ubiquitin-dependent protein catabolic process
	-0.728555269250974	CAGL0A01716g		Ortholog(s) have nicotinamidase activity, role in chromatin silencing at rDNA, chromatin silencing at telomere, negative regulation of DNA amplification, replicative cell aging and biofilm matrix, cytosol, nucleus, peroxisome localization	C7_03520W	PNC1	Putative nicotinamidase, involved in NAD salvage pathway; decreased transcription is observed in an azole-resistant strain that overexpresses MDR1	YGL037C	PNC1	nicotinamidase	Large subunit of carbamoyl phosphate synthetase; carbamoyl phosphate synthetase catalyzes a step in the synthesis of citrulline, an arginine precursor
	-0.735734044361989	CAGL0K08800g	ADI1	Ortholog(s) have acireductone dioxygenase (Ni2+-requiring) activity, role in L-methionine salvage from methylthioadenosine and cytosol, nucleus localization	C1_11100W		Ortholog(s) have acireductone dioxygenase (Ni2+-requiring) activity, role in L-methionine salvage from methylthioadenosine and cytosol, nucleus localization	YMR009W	ADI1	acireductone dioxygenase (Ni2+-requiring)	Acireductone dioxygenease involved in methionine salvage pathway; transcribed as polycistronic mRNA with YMR010W and regulated post-transcriptionally by RNase III (Rnt1p) cleavage; ADI1 mRNA is induced in heat shock conditions; human ortholog ADI1 can complement yeast adi1 mutant
	-0.742873931613705	CAGL0B00770g	AUT4	Ortholog(s) have L-amino acid transmembrane transporter activity, role in L-alpha-amino acid transmembrane transport, amino acid transmembrane export from vacuole and integral component of fungal-type vacuolar membrane localization	CR_04610C		Ortholog of a S. cerevisiae Atg22; a vacuolar integral membrane protein required for efflux of amino acids during autophagic body breakdown in the vacuole; possibly an essential gene, disruptants not obtained by UAU1 method	YCL038C	ATG22	AUT4	Vacuolar integral membrane protein required for efflux of amino acids; required for efflux of amino acids during autophagic body breakdown in the vacuole; null mutation causes a gradual loss of viability during starvation
	-0.761800874826184	CAGL0M11242g		Ortholog(s) have carbonyl reductase (NADPH) activity, serine 3-dehydrogenase activity and cytosol, nucleus, ribosome localization	C4_01510W		Ortholog(s) have carbonyl reductase (NADPH) activity, serine 3-dehydrogenase activity and cytosol, nucleus, ribosome localization	YMR226C	YMR226C	oxidoreductase|TMA29	Gamma-aminobutyrate (GABA) transaminase; also known as 4-aminobutyrate aminotransferase; involved in the 4-aminobutyrate and glutamate degradation pathways; required for normal oxidative stress tolerance and nitrogen utilization; protein abundance increases in response to DNA replication stress
	-0.766159285154364	CAGL0B00990g	HBN1	Ortholog(s) have oxidoreductase activity, acting on NAD(P)H, nitrogenous group as acceptor activity and role in cellular response to oxidative stress, negative regulation of fatty acid metabolic process				YCL026C-A	FRM2	type II nitroreductase|YCLX08C	Isopropylmalate isomerase; catalyzes the second step in the leucine biosynthesis pathway
	-0.767975295451573	CAGL0M06347g		Ortholog(s) have phytoceramidase activity, sphingosine N-acyltransferase activity, role in ceramide biosynthetic process, ceramide catabolic process and cortical endoplasmic reticulum localization				YBR183W	YPC1	phytoceramidase	Alkaline ceramidase; also has reverse (CoA-independent) ceramide synthase activity; catalyzes both breakdown and synthesis of phytoceramide; overexpression confers fumonisin B1 resistance; YPC1 has a paralog, YDC1, that arose from the whole genome duplication
	-0.785601094930732	CAGL0C05555g		Ortholog(s) have guanine deaminase activity, role in cellular response to drug and cytosol localization	C7_00870W		Putative guanine deaminase; mutation confers hypersensitivity to toxic ergosterol analog; Spider biofilm induced	YDL238C	GUD1	guanine deaminase	Guanine deaminase; a catabolic enzyme of the guanine salvage pathway producing xanthine and ammonia from guanine; activity is low in exponentially-growing cultures but expression is increased in post-diauxic and stationary-phase cultures
	-0.801408624662494	CAGL0G05698g	GDH2	Ortholog(s) have glutamate dehydrogenase (NAD+) activity, role in nitrogen compound metabolic process and cytosol, mitochondrion localization	C2_07900W	GDH2	Putative NAD-specific glutamate dehydrogenase; fungal-specific; transcript regulated by Nrg1, Mig1, Tup1, and Gcn4; stationary phase enriched protein; flow model biofilm induced; Spider biofilm induced	YDL215C	GDH2	glutamate dehydrogenase (NAD(+))|GDHB|GDH-B	NAD(+)-dependent glutamate dehydrogenase; degrades glutamate to ammonia and alpha-ketoglutarate; expression sensitive to nitrogen catabolite repression and intracellular ammonia levels; genetically interacts with GDH3 by suppressing stress-induced apoptosis
	-0.857349523373931	CAGL0J06028g	MEP2	Ortholog(s) have high-affinity secondary active ammonium transmembrane transporter activity, methylammonium transmembrane transporter activity	C4_00430W	MEP2	Ammonium permease and regulator of nitrogen starvation-induced filamentation; 11 predicted transmembrane regions; in low nitrogen cytoplasmic C-terminus activates Ras/cAMP and MAPK signal transduction pathways to induce filamentation	YNL142W	MEP2	ammonium permease MEP2	Integral membrane peptide transporter; mediates transport of di- and tri-peptides; conserved protein that contains 12 transmembrane domains; PTR2 expression is regulated by the N-end rule pathway via repression by Cup9p
	-0.860830265073527	CAGL0H02893g		Ortholog(s) have mitochondrion localization				YJL070C	YJL070C	metallo-dependent hydrolase superfamily protein	Putative metallo-dependent hydrolase superfamily protein; similar to AMP deaminases but lacks key catalytic residues and does not rescue purine nucleotide metabolic defect of quadruple aah1 ade8 amd1 his1 mutant; may regulate purine nucleotide homeostasis as overexpression in an AMD1 strain grown in adenine results in greatly reduced GDP and GTP intracellular levels; not an essential gene; YJL070…
	-0.868971383795161	CAGL0K00231g		Ortholog(s) have 5-oxoprolinase (ATP-hydrolyzing) activity, role in glutathione metabolic process and cytosol localization	C2_02990C	HYU1	Putative hydantoin utilization protein A; induced upon adherence to polystyrene; regulated by Gcn2p and Gcn4p	YKL215C	OXP1	5-oxoprolinase	5-oxoprolinase; enzyme is ATP-dependent and functions as a dimer; similar to mouse Oplah gene; green fluorescent protein (GFP)-fusion protein localizes to the cytoplasm; protein abundance increases in response to DNA replication stress
	-0.901429794495878	CAGL0I08305g		Ortholog(s) have carnitine O-acetyltransferase activity	C3_04000C	CTN3	Peroxisomal carnitine acetyl transferase; no obvious metabolic, hyphal, virulence defects in Ura+ strain; induced by macrophage engulfment, hyphal growth, starvation, nonfermentable carbon sources; rat catheter, Spider biofilm induced	YER024W	YAT2	carnitine O-acetyltransferase YAT2	Carnitine acetyltransferase; has similarity to Yat1p, which is a carnitine acetyltransferase associated with the mitochondrial outer membrane
	-0.911474874602973	CAGL0D04026g		Ortholog(s) have 4-aminobutyrate transaminase activity, pyridoxal phosphate binding activity and role in cellular amide catabolic process, gamma-aminobutyric acid catabolic process, glutamate metabolic process	C2_04190C	UGA1	Putative GABA transaminase; transcription regulated by Mig1 and Tup1; stationary phase enriched protein; rat catheter and Spider biofilm induced	YGR019W	UGA1	4-aminobutyrate transaminase	Uridine/cytidine kinase; component of the pyrimidine ribonucleotide salvage pathway that converts uridine into UMP and cytidine into CMP; involved in the pyrimidine deoxyribonucleotide salvage pathway, converting deoxycytidine into dCMP
	-0.983297406501589	CAGL0I10791g		Ortholog(s) have ornithine carbamoyltransferase activity, role in arginine biosynthetic process via ornithine, asexual sporulation and mitochondrial matrix localization							Glutamate decarboxylase; converts glutamate into gamma-aminobutyric acid (GABA) during glutamate catabolism; involved in response to oxidative stress
	-1.22721442711942	CAGL0L06094g	STR3	Putative cystathionine beta-lyase; gene is upregulated in azole-resistant strain	C2_00390C		Putative peroxisomal cystathionine beta-lyase; Gcn4p-regulated	YGL184C	STR3	cystathionine beta-lyase STR3	Ubiquitin-specific protease, deubiquitinates Ub-protein moieties; interacts with proteins that function in rRNA production and ribosome biogenesis via its intrinsically disordered regions; stabilizes Rpa190p by deubiquitination; controls PCNA deubiquitylation; may regulate silencing by acting on Sir4p; involved in posttranscriptionally regulating Gap1p, possibly other transporters; localized to t…
Carbon Metabolism	1.1926495115252	CAGL0A01804g	HXT1	Ortholog(s) have fructose transmembrane transporter activity, pentose transmembrane transporter activity, role in glucose transport, mannose transport and plasma membrane localization				YHR094C	HXT1	hexose transporter HXT1|HOR4	Low-affinity glucose transporter of the major facilitator superfamily; expression is induced by Hxk2p in the presence of glucose and repressed by Rgt1p when glucose is limiting; HXT1 has a paralog, HXT6, what arose from the whole genome duplication
	0.873026202142553	CAGL0A01628g	MIG1	Transcriptional regulatory protein	C5_02940C	MIG1	C2H2 transcription factor; repressor; regulates genes for carbon source utilization; Tup1-dependent and independent functions; hyphal, Hap43 and caspofungin repressed; Spider and flow model biofilm induced	YGL035C	MIG1	transcription factor MIG1|TDS22|SSN1|CAT4	Transcription factor involved in glucose repression; sequence specific DNA binding protein containing two Cys2His2 zinc finger motifs; regulated by the SNF1 kinase and the GLC7 phosphatase; regulates filamentous growth along with Mig2p in response to glucose depletion; activated in stochastic pulses of nuclear localization, shuttling between cytosol and nucleus depending on external glucose level…
	0.831450167273513	CAGL0A02321g	HXT3	Ortholog(s) have fructose transmembrane transporter activity, glucose transmembrane transporter activity, mannose transmembrane transporter activity and role in fructose import across plasma membrane, glucose import across plasma membrane				YHR096C	HXT5	hexose transporter HXT5	Hexose transporter with moderate affinity for glucose; induced in the presence of non-fermentable carbon sources, induced by a decrease in growth rate, contains an extended N-terminal domain relative to other HXTs; HXT5 has a paralog, HXT3, that arose from the whole genome duplication
	0.761446183009416	CAGL0E01529g		Ortholog(s) have role in fructose 2,6-bisphosphate metabolic process, regulation of glycolytic process	C1_11080W		Putative 6-phosphofructo-2-kinase; catalyzes synthesis of fructose-2,6-bisphosphate; Hap43-repressed; flow model, rat catheter and Spider biofilm induced	YOL136C	PFK27	6-phosphofructo-2-kinase|PFK-2	6-phosphofructo-2-kinase; catalyzes synthesis of fructose-2,6-bisphosphate; inhibited by phosphoenolpyruvate and sn-glycerol 3-phosphate, expression induced by glucose and sucrose, transcriptional regulation involves protein kinase A
	0.679776236559777	CAGL0I03872g		Ortholog(s) have role in detection of glucose, glucose mediated signaling pathway and plasma membrane localization				YDL138W	RGT2	glucose sensor	Plasma membrane high glucose sensor that regulates glucose transport; low affinity sesnor that contains 12 predicted transmembrane segments and a long C-terminal tail required for hexose transporter induction; phosphorylation of the tail by Yck1p/Yck2p facilitates binding to the HXT co-repressors, Mth1p and Std1p; RGT2 has a paralog, SNF3, that arose from the whole genome duplication
	0.615141224584855	CAGL0I00286g		Has domain(s) with predicted substrate-specific transmembrane transporter activity, transmembrane transporter activity, role in transmembrane transport and integral component of membrane, membrane localization
	0.597117218297287	CAGL0J08910g		Has domain(s) with predicted hydrolase activity, hydrolyzing O-glycosyl compounds activity and role in carbohydrate metabolic process
	0.595534894831904	CAGL0F00913g		Ortholog(s) have protein serine/threonine kinase activity				YOL045W	PSK2	serine/threonine protein kinase PSK2	PAS-domain containing serine/threonine protein kinase; regulates sugar flux and translation in response to an unknown metabolite by phosphorylating Ugp1p and Gsy2p (sugar flux) and Caf20p, Tif11p and Sro9p (translation); PSK2 has a paralog, PSK1, that arose from the whole genome duplication
	-0.504604981880522	CAGL0H00682g		Has domain(s) with predicted mannosyl-oligosaccharide glucosidase activity and role in oligosaccharide metabolic process
	-0.53153214728512	CAGL0B03069g	TAL1	Putative transaldolase; expression upregulated in biofilm vs planktonic cell culture	CR_03720W	TAL1	Transaldolase; protein present in exponential and stationary growth phase yeast cultures; oxidative stress-induced via Cap1; induced by nitric oxide independent of Yhb1p; sumoylation target; rat catheter biofilm repressed	YLR354C	TAL1	sedoheptulose-7-phosphate:D-glyceraldehyde-3-phosphate transaldolase TAL1	Transaldolase, enzyme in the non-oxidative pentose phosphate pathway; converts sedoheptulose 7-phosphate and glyceraldehyde 3-phosphate to erythrose 4-phosphate and fructose 6-phosphate; TAL1 has a paralog, NQM1, that arose from the whole genome duplication
	-0.560704566645696	CAGL0M13343g	GND1	6-phosphogluconate dehydrogenase	C1_13860C	GND1	6-phosphogluconate dehydrogenase; soluble in hyphae; farnesol, macrophage-induced protein; antigenic in mice; dual localization to cytosol and peroxisomes depends on alternative splicing; rat catheter and Spider biofilm repressed	YHR183W	GND1	phosphogluconate dehydrogenase (decarboxylating) GND1	6-phosphogluconate dehydrogenase (decarboxylating); catalyzes an NADPH regenerating reaction in the pentose phosphate pathway; required for growth on D-glucono-delta-lactone and adaptation to oxidative stress; GND1 has a paralog, GND2, that arose from the whole genome duplication
	-0.568775476489406	CAGL0C01771g		Ortholog(s) have fungal-type vacuole membrane localization	CR_03040C	HGT18	Putative glucose transporter of the major facilitator superfamily; the C. albicans glucose transporter family comprises 20 members; 12 probable membrane-spanning segments; expressed in rich medium with 2% glucose	YBR241C	YBR241C		Putative transporter, member of the sugar porter family; green fluorescent protein (GFP)-fusion protein localizes to the vacuolar membrane; YBR241C is not an essential gene; YBR241C has a paralog, VPS73, that arose from the whole genome duplication
	-0.573430750109199	CAGL0I07315g		Ortholog(s) have cytoplasm, nucleus localization				YOR131C	YOR131C	putative haloacid dehalogenase-like hydrolase	Putative haloacid dehalogenase-like hydrolase; non-essential gene; overexpression causes a cell cycle delay or arrest; protein abundance increases in response to DNA replication stress
	-0.579998591148064	CAGL0J02904g		Ortholog(s) have protein phosphatase regulator activity, role in glycogen metabolic process, protein dephosphorylation and protein phosphatase type 1 complex localization				YER054C	GIP2		Putative regulatory subunit of protein phosphatase Glc7p; involved in glycogen metabolism; contains a conserved motif (GVNK motif) that is also found in Gac1p, Pig1p, and Pig2p; GIP2 has a paralog, PIG2, that arose from the whole genome duplication
	-0.582337964763665	CAGL0C05027g		Ortholog(s) have role in acetate catabolic process, alcohol metabolic process, carnitine metabolic process, cellular respiration and cytosol, mitochondrion localization	C1_01740W	CTN1	Carnitine acetyl transferase; required for growth on nonfermentable carbon sources, not for hyphal growth or virulence in mice; induced in macrophage; macrophage/pseudohyphal-repressed after 16 hr; rat catheter, Spider biofilm induced	YAR035W	YAT1	carnitine O-acetyltransferase YAT1	Outer mitochondrial carnitine acetyltransferase; minor ethanol-inducible enzyme involved in transport of activated acyl groups from the cytoplasm into the mitochondrial matrix; phosphorylated
	-0.584146714215447	CAGL0J07612g	ZWF1	Glucose-6-phosphate 1-dehydrogenase	C1_08980C	ZWF1	Glucose-6-phosphate dehydrogenase; antigenic in mice; activity induced by O2 or oxidizing agents H2O2, menadione, macrophage; caspofungin repressed; induced in core stress response; regulated by Gcn2, Gcn4; rat catheter biofilm repressed	YNL241C	ZWF1	glucose-6-phosphate dehydrogenase|POS10|MET19	Glucose-6-phosphate dehydrogenase (G6PD); catalyzes the first step of the pentose phosphate pathway; involved in adapting to oxidative stress; protein abundance increases in response to DNA replication stress; homolog of human G6PD which is deficient in patients with hemolytic anemia; human G6PD can complement yeast zwf1 null mutant
	-0.586569098807731	CAGL0E05148g		Ortholog(s) have alpha-mannosidase activity, role in oligosaccharide catabolic process and cytosol, fungal-type vacuole membrane localization	C4_02360W	AMS1	Putative alpha-mannosidase; transcript regulated by Nrg1; induced during cell wall regeneration; flow model biofilm induced; Spider biofilm induced	YGL156W	AMS1	alpha-mannosidase	Vacuolar alpha mannosidase; involved in free oligosaccharide (fOS) degradation; delivered to the vacuole in a novel pathway separate from the secretory pathway
	-0.590202458278562	CAGL0L03982g		Ortholog(s) have malate synthase activity, role in acetate catabolic process, carbon utilization, fatty acid catabolic process, glyoxylate cycle and cytosol, glyoxysome, peroxisomal matrix localization	C1_09690W	MLS1	Malate synthase; glyoxylate cycle enzyme; no mammalian homolog; regulated upon white-opaque switch; phagocytosis, strong oxidative stress induced; stationary phase enriched; flow model biofilm repressed; rat catheter, Spider biofilm induced	YNL117W	MLS1	malate synthase MLS1	Malate synthase, enzyme of the glyoxylate cycle; involved in utilization of non-fermentable carbon sources; expression is subject to carbon catabolite repression; localizes in peroxisomes during growth on oleic acid, otherwise cytosolic; can accept butyryl-CoA as acyl-CoA donor in addition to traditional substrate acetyl-CoA
	-0.603207883514577	CAGL0M13937g		Ortholog(s) have enzyme activator activity, role in chromosome segregation and cytoplasm, nucleus localization	C4_02860W		Ortholog(s) have enzyme activator activity, role in chromosome segregation and cytoplasm, nucleus localization	YMR311C	GLC8		Regulatory subunit of protein phosphatase 1 (Glc7p); involved in glycogen metabolism and chromosome segregation; proposed to regulate Glc7p activity via conformational alteration; ortholog of the mammalian protein phosphatase inhibitor 2; protein abundance increases in response to DNA replication stress
	-0.620294458521885	CAGL0L09273g		Ortholog(s) have isocitrate lyase activity, methylisocitrate lyase activity, role in propionate catabolic process, 2-methylcitrate cycle and mitochondrial matrix localization				YPR006C	ICL2	methylisocitrate lyase ICL2	2-methylisocitrate lyase of the mitochondrial matrix; functions in the methylcitrate cycle to catalyze the conversion of 2-methylisocitrate to succinate and pyruvate; ICL2 transcription is repressed by glucose and induced by ethanol
	-0.639921246244443	CAGL0M10439g		Ortholog(s) have alpha,alpha-trehalase activity, calcium ion binding activity, role in ascospore formation, cellular response to desiccation, trehalose catabolic process involved in cellular response to stress and cytosol localization	CR_00560W	NTH1	Neutral trehalase; hyphal induction in mutant delayed but not reduced overall; not required for virulence in mice; possible regulatory cAMP-dependent phosphorylation at S10,S213; Hap43-repressed gene; Spider biofilm induced	YDR001C	NTH1	alpha,alpha-trehalase NTH1	Neutral trehalase, degrades trehalose; required for thermotolerance and may mediate resistance to other cellular stresses; phosphorylated and activated by Cdc28p at the G1/S phase transition to coordinately regulate carbohydrate metabolism and the cell cycle; inhibited by Dcs1p; NTH1 has a paralog, NTH2, that arose from the whole genome duplication
	-0.64207177095379	CAGL0F06061g		Ortholog(s) have D-arabinose 1-dehydrogenase [NAD(P)+] activity and role in dehydro-D-arabinono-1,4-lactone biosynthetic process	C4_00380W		Ortholog(s) have D-arabinose 1-dehydrogenase [NAD(P)+] activity and role in dehydro-D-arabinono-1,4-lactone biosynthetic process	YMR041C	ARA2	D-arabinose 1-dehydrogenase (NAD(P)(+)) ARA2	NAD-dependent arabinose dehydrogenase; involved in biosynthesis of dehydro-D-arabinono-1,4-lactone; similar to plant L-galactose dehydrogenase
	-0.66121867180619	CAGL0L00803g		Ortholog(s) have role in regulation of glycogen biosynthetic process and cytoplasm localization				YIL045W	PIG2	putative protein phosphatase regulator PIG2	Putative type-1 protein phosphatase targeting subunit; tethers Glc7p type-1 protein phosphatase to Gsy2p glycogen synthase; PIG2 has a paralog, GIP2, that arose from the whole genome duplication
	-0.661428588941258	CAGL0A04829g		Putative hexokinase isoenzyme 2; protein differentially expressed in azole resistant strain	C6_04580W	HXK1	N-acetylglucosamine (GlcNAc) kinase; involved in GlcNAc utilization; required for wild-type hyphal growth and mouse virulence; GlcNAc-induced transcript; induced by alpha pheromone in SpiderM medium	YFR053C	HXK1	hexokinase 1	Hexokinase isoenzyme 1; a cytosolic protein that catalyzes phosphorylation of glucose during glucose metabolism; expression is highest during growth on non-glucose carbon sources; glucose-induced repression involves hexokinase Hxk2p; HXK1 has a paralog, HXK2, that arose from the whole genome duplication
	-0.66179130598165	CAGL0G09977g	GDB1	Ortholog(s) have 4-alpha-glucanotransferase activity, amylo-alpha-1,6-glucosidase activity, role in glycogen catabolic process and mitochondrion localization	C4_05140C	GDB1	Putative glycogen debranching enzyme; expression is regulated upon white-opaque switch; regulated by Nrg1, Tup1; rat catheter biofilm repressed	YPR184W	GDB1	bifunctional 4-alpha-glucanotransferase/amylo-alpha-1,6-glucosidase	Glycogen debranching enzyme; contains glucanotranferase and alpha-1,6-amyloglucosidase activities; required for glycogen degradation; phosphorylated in mitochondria; activity is inhibited by Igd1p; protein abundance increases in response to DNA replication stress
	-0.674078165930958	CAGL0G05335g	TPS2	Ortholog(s) have trehalose-phosphatase activity	C1_03380W	TPS2	Trehalose-6-phosphate (Tre6P) phosphatase; mutant heat sensitive, accumulates Tre6P, decreased mouse virulence; possible drug target; 2 conserved phospohydrolase motifs; no mammalian homolog; Hap43-repressed; flow model biofilm induced	YDR074W	TPS2	trehalose-phosphatase TPS2|PFK3|HOG2	Phosphatase subunit of the trehalose-6-P synthase/phosphatase complex; involved in synthesis of the storage carbohydrate trehalose; expression is induced by stress conditions and repressed by the Ras-cAMP pathway; protein abundance increases in response to DNA replication stress
	-0.679016764911082	CAGL0C01397g		Ortholog(s) have 6-phosphofructo-2-kinase activity and role in fructose 2,6-bisphosphate metabolic process	C1_08950W	PFK26	Putative 6-phosphofructo-2-kinase; protein repressed during the mating process	YIL107C	PFK26	PFK-2|PFK2	6-phosphofructo-2-kinase; inhibited by phosphoenolpyruvate and sn-glycerol 3-phosphate; has negligible fructose-2,6-bisphosphatase activity; transcriptional regulation involves protein kinase A
	-0.695705986573218	CAGL0F07777g		Putative aldehyde dehydrogenase; expression upregulated in biofilm vs planktonic cell culture				YMR169C	ALD3	aldehyde dehydrogenase (NAD(+)) ALD3	Cytoplasmic aldehyde dehydrogenase; involved in beta-alanine synthesis; uses NAD+ as the preferred coenzyme; very similar to Ald2p; expression is induced by stress and repressed by glucose
	-0.705124773955092	CAGL0I01100g	GCY1	Ortholog(s) have alditol:NADP+ 1-oxidoreductase activity, glycerol dehydrogenase [NAD(P)+] activity, mRNA binding activity	C3_07340W	GCY1	Aldo/keto reductase; mutation confers hypersensitivity to toxic ergosterol analog; farnesol-repressed; stationary phase enriched protein; flow model biofilm induced; Spider biofilm repressed	YOR120W	GCY1	glycerol 2-dehydrogenase (NADP(+)) GCY1|GCY	Glycerol dehydrogenase; involved in an alternative pathway for glycerol catabolism used under microaerobic conditions; also has mRNA binding activity; member of the aldo-keto reductase (AKR) family; human homolog AKR1B1 can complement yeast null mutant; protein abundance increases in response to DNA replication stress; GCY1 has a paralog, YPR1, that arose from the whole genome duplication
	-0.708809757379889	CAGL0J01441g		Ortholog(s) have alcohol dehydrogenase (NAD) activity				YMR083W	ADH3	alcohol dehydrogenase ADH3	Mitochondrial alcohol dehydrogenase isozyme III; involved in the shuttling of mitochondrial NADH to the cytosol under anaerobic conditions and ethanol production
	-0.718388814794478	CAGL0K07480g	PGM1	Putative phosphoglucomutase				YKL127W	PGM1	phosphoglucomutase PGM1	Phosphoglucomutase, minor isoform; catalyzes the conversion from glucose-1-phosphate to glucose-6-phosphate, which is a key step in hexose metabolism; PGM1 has a paralog, PGM2, that arose from the whole genome duplication
	-0.743407802714112	CAGL0L04268g		Ortholog(s) have IMP 5'-nucleotidase activity, role in inosine salvage, nicotinamide riboside biosynthetic process, nicotinic acid riboside biosynthetic process and cytosol, nucleus localization	C1_01650W	ISN1	Putative inosine 5'-monophosphate 5'-nucleotidase; fungal-specific (no human or murine homolog)	YOR155C	ISN1	IMP 5'-nucleotidase	Inosine 5'-monophosphate (IMP)-specific 5'-nucleotidase; catalyzes the breakdown of IMP to inosine; responsible for production of nicotinamide riboside and nicotinic acid riboside; expression positively regulated by nicotinic acid and glucose availability; does not show similarity to known 5'-nucleotidases from other organisms
	-0.787549576149911	CAGL0F00605g	GLK1	Aldohexose specific glucokinase				YDR516C	EMI2	putative glucokinase	Non-essential protein of unknown function; required for transcriptional induction of the early meiotic-specific transcription factor IME1; required for sporulation; expression regulated by glucose-repression transcription factors Mig1/2p; EMI2 has a paralog, GLK1, that arose from the whole genome duplication; protein abundance increases in response to DNA replication stress
	-0.797488842560369	CAGL0I04048g		Ortholog(s) have fructose 1,6-bisphosphate 1-phosphatase activity, role in carbon utilization, cellular response to glucose starvation, glycerol catabolic process and cytosol, nucleus localization
	-0.821119474279885	CAGL0I01122g	GRE3	Ortholog(s) have D-xylose:NADP reductase activity, NADPH binding, mRNA binding activity	C5_02930C	GRE3	Putative D-xylose reductase; antigenic in murine systemic infection; soluble protein in hyphae; induced by farnesol, macrophage interaction and by Mnl1 under weak acid stress; stationary-phase enriched protein; Spider biofilm induced	YHR104W	GRE3	trifunctional aldehyde reductase/xylose reductase/glucose 1-dehydrogenase (NADP(+))	Aldose reductase; involved in methylglyoxal, d-xylose, arabinose, and galactose metabolism; stress induced (osmotic, ionic, oxidative, heat shock, starvation and heavy metals); regulated by the HOG pathway; protein abundance increases in response to DNA replication stress
	-0.821938518905989	CAGL0M09020g		Ortholog(s) have succinate:fumarate antiporter activity, role in acetate catabolic process, carbon utilization, fatty acid catabolic process, fumarate transport, succinate transport and mitochondrion, plasma membrane localization	C5_04440C	SFC1	Putative succinate-fumarate transporter; involved in repression of growth on sorbose; alkaline induced; rat catheter biofilm induced; Spider biofilm induced	YJR095W	SFC1	ACR1	Mitochondrial succinate-fumarate transporter; transports succinate into and fumarate out of the mitochondrion; required for ethanol and acetate utilization
	-0.826602904894273	CAGL0F08261g		Ortholog(s) have high molecular weight kininogen binding, phosphopyruvate hydratase activity	C1_08500C	ENO1	Enolase; glycolysis and gluconeogenesis; major cell-surface antigen; binds host plasmin/plasminogen; immunoprotective; Hap43, phagocytosis induced; farnesol-repressed; flow model biofilm induced; Spider biofilm repressed; may be essential	YGR254W	ENO1	phosphopyruvate hydratase ENO1|HSP48	Enolase I, a phosphopyruvate hydratase; catalyzes conversion of 2-phosphoglycerate to phosphoenolpyruvate during glycolysis and the reverse reaction during gluconeogenesis; expression repressed in response to glucose; protein abundance increases in response to DNA replication stress; N-terminally propionylated in vivo; ENO1 has a paralog, ENO2, that arose from the whole genome duplication
	-0.826814998998381	CAGL0K10626g		Ortholog(s) have glycogen (starch) synthase activity, role in glycogen biosynthetic process and mitochondrion localization	CR_00780C	GSY1	UDP glucose/starch glucosyltransferase; transcript repressed by yeast-hyphal switch, Efg1-regulated; strong oxidative stress induced; colony morphology-related regulation by Ssn6; stationary phase enriched; flow model biofilm induced	YFR015C	GSY1	glycogen (starch) synthase GSY1	Glycogen synthase; expression induced by glucose limitation, nitrogen starvation, environmental stress, and entry into stationary phase; GSY1 has a paralog, GSY2, that arose from the whole genome duplication; relocalizes from nucleus to cytoplasmic foci upon DNA replication stress
	-0.835273577146869	CAGL0A03102g	ARO10	Ortholog(s) have phenylpyruvate decarboxylase activity	CR_06860C	ARO10	Aromatic decarboxylase; Ehrlich fusel oil pathway of aromatic alcohol biosynthesis; alkaline repressed; protein abundance affected by URA3 expression in CAI-4 strain; Spider biofilm induced	YDR380W	ARO10	phenylpyruvate decarboxylase ARO10	Phenylpyruvate decarboxylase; catalyzes decarboxylation of phenylpyruvate to phenylacetaldehyde, which is the first specific step in the Ehrlich pathway; involved in protein N-terminal Met and Ala catabolism
	-0.878789819345042	CAGL0L01925g	UGP1	Putative UDP-glucose pyrophosphorylase; increased protein abundance in azole resistant strain	CR_04660C	UGP1	UTP-glucose-1-phosphaturidyl transferase; localizes to yeast, not hyphal cell surface; Hog1-repressed; stationary phase enriched; induced in oralpharyngeal candidasis; rat catheter biofilm repressed; Bcr1-repressed in RPMI a/a biofilms	YKL035W	UGP1	UTP glucose-1-phosphate uridylyltransferase	UDP-glucose pyrophosphorylase (UGPase); catalyses the reversible formation of UDP-Glc from glucose 1-phosphate and UTP, involved in a wide variety of metabolic pathways, expression modulated by Pho85p through Pho4p; involved in PKA-mediated oxidative stress resistance and long-term survival in stationary phase; UGP1 has a paralog, YHL012W, that arose from the whole genome duplication
	-0.904803197819359	CAGL0H02695g		Ortholog(s) have glycogenin glucosyltransferase activity and role in glycogen biosynthetic process				YKR058W	GLG1	glycogenin glucosyltransferase GLG1	Glycogenin glucosyltransferase; self-glucosylating initiator of glycogen synthesis, also glucosylates n-dodecyl-beta-D-maltoside; SWAT-GFP and mCherry fusion proteins localize to the cell periphery and vacuole respectively; similar to mammalian glycogenin; GLG1 has a paralog, GLG2, that arose from the whole genome duplication
	-0.949684272018722	CAGL0B03465g		Ortholog(s) have role in ethanol metabolic process and mitochondrial inner membrane localization	C2_06430C		Ortholog(s) have role in ethanol metabolic process and mitochondrial inner membrane localization	YLR251W	SYM1	ethanol metabolism protein	Protein required for ethanol metabolism; induced by heat shock and localized to the inner mitochondrial membrane; homologous to mammalian peroxisomal membrane protein Mpv17; human homolog MPV17 is implicated in hepatocerebral mtDNA depletion syndromes (MDDS), and complements yeast null mutant
	-0.956338698878302	CAGL0M03377g		Ortholog(s) have 1,4-alpha-glucan branching enzyme activity, role in glycogen biosynthetic process and cytoplasm localization	C6_03340C	GLC3	Putative 1,4-glucan branching enzyme; fluconazole-induced; colony morphology-related gene regulation by Ssn6; stationary phase enriched protein	YEL011W	GLC3	1,4-alpha-glucan branching enzyme|GHA1	Glycogen branching enzyme, involved in glycogen accumulation; green fluorescent protein (GFP)-fusion protein localizes to the cytoplasm in a punctate pattern; relocalizes from nucleus to cytoplasmic foci upon DNA replication stress; glycogen accumulation defect of the null mutant is functionally complemented by human GBE1, which is associated with glycogen storage disease
	-0.963171633218036	CAGL0H02387g		Putative trehalose-6-phosphate synthase/phosphatase subunit; gene is upregulated in azole-resistant strain	C2_10690W	TPS3	Predicted trehalose-phosphate synthase regulatory subunit; regulated by Efg1; regulated by Tsa1, Tsa1B under H2O2 stress conditions; flow model biofilm induced (reports differ)	YMR261C	TPS3	trehalose 6-phosphate synthase/phosphatase complex subunit	Regulatory subunit of trehalose-6-phosphate synthase/phosphatase; involved in synthesis of storage carbohydrate trehalose; expression is induced by stress conditions and repressed by the Ras-cAMP pathway; TPS3 has a paralog, TSL1, that arose from the whole genome duplication
	-0.994910967112308	CAGL0F04895g		Ortholog(s) have glycogen phosphorylase activity, role in glycogen catabolic process, response to heat and cell surface, cytoplasm, hyphal cell wall localization	C7_00930W	GPH1	Putative glycogen phosphorylase; role in glycogen metabolism; regulated by Ssk1, Mig1, Tup1, Hap43; fluconazole-induced; localizes to cell surface of hyphae, not yeast; stationary phase enriched protein; Spider biofilm induced	YPR160W	GPH1	glycogen phosphorylase	Glycogen phosphorylase required for the mobilization of glycogen; non-essential; regulated by cyclic AMP-mediated phosphorylation; phosphorylation by Cdc28p may coordinately regulate carbohydrate metabolism and the cell cycle; expression is regulated by stress-response elements and by the HOG MAP kinase pathway
	-1.0895618131605	CAGL0K03421g		Ortholog(s) have phosphoglucomutase activity	CR_02820W	PGM2	Ortholog of S. cerevisiae Pgm2; induced in planktonic culture; Tye7p-regulated; flow model biofilm induced; rat catheter biofilm repressed	YMR105C	PGM2	phosphoglucomutase PGM2|GAL5	Phosphoglucomutase; catalyzes the conversion from glucose-1-phosphate to glucose-6-phosphate, which is a key step in hexose metabolism; functions as the acceptor for a Glc-phosphotransferase; protein abundance increases in response to DNA replication stress; PGM2 has a paralog, PGM1, that arose from the whole genome duplication
	-1.17454046290424	CAGL0F04719g		Ortholog(s) have glycogen (starch) synthase activity, role in glycogen biosynthetic process and cytoplasm, nucleus localization				YLR258W	GSY2	glycogen (starch) synthase GSY2	Glycogen synthase; expression induced by glucose limitation, nitrogen starvation, heat shock, and stationary phase; activity regulated by cAMP-dependent, Snf1p and Pho85p kinases as well as by the Gac1p-Glc7p phosphatase; GSY2 has a paralog, GSY1, that arose from the whole genome duplication; relocalizes from cytoplasm to plasma membrane upon DNA replication stress
	-1.50748360328791	CAGL0M14047g		Putative NADPH-dependent cinnamyl alcohol dehydrogenase; gene is upregulated in azole-resistant strain				YMR318C	ADH6	NADP-dependent alcohol dehydrogenase|ADHVI	NADPH-dependent medium chain alcohol dehydrogenase; has broad substrate specificity; member of the cinnamyl family of alcohol dehydrogenases; may be involved in fusel alcohol synthesis or in aldehyde tolerance; protein abundance increases in response to DNA replication stress
Ion Homeostasis	1.15772515878619	CAGL0F05709g		Ortholog(s) have role in bipolar cellular bud site selection, cellular cation homeostasis and cytoplasm, nucleus localization	C4_07150W		bZIP transcription factor; possibly transcriptionally regulated upon hyphal formation; Hap43; F-12/CO2 early biofilm induced; Spider biofilm induced	YDR184C	ATC1	LIC4	Nuclear protein; possibly involved in regulation of cation stress responses and/or in the establishment of bipolar budding pattern; relative distribution to the nucleus decreases upon DNA replication stress
	0.701551817717039	CAGL0D03322g		Ortholog(s) have role in cellular zinc ion homeostasis and endoplasmic reticulum localization	C6_03800C		Putative membrane protein with a predicted role in zinc ion homeostasis; Hap43-induced; fluconazole-induced; rat catheter and Spider biofilm induced	YLR023C	IZH3		Membrane protein involved in zinc ion homeostasis; member of the four-protein IZH family, expression induced by zinc deficiency; deletion reduces sensitivity to elevated zinc and shortens lag phase, overexpression reduces Zap1p activity
	0.610233674384078	CAGL0J05060g	ZAP1	Ortholog(s) have RNA polymerase II regulatory region sequence-specific DNA binding, RNA polymerase II transcription factor activity, sequence-specific DNA binding, zinc ion binding activity	C4_04850C	CSR1	Transcription factor; role in zinc homeostasis and regulation of Spider biofilm matrix; mutation affects filamentous growth; can suppress S. cerevisiae rok1 mutant inviability; Spider biofilm induced; mutants for abnormal Spider biofilms	YJL056C	ZAP1	ZRG10	Zinc-regulated transcription factor; binds to zinc-responsive promoters to induce transcription of certain genes in presence of zinc, represses other genes in low zinc; regulates its own transcription; contains seven zinc-finger domains
	0.592289125947622	CAGL0M06457g		Ortholog(s) have calcium ion transmembrane transporter activity and role in Golgi calcium ion homeostasis, calcium ion transmembrane transport, hyphal growth	C2_04540C	GDT1	Predicted Golgi Ca2+/H+ exchanger, involved in regulation of calcium homeostasis	YBR187W	GDT1	putative ribosome biosynthesis protein GDT1	Calcium transporter localized to the cis- and medial-Golgi apparatus; required for protein glycosylation; GFP-fusion protein localizes to the vacuole; TMEM165, a human gene which causes Congenital Disorders of Glycosylation is orthologous and functionally complements the null allele; expression pattern and physical interactions suggest a possible role in ribosome biogenesis; expression reduced in…
	0.56564757235697	CAGL0C01287g		Ortholog(s) have voltage-gated anion channel activity, role in DNA transport, cell redox homeostasis, ion transport and mitochondrial outer membrane localization				YIL114C	POR2	putative porin POR2|YVDAC2	Putative mitochondrial porin (voltage-dependent anion channel); not required for mitochondrial membrane permeability or mitochondrial osmotic stability; POR2 has a paralog, POR1, that arose from the whole genome duplication
	0.531960350938262	CAGL0C04565g		Ortholog(s) have ferrous iron binding activity, role in peptidyl-diphthamide biosynthetic process from peptidyl-histidine and cytosol, nucleus localization	C2_01060C		Protein with a predicted DnaJ chaperone domain and a CSL-type zinc finger; Spider biofilm induced	YJR097W	JJJ3	DPH4	Protein of unknown function; contains a CSL Zn finger and a DnaJ-domain; involved in diphthamide biosynthesis; ortholog human Dph4
	0.50533476558577	CAGL0E04092g	SIT1	Putative siderophore-iron transporter with 14 transmembrane domains; required for iron-dependent survival in macrophages; mRNA levels elevated under iron deficiency conditions; plasma membrane localized	C2_08050C	SIT1	Transporter of ferrichrome siderophores, not ferrioxamine B; required for human epithelial cell invasion in vitro, not for mouse systemic infection; regulated by iron, Sfu1, Rfg1, Tup1, Hap43; rat catheter and Spider biofilm induced	YHL040C	ARN1	siderophore transporter	ARN family transporter for siderophore-iron chelates; responsible for uptake of iron bound to ferrirubin, ferrirhodin, and related siderophores; protein increases in abundance and relocalizes to the vacuole upon DNA replication stress
	-0.543091872960751	CAGL0I06743g	FTR1	Putative ferrous iron transmembrane transporter involved in iron uptake	C1_14130W	FTR1	High-affinity iron permease; required for mouse virulence, low-iron growth; iron, amphotericin B, caspofungin, ciclopirox, Hog1p, Sef1p, Sfu1p, and Hap43p regulated; complements S. cerevisiae ftr1 iron transport; Hap43p-repressed	YER145C	FTR1	high-affinity iron permease FTR1	High affinity iron permease; involved in the transport of iron across the plasma membrane; forms complex with Fet3p; expression is regulated by iron; protein abundance increases in response to DNA replication stress
	-0.593956170531306	CAGL0J08613g		Ortholog(s) have calcium activated cation channel activity, calcium channel activity, potassium channel activity, sodium channel activity, voltage-gated ion channel activity	C2_07730W	YVC1	Putative vacuolar cation channel shock; repressed by alpha pheromone in SpiderM medium; flow model biofilm repressed	YOR087W	YVC1	TRPY1|YOR088W	Vacuolar cation channel; mediates release of Ca(2+) from the vacuole in response to hyperosmotic shock
	-0.63074927516294	CAGL0A03905g	HMX1	Ortholog(s) have heme oxygenase (decyclizing) activity and role in cellular iron ion homeostasis, heme catabolic process, response to carbon monoxide, response to oxidative stress	C1_00350C	HMX1	Heme oxygenase; utilization of hemin iron; transcript induced by heat, low iron, or hemin; repressed by Efg1; induced by low iron; upregulated by Rim101 at pH 8; Hap43-induced; Spider and flow model biofilm induced	YLR205C	HMX1		ER localized heme oxygenase; involved in heme degradation during iron starvation and in the oxidative stress response; expression is regulated by AFT1 and oxidative stress; relocates to the perinuclear region in the presence of oxidants
	-1.3557458261187	CAGL0K07337g		Has domain(s) with predicted ion channel activity, role in ion transport and membrane localization
Sulfur Metabolism	-0.744339241529489	CAGL0M04675g		Ortholog(s) have thiosulfate sulfurtransferase activity and endoplasmic reticulum, mitochondrial outer membrane localization				YOR285W	RDL1	thiosulfate sulfurtransferase RDL1	Thiosulfate sulfurtransferase; contains a rhodanese-like domain; localized to the mitochondrial outer membrane; protein abundance increases in response to DNA replication stress; similar to the human TSTD gene
Mitochondrial Function	1.04512959674209	CAGL0K07007g		Ortholog(s) have mRNA binding activity and role in aerobic respiration, filamentous growth of a population of unicellular organisms in response to neutral pH, single-species biofilm formation on inanimate substrate	C3_06700C		Putative mitochondrial protein with a predicted role in respiratory growth; fluconazole-induced; ketoconazole-repressed; mutants display a strong defect in flow model biofilm formation; Spider biofilm induced	YBR238C	YBR238C		Mitochondrial membrane protein; not required for respiratory growth but causes a synthetic respiratory defect in combination with rmd9 mutations; transcriptionally up-regulated by TOR; deletion increases life span; YBR238C has a paralog, RMD9, that arose from the whole genome duplication
	0.605251266810043	CAGL0A04631g		Ortholog of S. cerevisiae : YBL081W and Saccharomyces cerevisiae S288C : YBL081W				YBL081W	YBL081W		Non-essential protein of unknown function; null mutation results in a decrease in plasma membrane electron transport
	0.518927363228406	CAGL0M02101g		Ortholog(s) have role in aerobic respiration and mitochondrion localization				YPL159C	PET20		Mitochondrial protein; required for respiratory growth under some conditions and for stability of the mitochondrial genome
	-0.50812353104576	CAGL0L09108g		Ortholog(s) have role in propionate metabolic process and mitochondrial outer membrane localization				YPR002W	PDH1	putative 2-methylcitrate dehydratase	Putative 2-methylcitrate dehydratase; mitochondrial protein that participates in respiration; induced by diauxic shift; homologous to E. coli PrpD, may take part in the conversion of 2-methylcitrate to 2-methylisocitrate
	-0.50813493991759	CaglfMp10	ATP9	Subunit c of the F0 sector of mitochondrial inner membrane F1-F0 ATP synthase, encoded on the mitochondrial genome
	-0.515197815220416	CAGL0J02926g	PET117	Cytochrome c oxidase assembly factor; mutants are respiratory-deficient	C1_06840C		Ortholog(s) have role in mitochondrial respiratory chain complex IV assembly and mitochondrion localization	YER058W	PET117		Protein required for assembly of cytochrome c oxidase
	-0.56229891564587	CAGL0M06853g		Ortholog(s) have protein channel activity and role in protein complex assembly, protein import into mitochondrial outer membrane	C3_05770C	SAM50	Predicted component of the SAM complex involved in mitochondrial protein import	YNL026W	SAM50	SAM complex subunit SAM50|TOB55|OMP85	Component of the Sorting and Assembly Machinery (SAM) complex; the SAM (or TOB) complex is located in the mitochondrial outer membrane; the complex binds precursors of beta-barrel proteins and facilitates their outer membrane insertion; homologous to bacterial Omp85
	-0.578508902520681	CAGL0K07315g		Ortholog(s) have role in cellular copper ion homeostasis, mitochondrial respiratory chain complex IV assembly and mitochondrial intermembrane space, nucleus localization	CR_10280W		Protein with a predicted role in cytochrome c oxidase assembly; rat catheter biofilm induced	YMR244C-A	COA6		Protein involved in cytochrome c oxidase (Complex IV) assembly; involved in delivery of copper to Complex IV; also required for efficient formation of respiratory supercomplexes comprised of Complexes III and IV; localizes to the mitochondrial intermembrane space; ortholog implicated in cardiac defects in zebrafish and human; transcription is induced in response to the DNA-damaging agent MMS; pro…
	-0.636664814480654	CAGL0F04851g		Ortholog(s) have role in aerobic respiration, mRNA metabolic process and mitochondrial outer membrane localization	C3_03510C		Ortholog(s) have role in aerobic respiration, mRNA metabolic process and mitochondrial outer membrane localization	YPR155C	NCA2		Protein that regulates expression of Fo-F1 ATP synthase subunits; involved in the regulation of mitochondrial expression of subunits 6 (Atp6p) and 8 (Atp8p) of the Fo-F1 ATP synthase; functions with Nca3p
	-0.690579491380046	CAGL0G07315g		Ortholog(s) have role in mitochondrial respiratory chain complex IV assembly, mitochondrial respiratory chain supercomplex assembly	C5_03800W		Cytochrome c oxidase subunit; membrane-localized protein; rat catheter biofilm induced	YML030W	RCF1	AIM31	Cytochrome c oxidase subunit; required for assembly of the Complex III-Complex IV supercomplex, and for assembly of Cox13p and Rcf2p into cytochrome c oxidase; similar to Rcf2p, and either Rcf1p or Rcf2p is required for late-stage assembly of the Cox12p and Cox13p subunits and for cytochrome c oxidase activity; required for growth under hypoxic conditions; member of the hypoxia induced gene famil…
	-0.757585843093194	CAGL0J09262g		Ortholog(s) have ATPase binding activity, role in negative regulation of ATPase activity and mitochondrion localization				YDL130W-A	STF1	ATPase-binding protein|AIS2	Protein involved in regulation of the mitochondrial F1F0-ATP synthase; Stf1p and Stf2p act as stabilizing factors that enhance inhibitory action of the Inh1p protein; protein abundance increases in response to DNA replication stress; STF1 has a paralog, INH1, that arose from the whole genome duplication
	-0.993536239138734	CAGL0L08426g	SUE1	Ortholog(s) have role in protein catabolic process and mitochondrial envelope localization				YPR151C	SUE1		Protein required for degradation of unstable forms of cytochrome c; located in the mitochondria
	-1.89278232387373	CAGL0B01875g		Ortholog(s) have mitochondrial respiratory chain complex IV, mitochondrial respiratory chain supercomplex localization				YDR119W-A	COX26		Stabilizes or regulates formation of respiratory chain supercomplexes composed of Complex III (ubiquinol-cytochrome c reductase) and Complex IV (cytochrome c oxidase)
Cell Wall Organization	1.35433769981988	CAGL0J11242g		Ortholog(s) have GTP binding, GTPase activity and role in filamentous growth of a population of unicellular organisms, fungal-type cell wall organization	C1_06730W	RAC1	G-protein of RAC subfamily; required for embedded filamentous growth, not for serum-induced hyphal growth; dynamic localization at plasma membrane and nucleus; similar to, but not interchangeable with, Cdc42p; lacks S. cerevisiae homolog	YNL180C	RHO5	Rho family GTPase RHO5|YNS0	Non-essential small GTPase of the Rho/Rac family of Ras-like proteins; RAC1 ortholog; regulated by phosphorylation and ubiquitination; likely involved in protein kinase C (Pkc1p)-dependent signal transduction pathway that controls cell integrity
	0.956112754115728	CAGL0L05434g	SUN4	Ortholog(s) have role in fungal-type cell wall organization or biogenesis, mitochondrion organization and fungal-type cell wall, fungal-type vacuole localization
	0.94631202065907	CAGL0B00616g		Ecm33-family protein with a predicted role in cell wall biogenesis and organization; predicted GPI-anchor	C1_13290W		Ortholog(s) have role in ascospore wall assembly and ascospore wall, cytosol, endoplasmic reticulum, mitochondrion, prospore membrane localization	YCL048W	SPS22		Protein of unknown function; SPS22 has a paralog, SPS2, that arose from the whole genome duplication; redundant with Sps2p for the organization of the beta-glucan layer of the spore wall
	0.746182578776954	CAGL0E01595g		Putative glycoside hydrolase of the Gas/Phr family; predicted GPI-anchor	C4_00090W	PHR3	Putative beta-1,3-glucanosyltransferase with similarity to the A. fumigatus GEL family; fungal-specific (no human or murine homolog); possibly an essential gene, disruptants not obtained by UAU1 method	YOL132W	GAS4	1,3-beta-glucanosyltransferase	1,3-beta-glucanosyltransferase; involved with Gas2p in spore wall assembly; has similarity to Gas1p; localizes to the cell wall
	0.744786343012577	CAGL0I06644g		Putative GPI-linked cell wall protein				YER150W	SPI1		GPI-anchored cell wall protein involved in weak acid resistance; basal expression requires Msn2p/Msn4p; expression is induced under conditions of stress and during the diauxic shift; SPI1 has a paralog, SED1, that arose from the whole genome duplication
	0.711270001152271	CAGL0G00858g		Ortholog(s) have transmembrane signaling receptor activity				YLR332W	MID2	KAI1	O-glycosylated plasma membrane protein; acts as a sensor for cell wall integrity signaling and activates the pathway; interacts with Rom2p, a guanine nucleotide exchange factor for Rho1p, and with cell integrity pathway protein Zeo1p; MID2 has a paralog, MTL1, that arose from the whole genome duplication
	0.563737117785083	CAGL0F03003g		Ortholog(s) have osmosensor activity and role in (1->3)-beta-D-glucan biosynthetic process, cellular bud site selection, fungal-type cell wall organization, hyperosmotic response, osmosensory signaling pathway via Sho1 osmosensor				YDR420W	HKR1		Mucin family member that functions as an osmosensor in the HOG pathway; large, highly glycosylated protein that functions redundantly with Msb2p in Sho1p-mediated osmostresss induction of the HOG signaling pathway; cytoplasmic domain interacts with Ahk1p a scaffold protein that prevents cross talk with the Kss1p MAPK of the filamentous growth pathway; mutant displays defects in beta-1,3 glucan sy…
	0.524385327237525	CAGL0L11836g		Ortholog(s) have role in G1/S transition of mitotic cell cycle, positive regulation of gene expression, regulation of cell cycle and cytoplasm, nucleus localization	C1_10350C		Putative adhesin-like protein; positively regulated by Tbf1; Spider biofilm induced	YER167W	BCK2	CTR7	Serine/threonine-rich protein involved in PKC1 signaling pathway; protein kinase C (PKC1) signaling pathway controls cell integrity; overproduction suppresses pkc1 mutations
	0.502040894166657	CAGL0H07997g	KNH1	Protein involved in cell wall beta 1,6-glucan synthesis, similar to Kre9p,
	-0.571362210970161	CAGL0G05566g		Ortholog(s) have role in ascospore formation, cellular response to drug, fungal-type cell wall organization	C7_02240W	FMP45	Predicted membrane protein induced during mating; mutation confers hypersensitivity to toxic ergosterol analog, to amphotericin B; alkaline repressed; repressed by alpha pheromone in SpiderM medium; rat catheter, Spider biofilm induced	YDL222C	FMP45		Integral membrane protein localized to mitochondria; required for sporulation and maintaining sphingolipid content; similar to SUR7; FMP45 has a paralog, YNL194C, that arose from the whole genome duplication
Stress Response	0.760293977137678	CAGL0J00891g		Putative protein required for growth at low temperature; gene is downregulated in azole-resistant strain
	0.529202818545733	CAGL0M03663g		Ortholog(s) have role in ascospore formation, cellular response to alkaline pH, cellular response to lithium ion and cellular response to neutral pH, more	C5_01950C	RIM21	Plasma membrane pH-sensor involved in the Rim101 pH response pathway; required for processing and activation of Rim101 and for alkaline pH-induced hyphal growth; Spider biofilm induced	YNL294C	RIM21	PAL2	pH sensor molecule, component of the RIM101 pathway; has a role in cell wall construction and alkaline pH response; is glycosylated and phosphorylated; interacts with Dfg16p and Rim9p to form a pH-sensing complex; localization to the plasma membrane is dependent on Dfg16p and Rim9p; has similarity to A. nidulans PalH
	0.515747910736277	CAGL0M06919g		Ortholog(s) have Golgi apparatus, cytosol localization	CR_02430C		Predicted protein of rapamycin resistance; Spider biofilm induced	YNL023C	FAP1		Protein that binds to Fpr1p; confers rapamycin resistance by competing with rapamycin for Fpr1p binding; accumulates in the nucleus upon treatment of cells with rapamycin; has similarity to D. melanogaster shuttle craft and human NFX1
	-0.508098752732352	CAGL0J00561g		Ortholog(s) have role in chromatin silencing by small RNA, endoplasmic reticulum unfolded protein response and cytosol, nucleus localization	C6_03320W		Stationary phase enriched protein; Gcn4-regulated; induced by amino acid starvation (3-AT), benomyl or in azole-resistant strain that overexpresses MDR1; flow model biofilm induced; rat catheter biofilm repressed; overlaps orf19.5621	YHR029C	YHI9		Protein of unknown function; null mutant is defective in unfolded protein response; possibly involved in a membrane regulation metabolic pathway; member of the PhzF superfamily, though most likely not involved in phenazine production
	-0.526299897531897	CAGL0J04092g		Ortholog(s) have role in positive regulation of cellular response to hypoxia, protein localization to Golgi apparatus, protein processing, regulation of protein glycosylation	CR_05460W		Ortholog(s) have role in positive regulation of cellular response to hypoxia, protein localization to Golgi apparatus, protein processing, regulation of protein glycosylation	YOR223W	DSC3		Subunit of the DSC ubiquitin ligase complex; protein of unknown function that localizes to the ER and vacuole lumen; overexpression affects endocytic protein trafficking; ortholog of fission yeast dsc3
	-0.536454157220742	CAGL0F08745g		Ortholog(s) have role in cellular response to desiccation and cytoplasm localization				YGR008C	STF2	ATPase-stabilizing factor family protein	Protein involved in resistance to desiccation stress; Stf2p exhibits antioxidant properties, and its overexpression prevents ROS accumulation and apoptosis; binds to F0 sector of mitochondrial F1F0 ATPase in vitro and may modulate the inhibitory action of Inh1p and Stf1p; protein abundance increases in response to DNA replication stress; STF2 has a paralog, TMA10, that arose from the whole genome…
	-0.548452795808447	CAGL0L10186g		Putative stress-induced protein; gene is upregulated in azole-resistant strain	C2_02920W		Putative adhesin-like protein; upregulated during growth in the mouse cecum; flow model, rat catheter and Spider biofilm induced	YOR052C	TMC1	YOR29-03	AN1-type zinc finger protein, effector of proteotoxic stress response; stress-inducible transcriptional target of Rpn4p; induced by nitrogen limitation, weak acid, misfolded proteins; short-lived protein, degraded by proteasome; may protect cells from trivalent metalloid induced proteotoxicity; contains PACE promoter element; ortholog of human AIRAP, which stimulates proteasome activity in respon…
	-0.621148093432121	CAGL0K11858g		Putative flavodoxin	CR_05390W	PST3	Flavodoxin-like protein involved in oxidative stress protection and virulence; YNB biofilm induced; stationary phase enriched protein; rat catheter and Spider biofilm repressed	YDR032C	PST2	flavodoxin-like fold family protein	Protein with similarity to a family of flavodoxin-like proteins; induced by oxidative stress in a Yap1p dependent manner; the authentic, non-tagged protein is detected in highly purified mitochondria in high-throughput studies; protein abundance increases in response to DNA replication stress; PST2 has a paralog, RFS1, that arose from the whole genome duplication
	-0.640192071415576	CAGL0K12958g		Putative stress-induced alcohol dehydrogenase; gene is upregulated in azole-resistant strain
	-0.719394861208833	CAGL0H04037g		Ortholog(s) have heat shock protein binding, protein phosphatase regulator activity and role in glycogen metabolic process, meiotic nuclear division, mitotic spindle assembly checkpoint, response to heat	C7_00660W	GAC1	Putative regulatory subunit of ser/thr phosphoprotein phosphatase 1; fluconazole-induced; caspofungin repressed; transcript induced by Mnl1 under weak acid stress; regulated by Nrg1, Tup1; Spider and flow model biofilm induced	YOR178C	GAC1	protein phosphatase regulator GAC1	Regulatory subunit for Glc7p type-1 protein phosphatase (PP1); tethers Glc7p to Gsy2p glycogen synthase, binds Hsf1p heat shock transcription factor, required for induction of some HSF-regulated genes under heat shock; GAC1 has a paralog, PIG1, that arose from the whole genome duplication
	-0.724978232307971	CAGL0M04763g		Ortholog(s) have role in cellular response to drug and cytosol, nucleus localization	C2_00770W		Putative protein of unknown function; Hap43p-repressed gene; mutation confers hypersensitivity to toxic ergosterol analog, and to amphotericin B	YOR289W	YOR289W		Putative protein of unknown function; transcription induced by the unfolded protein response; green fluorescent protein (GFP)-fusion protein localizes to both the cytoplasm and the nucleus
	-0.753932824078071	CAGL0K01903g		Ortholog(s) have cellular bud, plasma membrane localization				YDL012C	YDL012C		Tail-anchored plasma membrane protein with a conserved CYSTM module; possibly involved in response to stress; may contribute to non-homologous end-joining (NHEJ) based on ydl012c htz1 double null phenotype; YDL012C has a paralog, YBR016W, that arose from the whole genome duplication
	-0.927986221299448	CAGL0F07953g		Ortholog(s) have endoplasmic reticulum, mitochondrion localization				YGR236C	SPG1		Protein required for high temperature survival during stationary phase; not required for growth on nonfermentable carbon sources; the authentic, non-tagged protein is detected in highly purified mitochondria in high-throughput studies
	-1.05634213274285	CAGL0D00154g	AQY1	Has domain(s) with predicted transporter activity, role in transport and membrane localization
Biofilm Formation	1.55907407610094	CAGL0E06644g	EPA1	Sub-telomerically encoded adhesin with a role in cell adhesion; GPI-anchored cell wall protein; N-terminal ligand binding domain binds to ligands containing a terminal galactose residue; belongs to adhesin cluster I
	1.03625165816196	CAGL0M07634g		Ortholog(s) have sequence-specific DNA binding, transcription factor activity, sequence-specific DNA binding activity	CR_07890W	EFG1	bHLH transcription factor; required for white-phase cell type, RPMI and Spider biofilm formation, hyphal growth, cell-wall gene regulation; roles in adhesion, virulence; Cph1 and Efg1 have role in host cytokine response; binds E-box	YMR016C	SOK2		Nuclear protein that negatively regulates pseudohyphal differentiation; plays a regulatory role in the cyclic AMP (cAMP)-dependent protein kinase (PKA) signal transduction pathway; relocalizes to the cytosol in response to hypoxia; SOK2 has a paralog, PHD1, that arose from the whole genome duplication
	0.79099513346569	CAGL0M01716g		Ortholog(s) have RNA polymerase II core promoter proximal region sequence-specific DNA binding, transcription factor activity and RNA polymerase II transcription factor recruiting, more	C3_04530C	TEC1	TEA/ATTS transcription factor; white cell pheromone response, hyphal gene regulation; required for Spider and RPMI biofilm formation; regulates BCR1; Cph2 regulated transcript; alkaline, rat catheter, Spider, flow model biofilm induced	YBR083W	TEC1	ROC1	Transcription factor targeting filamentation genes and Ty1 expression; Ste12p activation of most filamentation gene promoters depends on Tec1p and Tec1p transcriptional activity is dependent on its association with Ste12p; binds to TCS elements upstream of filamentation genes, which are regulated by Tec1p/Ste12p/Dig1p complex; competes with Dig2p for binding to Ste12p/Dig1p; positive regulator of…
	0.779360185422105	CAGL0E06688g	EPA3	Epithelial adhesion protein; belongs to adhesin cluster I; GPI-anchored
	0.76210674679563	CAGL0E06600g		Putative adhesin-like protein; belongs to adhesin cluster V
	0.724095356139578	CAGL0I00220g	EPA23	Predicted GPI-linked adhesin-like protein; belongs to adhesin cluster I
	0.694452999887612	CAGL0L00583g		Ortholog(s) have sequence-specific DNA binding, transcription factor activity, sequence-specific DNA binding activity	CR_06440C	BCR1	Transcription factor; regulates a/alpha biofilm formation, matrix, cell-surface-associated genes; confers adherence, impermeability, impenetrability, fluconazole resistance; Tup1/Tec1/Mnl1-regulated; mRNA binds She3; Spider biofilm induced	YPL230W	USV1	NSF1	Putative transcription factor containing a C2H2 zinc finger; mutation affects transcriptional regulation of genes involved in growth on non-fermentable carbon sources, response to salt stress and cell wall biosynthesis; USV1 has a paralog, RGM1, that arose from the whole genome duplication
	0.621649049809828	CAGL0F08833g		Putative adhesin-like protein	C2_01780W	MSB2	Mucin family adhesin-like protein; cell wall damage sensor; required for Cek1 phosphorylation by cell wall stress; Rim101-repressed; activation releases extracellular domain into medium; Spider biofilm induced	YGR014W	MSB2		Mucin family member involved in various signaling pathways; functions as osmosensor in the Sho1p-mediated HOG pathway; functions in Cdc42p- and MAP kinase-dependent filamentous growth signaling pathway; processed into secreted and cell-associated forms by aspartyl protease Yps1p; potential Cdc28p substrate
	0.60719459547408	CAGL0L12782g	DIG1	Ortholog(s) have DNA binding, transcription factor binding activity				YPL049C	DIG1	RST1	MAP kinase-responsive inhibitor of the Ste12p transcription factor; involved in the regulation of mating-specific genes and the invasive growth pathway; related regulators Dig1p and Dig2p bind to Ste12p; DIG1 has a paralog, DIG2, that arose from the whole genome duplication
	0.515748437144475	CAGL0F08195g		Ortholog(s) have sequence-specific DNA binding, transcription factor activity, sequence-specific DNA binding activity	C5_04830W	SFL2	Transcription factor involved in regulation of morphogenesis; required for filamentous growth, for virulence in RHE model but not in mice; induced upon RHE infection but C. dubliniensis ortholog is not; Spider biofilm induced	YGR249W	MGA1		Protein similar to heat shock transcription factor; multicopy suppressor of pseudohyphal growth defects of ammonium permease mutants
	-0.536427423504766	CAGL0I07887g		Ortholog(s) have protein binding, bridging activity and role in CVT pathway, ER-associated ubiquitin-dependent protein catabolic process, protein complex localization, protein processing, vesicle organization				YOL082W	ATG19	CVT19	Receptor protein for the cytoplasm-to-vacuole targeting (Cvt) pathway; delivers cargo proteins aminopeptidase I (Ape1p) and alpha-mannosidase (Ams1p) to the phagophore assembly site for packaging into Cvt vesicles; interaction with Atg19p during the Cvt pathway requires phosphorylation by Hrr25p
	-0.802126731450153	CAGL0M14069g	PWP6	Adhesin-like protein with similarity to S. cerevisiae flocculins, cell wall proteins that mediate adhesion; predicted GPI anchor; belongs to adhesin cluster II
	-0.865037444518809	CAGL0I11011g		Putative adhesin; belongs to adhesin cluster V
	-1.89443449500087	CAGL0L13299g	EPA11	Putative adhesin; belongs to adhesin cluster I
	-2.04520453601744	CAGL0L13332g	EPA13	Sub-telomerically encoded lectin-like adhesin with a role in cell adhesion; contains multiple tandem repeats; predicted GPI-anchor; belongs to adhesin cluster I
Cytoskeleton/Cell Cycle	0.874187663412466	CAGL0F05093g		Ortholog(s) have role in microtubule-based process and cytoplasm localization	C5_00250C		Protein with a predicted role in microtubule-related processes; Spider biofilm induced	YLR412W	BER1		Protein involved in microtubule-related processes; GFP-fusion protein localizes to the cytoplasm and is induced in response to the DNA-damaging agent MMS; YLR412W is not an essential gene; similar to Arabidopsis SRR1 gene
	0.745976373152271	CAGL0F08129g	SDA1	Ortholog(s) have role in actin cytoskeleton organization, ribosomal large subunit biogenesis, ribosomal large subunit export from nucleus, traversing start control point of mitotic cell cycle and nucleolus localization	CR_05660W	SDA1	Predicted nuclear protein involved in actin cytoskeleton organization, passage through Start, 60S ribosome biogenesis; rat catheter biofilm induced; Hap43-induced	YGR245C	SDA1		Protein required for actin organization and passage through Start; highly conserved nuclear protein; required for actin cytoskeleton organization; plays a critical role in G1 events; binds Nap1p; involved in 60S ribosome biogenesis
	0.741417940575036	CAGL0M01628g	SAC7	Ortholog(s) have GTPase activator activity	C7_00080C	SAC7	Putative GTPase activating protein (GAP) for Rho1; repressed upon adherence to polystyrene; macrophage/pseudohyphal-repressed; transcript is upregulated in RHE model of oral candidiasis and in clinical oral candidiasis	YDR389W	SAC7		GTPase activating protein (GAP) for Rho1p; regulator of a Tor2p-mediated, Rho1p GTPase switch that controls organization of the actin cytoskeleton; negative regulator of the RHO1-PKC1-MAPK cell integrity (CWI) and membrane fluidity homeostasis signaling pathways; potential Cdc28p substrate; SAC7 has a paralog, BAG7, that arose from the whole genome duplication
	0.720703640134258	CAGL0F06853g		Ortholog(s) have protein kinase inhibitor activity and role in negative regulation of protein kinase activity, regulation of actin cytoskeleton organization, regulation of microtubule cytoskeleton organization, ribosome biogenesis
	0.720534592064609	CAGL0I03586g		Ortholog(s) have role in reciprocal meiotic recombination and nucleus localization	C4_02820W		Ortholog(s) have role in reciprocal meiotic recombination and nucleus localization	YDL154W	MSH5	MutS family protein MSH5	Protein of the MutS family; forms a dimer with Msh4p that facilitates crossovers between homologs during meiosis; msh5-Y823H mutation confers tolerance to DNA alkylating agents; homologs present in C. elegans and humans
	0.709300482917597	CAGL0M01210g		Ortholog(s) have Rix1 complex, mitotic spindle pole body, nuclear heterochromatin localization
	0.68883335589271	CAGL0M11990g		Ortholog(s) have cyclin-dependent protein serine/threonine kinase regulator activity	C5_01100C	CLN3	G1 cyclin; depletion abolishes budding and causes hyphal growth defects; farnesol regulated, functional in S. cerevisiae; possibly essential (UAU1 method); other biofilm induced; Spider biofilm induced	YAL040C	CLN3	cyclin CLN3|WHI1|FUN10|DAF1
	0.656074586315657	CAGL0I07711g		Ortholog(s) have structural molecule activity, role in ascospore-type prospore membrane assembly and meiotic spindle pole body localization				YOL091W	SPO21	MPC70	Component of the meiotic outer plaque of the spindle pole body; involved in modifying the meiotic outer plaque that is required prior to prospore membrane formation; SPO21 has a paralog, YSW1, that arose from the whole genome duplication
	0.656074586315657	CAGL0I07711g		Ortholog(s) have structural molecule activity, role in ascospore-type prospore membrane assembly and meiotic spindle pole body localization				YOL091W	SPO21	MPC70	Component of the meiotic outer plaque of the spindle pole body; involved in modifying the meiotic outer plaque that is required prior to prospore membrane formation; SPO21 has a paralog, YSW1, that arose from the whole genome duplication
	0.654744660644332	CAGL0B04235g	SCP120	Protein with a predicted role in maintenance of ploidy
	0.638599890049064	CAGL0L11594g		Ortholog(s) have protein kinase activity	C1_10950C		Putative serine/threonine-protein kinase; possibly an essential gene, disruptants not obtained by UAU1 method	YOR119C	RIO1	protein kinase RIO1|RRP10	Serine kinase involved in cell cycle regulation and rDNA integrity; associated with late pre-40S particles via its conserved C-terminal domain and participates in late 40S biogenesis; association with pre-40S particles regulated by its catalytic ATPase site and likely occurs after the release of Rio2p from these particles; involved in cell cycle progression and processing of the 20S pre-rRNA into…
	-0.539027432712847	CAGL0J00803g		Ortholog(s) have structural constituent of cytoskeleton activity	CR_05920C	MHP1	Protein similar to S. cerevisiae Mhp1p, which is involved in microtubule stabilization; transposon mutation affects filamentous growth; possibly transcriptionally regulated upon hyphal formation; possibly an essential gene (by UAU1 method)	YJL042W	MHP1		Microtubule-associated protein involved in microtubule organization; involved in assembly and stabilization of microtubules; overproduction results in cell cycle arrest at G2 phase; similar to Drosophila protein MAP and to mammalian MAP4 proteins
	-0.543301670555082	CAGL0I09482g		Ortholog(s) have role in sporulation resulting in formation of a cellular spore, ubiquitin-dependent protein catabolic process and endoplasmic reticulum, nuclear envelope localization	C1_01890C		Putative UBX-domain (ubiquitin-regulatory domain) protein; macrophage-downregulated gene	YBR273C	UBX7	CUI3	UBX (ubiquitin regulatory X) domain-containing protein; interacts with Cdc48p; UBX7 has a paralog, UBX6, that arose from the whole genome duplication
	-0.598890507409945	CAGL0L13222g		Ortholog(s) have cyclin-dependent protein serine/threonine kinase inhibitor activity				YLR079W	SIC1	BYC1|cyclin-dependent protein serine/threonine kinase inhibiting protein SIC1|SDB25
	-0.599218679091192	CAGL0G05049g		Ortholog(s) have Arp2/3 complex binding activity, role in actin cortical patch assembly, actin filament debranching, negative regulation of Arp2/3 complex-mediated actin nucleation and actin cortical patch, cytosol, nucleus localization	C6_00660C		Ortholog(s) have Arp2/3 complex binding activity, role in actin cortical patch assembly, actin filament debranching, negative regulation of Arp2/3 complex-mediated actin nucleation and actin cortical patch, cytosol, nucleus localization	YDR063W	AIM7	GMF1|GMF	Protein that interacts with Arp2/3 complex; interacts with Arp2/3 complex to stimulate actin filament debranching and inhibit actin nucleation; has similarity to Cof1p and also to human glia maturation factor (GMF); null mutant displays elevated mitochondrial genome loss
	-0.708171420125697	CAGL0J10846g		Ortholog(s) have cyclin-dependent protein serine/threonine kinase regulator activity	C5_05190W	PCL5	Putative cyclin for Pho85 kinase; Gcn4-induced; suppresses toxicity of C. albicans Gcn4 overproduction in S. cerevisiae via increased Pho85-dependent phosphorylation and degradation of Gcn4; rat catheter and Spider biofilm induced	YHR071W	PCL5
	-0.747000627212695	CAGL0G03047g		Ortholog(s) have protein kinase activity involved in regulation of protein localization to cell division site involved in cytokinesis, protein serine/threonine kinase activity	C2_06670C	DBF2	Essential serine/threonine protein kinase involved in mitotic spindle formation and cytokinesis; required for septum formation, exit from mitosis, and normal hyphal morphogenesis; virulence-group-correlated expression	YGR092W	DBF2	serine/threonine-protein kinase DBF2	Ser/Thr kinase involved in transcription and stress response; functions as part of a network of genes in exit from mitosis; localization is cell cycle regulated; activated by Cdc15p during the exit from mitosis; also plays a role in regulating the stability of SWI5 and CLB2 mRNAs; phosphorylates Chs2p to regulate primary septum formation and Hof1p to regulate cytokinesis; DBF2 has a paralog, DBF2…
	-0.828584392262765	CAGL0K08668g	MET28	bZIP domain-containing protein	C7_00730W	MET28	Predicted bZIP domain-containing transcription factor; protein induced during the mating process; possibly essential, disruptants not obtained by UAU1 method; Hap43-repressed; rat catheter biofilm induced	YIR017C	MET28		bZIP transcriptional activator in the Cbf1p-Met4p-Met28p complex; participates in the regulation of sulfur metabolism
Protein Binding/Proteasome	0.732153664217618	CAGL0F06809g		Ortholog(s) have protein tyrosine phosphatase activity	CR_03570C	YVH1	Putative dual specificity phosphatase (phosphoserine/threonine and phosphotyrosine phosphatase); required for wild-type growth rate and for wild-type virulence in mouse model of systemic infection; Hap43p-induced gene	YIR026C	YVH1	tyrosine protein phosphatase YVH1	Dual specificity protein phosphatase; regulates growth, sporulation, and glycogen accumulation in a cAMP-dependent protein kinase cascade dependent manner; mutants are defective in 60S ribosome assembly; positively regulates pre-autophagosomal structure (PAS) formation upon nitrogen starvation or rapamycin treatment
	0.695370455046474	CAGL0L06468g		Ortholog(s) have role in SCF-dependent proteasomal ubiquitin-dependent protein catabolic process and SCF ubiquitin ligase complex localization				YDR131C	YDR131C		F-box protein subunit of SCF ubiquitin ligase complex; substrate-specific adaptor subunit that recruits substrates to a core ubiquitination complex
	0.688947695661827	CAGL0G01320g		Ortholog(s) have MAP kinase tyrosine/serine/threonine phosphatase activity, protein tyrosine phosphatase activity	C1_10000C	CPP1	VH1 family MAPK phosphatase; regulates Cst20-Hst7-Cek1-Cph1 filamentation pathway; represses yeast-hyphal switch; required for virulence in mice; yeast-enriched; induced by alpha pheromone in SpiderM medium; Spider biofilm induced	YNL053W	MSG5	tyrosine/serine/threonine protein phosphatase MSG5	Dual-specificity protein phosphatase; exists in 2 isoforms; required for maintenance of a low level of signaling through the cell integrity pathway, adaptive response to pheromone; regulates and is regulated by Slt2p; dephosphorylates Fus3p; MSG5 has a paralog, SDP1, that arose from the whole genome duplication
	0.67162129907528	CAGL0I09438g		Ortholog(s) have protein-lysine N-methyltransferase activity, role in peptidyl-lysine dimethylation, positive regulation of translational termination and cytosol, nucleus localization	C2_02960C		Ortholog(s) have protein-lysine N-methyltransferase activity, role in peptidyl-lysine dimethylation, positive regulation of translational termination and cytosol, nucleus localization	YBR271W	EFM2	S-adenosylmethionine-dependent methyltransferase	S-adenosylmethionine-dependent methyltransferase; seven-beta-strand lysine methyltransferase which dimethylates translation elongation factor EF2 (Eft1p and Eft2p) at lysine 613 and methylates EF3 (Yef3p) at lysine 187; green fluorescent protein (GFP)-fusion protein localizes to the cytoplasm; involved in regulation of translational termination; predicted involvement in ribosome biogenesis
	0.64942877903045	CAGL0G01969g		Ortholog(s) have phosphopantothenoylcysteine decarboxylase activity, protein phosphatase inhibitor activity and role in regulation of mitotic cell cycle, response to salt stress	C3_05970C		Ortholog(s) have phosphopantothenoylcysteine decarboxylase activity, protein phosphatase inhibitor activity and role in regulation of mitotic cell cycle, response to salt stress	YKR072C	SIS2	phosphopantothenoylcysteine decarboxylase complex subunit SIS2|HAL3	Negative regulatory subunit of protein phosphatase 1 (Ppz1p); involved in coenzyme A biosynthesis; subunit of phosphopantothenoylcysteine decarboxylase (PPCDC: Cab3p, Sis2p, Vhs3p) complex and the CoA-Synthesizing Protein Complex (CoA-SPC: Cab2p, Cab3p, Cab4p, Cab5p, Sis2p and Vhs3p); SIS2 has a paralog, VHS3, that arose from the whole genome duplication
	0.583470585456658	CAGL0L13156g		Ortholog(s) have enzyme inhibitor activity, role in regulation of ubiquitin homeostasis and endosome localization				YLR073C	RFU1		Protein that inhibits Doa4p deubiquitinating activity; contributes to ubiquitin homeostasis by regulating the conversion of free ubiquitin chains to ubiquitin monomers by Doa4p; GFP-fusion protein localizes to endosomes
	0.582445040186748	CAGL0J05896g		Ortholog(s) have mannosyltransferase activity, role in GPI anchor biosynthetic process and integral component of endoplasmic reticulum membrane, mannosyltransferase complex, nuclear envelope localization				YNL158W	PGA1		Essential component of GPI-mannosyltransferase II; complex is responsible for second mannose addition to GPI precursors as a partner of Gpi18p; required for maturation of Gas1p and Pho8p; has synthetic genetic interactions with secretory pathway genes
	0.577685388760893	CAGL0I07997g		Ortholog(s) have peptide alpha-N-acetyltransferase activity and role in N-terminal peptidyl-methionine acetylation, cytoskeleton organization, mitochondrion inheritance, regulation of actin cytoskeleton organization	C1_00380C		Ortholog(s) have peptide alpha-N-acetyltransferase activity and role in N-terminal peptidyl-methionine acetylation, cytoskeleton organization, mitochondrion inheritance, regulation of actin cytoskeleton organization	YOL076W	MDM20	NAA25|DEC1
	0.54185573582404	CAGL0C04235g		Ortholog(s) have dolichyl-phosphate-mannose-glycolipid alpha-mannosyltransferase activity and role in GPI anchor biosynthetic process	C1_04280C		Ortholog(s) have dolichyl-phosphate-mannose-glycolipid alpha-mannosyltransferase activity and role in GPI anchor biosynthetic process	YBR004C	GPI18	GPI-anchor transamidase GPI18|FMP44	Functional ortholog of human PIG-V; PIG-V is a mannosyltransferase that transfers the second mannose in glycosylphosphatidylinositol biosynthesis; the authentic, non-tagged protein was localized to mitochondria
	0.530608990877248	CAGL0M12749g		Putative shared subunit of Cop9 signalosome and eIF3; gene is upregulated in azole-resistant strain				YIL071C	PCI8	YIL071W|CSN11|YIH1	Possible shared subunit of Cop9 signalosome (CSN) and eIF3; binds eIF3b subunit Prt1p, has possible dual functions in transcriptional and translational control, contains a PCI (Proteasome-COP9 signalosome (CSN)-eIF3) domain
	0.529854721479566	CAGL0J00473g		Ortholog(s) have proteasome binding, protein binding, bridging activity, role in protein catabolic process and nucleolus, preribosome, large subunit precursor, proteasome complex localization	C6_01170W	CIC1	Putative proteasome-interacting protein; rat catheter biofilm induced	YHR052W	CIC1	NSA3	Essential protein that interacts with proteasome components; has a potential role in proteasome substrate specificity; also copurifies with 66S pre-ribosomal particles
	0.522690013169061	CAGL0B02882g	BMT2	Beta mannosyltransferase; transmembrane domain protein similar to C. albicans WRY family; gene is downregulated in azole-resistant strain
	-0.504341405400261	CAGL0H10362g		Ortholog(s) have protein binding, bridging activity, role in proteasome regulatory particle assembly and cytoplasm, nucleus, ribosome localization	C4_03770W		Ortholog(s) have protein binding, bridging activity, role in proteasome regulatory particle assembly and cytoplasm, nucleus, ribosome localization	YDL110C	TMA17	ADC17	ATPase dedicated chaperone that adapts proteasome assembly to stress; Tma17p is induced upon stress; interacts with Rpt6p to assist its pairing to Rpt3p and early steps in proteasome biogenesis; associates with ribosomes; heterozygous deletion demonstrated increases in chromosome instability in a rad9 deletion background; protein abundance is decreased upon intracellular iron depletion
	-0.524146706834474	CAGL0C04609g		Ortholog(s) have thiol-dependent ubiquitin-specific protease activity, role in protein deubiquitination and cytosol, nucleus localization	C1_06390W		Putative ubiquitin C-terminal hydrolase; regulated by Gcn2p and Gcn4p	YJR099W	YUH1	ubiquitin-specific protease YUH1	Ubiquitin C-terminal hydrolase; cleaves ubiquitin-protein fusions to generate monomeric ubiquitin; hydrolyzes the peptide bond at the C-terminus of ubiquitin; also the major processing enzyme for the ubiquitin-like protein Rub1p
	-0.53193532420056	CAGL0A02024g		Ortholog(s) have role in negative regulation of ubiquitin-protein transferase activity, replicative cell aging and mitochondrion localization				YOL025W	LAG2	ECM36	Protein that negatively regulates the SCF E3-ubiquitin ligase; regulates by interacting with and preventing neddyation of the cullin subunit, Cdc53p; longevity determinant that is preferentially expressed in young cells; similar to mammalian Cand1
	-0.633614603227208	CAGL0G09020g		Ortholog(s) have cAMP-dependent protein kinase activity	C2_07210C	TPK2	cAMP-dependent protein kinase catalytic subunit; isoform of Tpk1; involved in regulation of filamentation, phenotypic switching and mating; needed for epithelial cell damage, engulfment and oral virulence in mice	YPL203W	TPK2	cAMP-dependent protein kinase catalytic subunit TPK2|PKA3|YKR1|PKA2	cAMP-dependent protein kinase catalytic subunit; promotes vegetative growth in response to nutrients via the Ras-cAMP signaling pathway; partially redundant with Tpk1p and Tpk3p; localizes to P-bodies during stationary phase; relocalizes to the cytosol in response to hypoxia
	-0.681763530225046	CAGL0E02651g		Ortholog(s) have endoplasmic reticulum localization				YOR003W	YSP3	putative subtilisin-like protease YSP3	Putative precursor of the subtilisin-like protease III; SWAT-GFP and mCherry fusion proteins localize to the endoplasmic reticulum; YSP3 has a paralog, PRB1, that arose from the whole genome duplication
	-0.686296969024126	CAGL0K05813g		Ortholog(s) have glutathione disulfide oxidoreductase activity, glutathione peroxidase activity, glutathione transferase activity and role in glutathione metabolic process, pathogenesis, removal of superoxide radicals	C1_00490C	TTR1	Putative glutaredoxin; described as a glutathione reductase; induced by human neutrophils and benomyl treatment; alkaline repressed; regulated by Gcn2 and Gcn4; required for virulence in mouse model; Spider biofilm induced	YDR513W	GRX2	dithiol glutaredoxin GRX2|TTR1	Cytoplasmic glutaredoxin; thioltransferase, glutathione-dependent disulfide oxidoreductase involved in maintaining redox state of target proteins, also exhibits glutathione peroxidase activity, expression induced in response to stress; GRX2 has two in-frame start codons resulting in a shorter isoform that is retained in the cytosol and a longer form translocated to the mitochondrial matrix; GRX2 …
	-0.688904978429109	CAGL0F02255g		Ortholog(s) have protein phosphatase activator activity, protein serine/threonine phosphatase inhibitor activity	C1_14190C		Protein phosphatase inhibitor; Hap43-repressed; homozygous Tn insertion decreases colony wrinkling but does not block hyphal growth in liquid media; mutation confers hypersensitivity to toxic ergosterol analog; Spider biofilm induced	YFR003C	YPI1	type 1 protein phosphatase-activating protein YPI1	Regulatory subunit of the type I protein phosphatase (PP1) Glc7p; Glc7p participates in the regulation of a variety of metabolic processes including mitosis and glycogen metabolism; in vitro evidence suggests Ypi1p is an inhibitor of Glc7p while in vivo evidence suggests it is an activator; overproduction causes decreased cellular content of glycogen; partial depletion causes lithium sensitivity,…
	-0.752471152966305	CAGL0B01925g		Ortholog(s) have protein serine/threonine kinase activity, role in exocytosis, protein autophosphorylation and cytoplasmic side of plasma membrane localization				YDR122W	KIN1	serine/threonine protein kinase KIN1	Serine/threonine protein kinase involved in regulation of exocytosis; localizes to the cytoplasmic face of the plasma membrane; KIN1 has a paralog, KIN2, that arose from the whole genome duplication
	-0.892974668812717	CAGL0L06600g	NAS6	Regulatory, nonATPase subunit of the 26S proteasome	C3_04920C		Ortholog(s) have role in proteasome regulatory particle assembly, proteolysis and cytosol, nucleus, proteasome regulatory particle localization	YGR232W	NAS6		Evolutionarily conserved 19S regulatory particle assembly-chaperone; proteasome-interacting protein involved in the assembly of the base subcomplex of the 19S proteasomal regulatory particle (RP); ortholog of human oncoprotein gankyrin, also known as p28, which interacts with the Rb tumor suppressor and CDK4/6
	-0.900606702020858	CAGL0L00649g		Acetyl-coenzyme A synthetase	C2_10350C	ACS1	Acetyl-CoA synthetase; induced by human neutrophils; fluconazole-repressed; regulated by Nrg1/Mig1; colony morphology-related gene regulation by Ssn6; only in stationary phase cultures; rat catheter biofilm repressed, Spider biofilm induced	YAL054C	ACS1	acetate--CoA ligase 1|FUN44	Acetyl-coA synthetase isoform; along with Acs2p, acetyl-coA synthetase isoform is the nuclear source of acetyl-coA for histone acetylation; expressed during growth on nonfermentable carbon sources and under aerobic conditions
	-0.942363732169381	CAGL0C00275g	HSP31	Putative cysteine protease; protein differentially expressed in azole resistant strain; gene is upregulated in azole-resistant strain
	-1.09041470319196	CAGL0K05247g		Ortholog(s) have ubiquitin protein ligase binding activity, role in fungal-type cell wall organization, regulation of transcription from RNA polymerase II promoter and cytosol, nucleus localization				YPR030W	CSR2	ART8|MRG19	Nuclear ubiquitin protein ligase binding protein; may regulate utilization of nonfermentable carbon sources and endocytosis of plasma membrane proteins; overproduction suppresses chs5 spa2 lethality at high temp; ubiquitinated by Rsp5p, deubiquitinated by Ubp2p; CSR2 has a paralog, ECM21, that arose from the whole genome duplication
Ribosome Biogenesis	0.911962730688049	CAGL0B01397g	NOP8	Putative nucleolar protein required for ribosome biogenesis; gene is downregulated in azole-resistant strain	C6_04330W	NOP8	Ortholog of S. cereviiae Nop8; has a role in ribosomal large subunit biogenesis; rat catheter and Spider biofilm induced	YOL144W	NOP8		Nucleolar protein required for 60S ribosomal subunit biogenesis
	0.882224641360497	CAGL0I02376g		Has domain(s) with predicted role in ribosomal small subunit biogenesis and 90S preribosome localization
	0.823143080481143	CAGL0L05170g		Ortholog(s) have role in ribosomal large subunit biogenesis, ribosomal small subunit biogenesis and cytosolic large ribosomal subunit, nucleolus localization	C2_08180C		Ortholog(s) have role in ribosomal large subunit biogenesis, ribosomal small subunit biogenesis and cytosolic large ribosomal subunit, nucleolus localization	YKL082C	RRP14	ribosome biosynthesis protein RRP14	Essential protein, constituent of 66S pre-ribosomal particles; interacts with proteins involved in ribosomal biogenesis and cell polarity; member of the SURF-6 family
	0.770141943942999	CAGL0A04257g		Ortholog(s) have sequence-specific DNA binding activity, role in regulation of transcription from RNA polymerase II promoter and Rpd3L-Expanded complex, cytoplasm localization				YBL054W	TOD6	PBF1	PAC motif binding protein involved in rRNA and ribosome biogenesis; subunit of the RPD3L histone deacetylase complex; Myb-like HTH transcription factor; hypophosphorylated by rapamycin treatment in a Sch9p-dependent manner; activated in stochastic pulses of nuclear localization
	0.76079239494825	CAGL0C00759g		Ortholog(s) have transcription coactivator activity and role in chromatin silencing at telomere, positive regulation of ribosomal protein gene transcription from RNA polymerase II promoter				YLR223C	IFH1		Coactivator, regulates transcription of ribosomal protein (RP) genes; recruited to RP gene promoters during optimal growth conditions via Fhl1p; subunit of CURI, a complex that coordinates RP production and pre-rRNA processing; regulated by acetylation and phosphorylation at different growth states via TORC1 signaling; IFH1 has a paralog, CRF1, that arose from the whole genome duplication
	0.722199049984656	CAGL0L10890g		Ortholog(s) have role in cellular response to biotic stimulus, cellular response to starvation and chromosome organization, more	C1_09510W	YTM1	Protein similar to S. cerevisiae Ytm1p, which is involved in biogenesis of the large ribosomal subunit; transposon mutation affects filamentous growth; protein level decreases in stationary phase cultures; Hap43p-induced gene	YOR272W	YTM1	CST14	Constituent of 66S pre-ribosomal particles; forms a complex with Nop7p and Erb1p that is required for maturation of the large ribosomal subunit; has seven C-terminal WD repeats
	0.654948931417479	CAGL0M03751g		Ortholog(s) have polynucleotide adenylyltransferase activity, ribosomal large subunit binding activity				YNL299W	TRF5	non-canonical poly(A) polymerase TRF5	Non-canonical poly(A) polymerase; involved in nuclear RNA degradation as a component of the TRAMP complex; catalyzes polyadenylation of hypomodified tRNAs, and snoRNA and rRNA precursors; overlapping but non-redundant functions with Pap2p
	0.644480061484629	CAGL0D00220g		Ortholog(s) have role in ribosomal large subunit export from nucleus and nucleolus, preribosome, large subunit precursor localization	C4_04100C	ECM1	Putative pre-ribosomal factor; decreased mRNA abundance observed in cyr1 homozygous mutant hyphae; induced by heavy metal (cadmium) stress; Hog1p regulated	YAL059W	ECM1		Pre-ribosomal factor involved in 60S ribosomal protein subunit export; associates with the pre-60S particle; shuttles between the nucleus and cytoplasm
	0.642949649059574	CAGL0L05500g		Ortholog(s) have role in ribosomal large subunit biogenesis and cytoplasm, nucleus, ribosome localization	C7_00160C		Ortholog(s) have role in ribosomal large subunit biogenesis and cytoplasm, nucleus, ribosome localization	YJL122W	ALB1		Shuttling pre-60S factor; involved in the biogenesis of ribosomal large subunit; interacts directly with Arx1p; responsible for Tif6p recycling defects in absence of Rei1p
	0.630863992112973	CAGL0H02189g		Ortholog(s) have role in ribosomal small subunit biogenesis and nucleolus, ribosome localization	CR_01710W		Putative nucleolar protein; implicated in ribosome biogenesis; rat catheter biofilm repressed	YMR269W	TMA23	YMR268W-A	Nucleolar protein implicated in ribosome biogenesis; deletion extends chronological lifespan
	0.599641807043465	CAGL0K09042g		Ortholog(s) have nucleus, ribosome localization	C1_09330W		Putative ribosome-associated protein; ortholog of S. cerevisiae Tma16; Hap43-induced gene; Spider biofilm induced	YOR252W	TMA16	RBF17	Protein of unknown function that associates with ribosomes
	0.592287895126517	CAGL0F00473g		Ortholog(s) have role in ribosomal large subunit biogenesis, translational initiation and cytoplasm, nucleus localization	C7_00800C	YAE1	Ortholog(s) have role in ribosomal large subunit biogenesis, translational initiation and cytoplasm, nucleus localization	YJR067C	YAE1		Protein that forms a complex with Lto1p and Rli1p; essential for growth under standard (aerobic) conditions but not under anaerobic conditions; may have a role in protection of ribosomal assembly and function from damage due to reactive oxygen species
	0.590895529785423	CAGL0C03369g		Ortholog(s) have role in ribosomal large subunit export from nucleus and mitotic spindle, mitotic spindle pole body, nucleolus, nucleoplasm, preribosome, large subunit precursor localization	C6_03640W	NOG2	Putative nucleolar GTPase; repressed by prostaglandins; Hap43-induced, rat catheter and Spider biofilm induced	YNR053C	NOG2	putative GTPase NOG2|NUG2	Putative GTPase; associates with pre-60S ribosomal subunits in the nucleolus and is required for their nuclear export and maturation; recruited by ribosomal proteins L17, L35, and L37 to assembling ribosomes after 27SB pre-rRNA is generated, immediately preceding removal of ITS2
	0.59051557149907	CAGL0K07700g		Ortholog(s) have role in RNA Polymerase I assembly, RNA Polymerase II core complex assembly, RNA Polymerase III assembly, formation of translation preinitiation complex and cytoplasm, cytosolic ribosome localization	C5_02010C		Ortholog(s) have role in RNA Polymerase I assembly, RNA Polymerase II core complex assembly, RNA Polymerase III assembly, formation of translation preinitiation complex and cytoplasm, cytosolic ribosome localization	YFL023W	BUD27	URI1	Unconventional prefoldin protein involved in translation initiation; required for correct assembly of RNAP I, II, and III in an Rpb5p-dependent manner; shuttles between nucleus and cytoplasm; mutants have inappropriate expression of nutrient sensitive genes due to translational derepression of Gcn4p transcription factor; diploid mutants show random budding; ortholog of human URI/RMP
	0.579413580055506	CAGL0F05687g		Ortholog(s) have cytoplasm, ribosome localization				YDR186C	YDR186C		Protein involved in SRP-independent targeting of substrates to the ER; component of an alternative ER targeting pathway that has partial functional redundancy with the GET pathway; preference for substrates with downstream transmembrane domains; interacts with Env10p/Snd2p and Pho88p/Snd3p; can compensate for loss of SRP; may interact with ribosomes, based on co-purification experiments; GFP-fusi…
	0.556511137665028	CAGL0J03476g		Ortholog(s) have role in cellular response to drug, ribosomal large subunit assembly and nucleolus, ribosome localization	C4_05010W		Protein with a predicted role in ribosome biogenesis; mutation confers hypersensitivity to 5-fluorocytosine (5-FC), 5-fluorouracil (5-FU); repressed in core stress response; repressed by prostaglandins; Hap43-induced	YCR072C	RSA4		WD-repeat protein involved in ribosome biogenesis; may interact with ribosomes; required for maturation and efficient intra-nuclear transport or pre-60S ribosomal subunits, localizes to the nucleolus
	0.55636794608405	CAGL0I06490g		Ortholog(s) have role in ribosomal large subunit biogenesis and nucleolus localization	C1_08870C	JIP5	Ortholog of S. cerevisiae Jip5; predicted role in biogenesis of the large ribosomal subunit; repressed in core stress response; Hap43-induced gene	YPR169W	JIP5		Protein required for biogenesis of the large ribosomal subunit; required for biogenesis of the large ribosomal subunit; interacts with proteins involved in RNA processing, ribosome biogenesis, ubiquitination and demethylation; similar to WDR55, a human WD repeat protein; essential gene
	0.547397950466738	CAGL0K03861g		Ortholog(s) have unfolded protein binding activity, role in ribosome biogenesis and cytosol, nucleolus localization	C1_12680W		Ortholog(s) have unfolded protein binding activity, role in ribosome biogenesis and cytosol, nucleolus localization	YMR131C	RRB1	ribosome biosynthesis protein RRB1	Specific chaperone for ribosomal protein Rpl3p; binds to nascent Rpl3p during translation; essential gene
	0.544492008797092	CAGL0G00924g	GLM5	Gene used for molecular typing of C. glabrata strain isolates	CR_03650W	SGD1	Predicted small ribosomal subunit biogenesis protein; repressed in core stress response; transcript increases in populations of cells exposed to fluconazole over multiple generations; Spider biofilm induced	YLR336C	SGD1		Essential nuclear protein; required for biogenesis of the small ribosomal subunit; has a possible role in the osmoregulatory glycerol response; putative homolog of human NOM1 which is implicated in acute myeloid leukemia
	0.539967899463882	CAGL0J00957g		Ortholog(s) have ATPase activator activity, role in assembly of large subunit precursor of preribosome, cellular response to drug, ribosomal large subunit biogenesis and nucleolus, preribosome, large subunit precursor localization	C4_00510C	RLP24	Putative ribosomal protein; Hap43-induced; essential gene; heterozygous mutation confers hypersensitivity to 5-fluorocytosine (5-FC), 5-fluorouracil (5-FU), and tubercidin (7-deazaadenosine); Spider biofilm induced	YLR009W	RLP24	ATPase-activating ribosome biosynthesis protein	Essential protein required for ribosomal large subunit biogenesis; associated with pre-60S ribosomal subunits; stimulates the ATPase activity of Afg2p, which is required for release of Rlp24p from the pre-60S particle; has similarity to Rpl24Ap and Rpl24Bp
	0.535181908643439	CAGL0F04103g		Ortholog(s) have nucleolus, preribosome, large subunit precursor, ribosome localization	C3_04510W		Protein of unknown function; Hap43-induced; F-12/CO2 early biofilm induced	YBL028C	YBL028C		Protein of unknown function that may interact with ribosomes; green fluorescent protein (GFP)-fusion protein localizes to the nucleolus; predicted to be involved in ribosome biogenesis
	0.520342612618146	CAGL0I09350g		Ortholog(s) have sequence-specific DNA binding activity and role in budding cell bud growth, mitotic cell cycle, nucleocytoplasmic transport, ribosomal large subunit biogenesis	C1_05060W	REI1	Putative cytoplasmic pre-60S factor; Hap43-induced; repressed by prostaglandins	YBR267W	REI1		Cytoplasmic pre-60S factor; required for the correct recycling of shuttling factors Alb1, Arx1 and Tif6 at the end of the ribosomal large subunit biogenesis; involved in bud growth in the mitotic signaling network
	0.516345335692191	CAGL0F07403g		Ortholog(s) have role in ribosomal large subunit biogenesis and nucleolus, preribosome, large subunit precursor localization	C2_07960C	NSA1	Putative 66S pre-ribosomal particles conmponent; Hap43-induced; repressed by prostaglandins	YGL111W	NSA1	ribosome biosynthesis protein NSA1	Constituent of 66S pre-ribosomal particles; involved in 60S ribosomal subunit biogenesis
	0.513679583070827	CAGL0I02398g		Ortholog(s) have ribosomal large subunit binding activity, role in ribosomal large subunit export from nucleus and cytosol, cytosolic large ribosomal subunit, nucleus, preribosome, large subunit precursor localization	CR_06720W	NMD3	Putative nonsense-mediated mRNA decay protein; repressed in core stress response; repressed by prostaglandins	YHR170W	NMD3	ribosome-binding protein NMD3|SRC5	Protein involved in nuclear export of the large ribosomal subunit; acts as a Crm1p-dependent adapter protein for export of nascent ribosomal subunits through the nuclear pore complex
	0.508068538107023	CAGL0D02838g		Ortholog(s) have role in hyphal growth, ribosomal large subunit biogenesis, ribosomal large subunit export from nucleus, single-species biofilm formation on inanimate substrate	C5_02120C	RIX7	Putative ATPase of the AAA family; role in ribosomal subunit export from the nucleus; mutation impairs hyphal growth and biofilm formation	YLL034C	RIX7	putative AAA family ATPase RIX7	Putative ATPase of the AAA family; required for export of pre-ribosomal large subunits from the nucleus; distributed between the nucleolus, nucleoplasm, and nuclear periphery depending on growth conditions
	-0.538367257348475	CAGL0K04719g		Ortholog(s) have mitochondrion, ribosome localization	C3_05710W	RCT1	Fluconazole-induced protein; Ras1, Cyr1 repressed and Efg1 induced; regulated by Nrg1, Tup1, Tbf1, Ssn6; induced in oralpharyngeal candidasis; rat catheter biofilm repressed	YNL208W	YNL208W		Protein of unknown function; may interact with ribosomes, based on co-purification experiments; authentic, non-tagged protein is detected in purified mitochondria in high-throughput studies; potential orthologs found in other fungi
	-0.677646695743103	CAGL0K03575g		Ortholog(s) have cytoplasm, nucleus, ribosome localization	C1_03270W		Putative protein of unknown function; Hap43-repressed gene; Spider biofilm induced	YMR114C	YMR114C	putative peptide hydrolase	Protein of unknown function; may interact with ribosomes, based on co-purification experiments; green fluorescent protein (GFP)-fusion protein localizes to the nucleus and cytoplasm; YMR114C is not an essential gene
Intracellular Traffic	0.832250144519084	CAGL0M06149g		Ortholog(s) have role in ER to Golgi vesicle-mediated transport and P-body, cytosol, endoplasmic reticulum membrane, extrinsic component of membrane localization	C4_06680C		Ortholog(s) have role in ER to Golgi vesicle-mediated transport and P-body, cytosol, endoplasmic reticulum membrane, extrinsic component of membrane localization	YBR172C	SMY2		GYF domain protein; involved in COPII vesicle formation; interacts with the Sec23p/Sec24p subcomplex; overexpression suppresses the temperature sensitivity of a myo2 mutant; similar to S. pombe Mpd2; SMY2 has a paralog, SYH1, that arose from the whole genome duplication
	0.581922349853946	CAGL0L04928g		Ortholog(s) have nucleocytoplasmic transporter activity, structural constituent of nuclear pore activity				YKL068W	NUP100	FG-nucleoporin NUP100|[NUP100+]|NSP100	FG-nucleoporin component of central core of the nuclear pore complex; contributes directly to nucleocytoplasmic transport and maintenance of the nuclear pore complex (NPC) permeability barrier and is involved in gene tethering at the nuclear periphery; NUP100 has a paralog, NUP116, that arose from the whole genome duplication
	-0.510791404314734	CAGL0G06424g		Ortholog(s) have phosphatidylinositol-3-phosphate binding activity, role in late endosome to Golgi transport, protein localization and cytosol, endosome, fungal-type vacuole membrane, nucleus localization	C1_08340C		Sorting nexin; role in maintaining late-Golgi resident enzymes in their proper location by recycling molecules from the prevacuolar compartment; Spider biofilm induced	YOR357C	SNX3	GRD19	Sorting nexin for late-Golgi enzymes; required to maintain late-Golgi resident enzymes in their proper location by recycling molecules from the prevacuolar compartment; contains a PX domain and sequence similarity to human Snx3p
	-0.572931059083335	CAGL0L13200g		Ortholog(s) have SNAP receptor activity and role in ER to Golgi vesicle-mediated transport, vesicle fusion with Golgi apparatus	C1_02510W		Putative v-SNARE of the endoplasmic reticulum membrane; possibly an essential gene, disruptants not obtained by UAU1 method	YLR078C	BOS1	SEC32	v-SNARE (vesicle specific SNAP receptor); localized to the endoplasmic reticulum membrane and necessary for vesicular transport from the ER to the Golgi; required for efficient nuclear fusion during mating
	-0.592845847113801	CAGL0M10235g		Ortholog(s) have SNAP receptor activity, role in intra-Golgi vesicle-mediated transport, vesicle fusion and Golgi trans cisterna, SNARE complex localization	CR_01190C	SFT1	Putative Golgi v-SNARE; Plc1-regulated; Spider biofilm induced	YKL006C-A	SFT1		Intra-Golgi v-SNARE; required for transport of proteins between an early and a later Golgi compartment
	-0.687921647162768	CAGL0L06292g		Ortholog(s) have role in vesicle-mediated transport and COPI-coated vesicle, integral component of Golgi membrane localization	C4_07240W		Ortholog(s) have role in vesicle-mediated transport and COPI-coated vesicle, integral component of Golgi membrane localization	YDR100W	TVP15		Integral membrane protein; localized to late Golgi vesicles along with the v-SNARE Tlg2p
	-1.13507947249272	CAGL0L13244g		Ortholog(s) have glycoprotein binding activity, role in ER to Golgi vesicle-mediated transport and ER to Golgi transport vesicle, Golgi membrane, endoplasmic reticulum localization	CR_07180W	EMP46	Protein similar to S. cerevisiae Emp46, an integral membrane component of ER-derived COPII-coated vesicles; functions in ER to Golgi transport; induced by alpha pheromone in SpiderM medium	YLR080W	EMP46		Integral membrane component of ER-derived COPII-coated vesicles; functions in ER to Golgi transport; EMP46 has a paralog, EMP47, that arose from the whole genome duplication
Pheromone Response	0.996292603649028	CAGL0G04433g		Ortholog(s) have endoplasmic reticulum localization	C7_01940C		Pheromone-regulated protein (Prm10) of S. cerevisiae; colony morphology-related gene regulation by Ssn6; induced by Mnl1 under weak acid stress; possibly essential gene, disruptants not obtained by UAU1 method; Spider biofilm induced	YJL108C	PRM10	pheromone-regulated protein PRM10	Pheromone-regulated protein; proposed to be involved in mating; predicted to have 5 transmembrane segments; induced by treatment with 8-methoxypsoralen and UVA irradiation
	-0.652950627512818	CAGL0M08184g	STE3	Putative a-factor pheromone receptor	C1_05620C	STE3	Protein similar to S. cerevisiae Ste3p, the receptor for a-factor mating pheromone; alpha mating-type-specific transcription	YKL178C	STE3	DAF2	Receptor for a factor pheromone; couples to MAP kinase cascade to mediate pheromone response; transcribed in alpha cells and required for mating by alpha cells, ligand bound receptors endocytosed and recycled to the plasma membrane; GPCR
Autophagy	-0.559248315941163	CAGL0L06006g		Ortholog(s) have protein serine/threonine kinase activity	C4_04450C	ATG1	Putative protein serine/threonine kinase; predicted role in vesicle formation in autophagy and the cytoplasm-to-vacuole targeting (Cvt) pathway; Spider biofilm induced	YGL180W	ATG1	serine/threonine protein kinase ATG1|APG1|CVT10|AUT3	Protein serine/threonine kinase; required for vesicle formation in autophagy and the cytoplasm-to-vacuole targeting (Cvt) pathway; structurally required for phagophore assembly site formation; during autophagy forms a complex with Atg13p and Atg17p; essential for cell cycle progression from G2/M to G1 under nitrogen starvation
	-0.612363685453385	CAGL0B02860g		Ortholog(s) have role in macroautophagy, mitophagy and mitochondrion localization				YLR356W	ATG33		Mitochondrial mitophagy-specific protein; required primarily for mitophagy induced at post-log phase; not required for other types of selective autophagy or macroautophagy; conserved within fungi, but not in higher eukaryotes; ATG33 has a paralog, SCM4, that arose from the whole genome duplication
	-0.854123998617714	CAGL0A04675g		Ortholog(s) have protein tag activity	C1_05700W	AUT7	Putative autophagosome protein; macrophage/pseudohyphal-repressed; alternatively spliced intron in 5' UTR; Spider biofilm induced	YBL078C	ATG8	ubiquitin-like protein ATG8|AUT7|CVT5|APG8	Component of autophagosomes and Cvt vesicles; regulator of Atg1p, targets it to autophagosomes; binds the Atg1p-Atg13p complex, triggering its vacuolar degradation; unique ubiquitin-like protein whose conjugation target is lipid phosphatidylethanolamine (PE); Atg8p-PE is anchored to membranes, is involved in phagophore expansion, and may mediate membrane fusion during autophagosome formation; dec…
	-0.970492328926712	CAGL0M01848g		Ortholog(s) have role in lysosomal microautophagy, signal transduction and EGO complex, fungal-type vacuole membrane, late endosome membrane localization				YBR077C	SLM4	GSE1|NIR1|EGO3	Component of the EGO and GSE complexes; essential for integrity and function of EGO; EGO is involved in the regulation of microautophagy and GSE is required for proper sorting of amino acid permease Gap1p; gene exhibits synthetic genetic interaction with MSS4
Nucleic Acid Processing	0.911193448747316	CAGL0B00792g		Ortholog(s) have mRNA binding activity, role in cytoplasmic translation and cytoplasmic stress granule, polysome localization				YCL037C	SRO9		Cytoplasmic RNA-binding protein; shuttles between nucleus and cytoplasm and is exported from the nucleus in an mRNA export-dependent manner; associates with translating ribosomes; involved in heme regulation of Hap1p as a component of the HMC complex, also involved in the organization of actin filaments; contains a La motif; SRO9 has a paralog, SLF1, that arose from the whole genome duplication
	0.892372970720142	CAGL0D04180g		Ortholog(s) have U3 snoRNA binding, rRNA binding activity, role in maturation of SSU-rRNA from tricistronic rRNA transcript (SSU-rRNA, 5.8S rRNA, LSU-rRNA) and nucleolus, small-subunit processome localization	CR_06840W		Ortholog(s) have U3 snoRNA binding, rRNA binding activity, role in maturation of SSU-rRNA from tricistronic rRNA transcript (SSU-rRNA, 5.8S rRNA, LSU-rRNA) and nucleolus, small-subunit processome localization	YIL091C	UTP25	rRNA-binding ribosome biosynthesis protein UTP25	Nucleolar protein; required for 35S pre-RNA processing and 40S ribosomal subunit biogenesis
	0.889848010954609	CAGL0I03344g		Ortholog(s) have cytoplasmic stress granule, nucleolus localization	C1_08000W	NRP1	Ortholog(s) have cytoplasmic stress granule, nucleolus localization	YDL167C	NRP1		Putative RNA binding protein of unknown function; localizes to stress granules induced by glucose deprivation; predicted to be involved in ribosome biogenesis
	0.884054991110725	CAGL0K09922g		Ortholog(s) have RNA binding, flap-structured DNA binding activity, role in nuclear-transcribed mRNA poly(A) tail shortening, positive regulation of endodeoxyribonuclease activity and P-body, cytosol, nucleus localization	C1_02850W		Ortholog(s) have RNA binding, flap-structured DNA binding activity, role in nuclear-transcribed mRNA poly(A) tail shortening, positive regulation of endodeoxyribonuclease activity and P-body, cytosol, nucleus localization	YOR359W	VTS1		Flap-structured DNA-binding and RNA-binding protein; stimulates deadenylation-dependent mRNA degradation mediated by the CCR4-NOT deadenylase complex; member of the Smaug (Smg) family of post-transcriptional regulators which bind RNA through a conserved sterile alpha motif (SAM) domain that interacts with Smg recognition element (SREs) containing transcripts; stimulates Dna2p endonuclease activity
	0.87671684499033	CAGL0A03674g		Ortholog(s) have rRNA (adenine) methyltransferase activity and nucleolus localization	C2_05080C		Predicted nucleolar S-adenosylmethionine-dependent rRNA methyltransferase; Spider biofilm induced	YBR141C	BMT2	25S rRNA (adenine2142-N1)-methyltransferase	Nucleolar S-adenosylmethionine-dependent rRNA methyltransferase; methylates adenine (m1A) of the large subunit (LSU) rRNA at position 2142; belongs to Rossmann fold superfamily; green fluorescent protein (GFP)-fusion protein localizes to the nucleolus; YBR141C is not an essential gene
	0.861902385009582	CAGL0L12386g	SUV3	ATP-dependent RNA helicase with a role in maturation of cytochrome c oxidase subunit transcripts	C2_04350C	SUV3	RNA helicase; mitochondrial RNA catabolism; required for chlamydospore formation, embedded hyphal growth, wild-type respiratory growth, alkaline-induced morphogenesis and SD or Spider biofilm formation; rat catheter biofilm induced	YPL029W	SUV3	ATP-dependent RNA helicase SUV3|LPB2	ATP-dependent RNA helicase; component of the mitochondrial degradosome along with the RNase Dss1p; the degradosome associates with the ribosome and mediates RNA turnover; also required during splicing of the COX1 AI5_beta intron; expression of a processed form of human homolog SUPV3L1 carrying an N-terminal deletion of 46 amino acids rescues yeast suv3 null mutant
	0.859727189646677	CAGL0L04114g		Ortholog(s) have RNA binding activity, role in box H/ACA snoRNP assembly and nucleoplasm localization	CR_04110W		Putative RNA-binding protein; role in assembly of box H/ACA snoRNPs and thus pre-rRNA processing; Spider biofilm induced	YNL124W	NAF1	RNA-binding snoRNP assembly protein	RNA-binding protein required for the assembly of box H/ACA snoRNPs; thus required for pre-rRNA processing; forms a complex with Shq1p and interacts with H/ACA snoRNP components Nhp2p and Cbf5p; similar to Gar1p
	0.823294643796728	CAGL0A04213g		Ortholog(s) have mRNA binding activity	CR_01500W	PIN4	Protein with similarity to S. cerevisiae Pin4p; transposon mutation affects filamentous growth	YBL051C	PIN4	MDT1	Protein involved in G2/M phase progression and response to DNA damage; interacts with Rad53p; contains an RNA recognition motif, a nuclear localization signal, and several SQ/TQ cluster domains; hyperphosphorylated in response to DNA damage
	0.817764556103448	CAGL0L03047g		Ortholog(s) have role in maturation of LSU-rRNA from tricistronic rRNA transcript (SSU-rRNA, 5.8S rRNA, LSU-rRNA) and nucleolus localization	C7_01200C	DBP7	Putative ATP-dependent DEAD-box RNA helicase; Hap43-induced; rat catheter biofilm induced	YKR024C	DBP7	putative ATP-dependent RNA helicase	Putative ATP-dependent RNA helicase of the DEAD-box family; involved in ribosomal biogenesis; required at post-transcriptional step for efficient retrotransposition; essential for growth under anaerobic conditions
	0.81510773125187	CAGL0J01023g		Ortholog(s) have tRNA-specific adenosine deaminase activity, role in tRNA modification and cytoplasm, nucleus localization	C2_01510C		Ortholog(s) have tRNA-specific adenosine deaminase activity, role in tRNA modification and cytoplasm, nucleus localization	YJL035C	TAD2	tRNA(adenine34) deaminase	Subunit of tRNA-specific adenosine-34 deaminase; forms a heterodimer with Tad3p that converts adenosine to inosine at the wobble position of several tRNAs
	0.808065195790252	CAGL0K02211g		Ortholog(s) have role in endonucleolytic cleavage in 5'-ETS of tricistronic rRNA transcript (SSU-rRNA, 5.8S rRNA and LSU-rRNA), more	C3_06370C		Ortholog(s) have role in endonucleolytic cleavage in 5'-ETS of tricistronic rRNA transcript (SSU-rRNA, 5.8S rRNA and LSU-rRNA), more	YER127W	LCP5		Essential protein involved in maturation of 18S rRNA; depletion leads to inhibited pre-rRNA processing and reduced polysome levels; localizes primarily to the nucleolus
	0.805251352434859	CAGL0M11638g		Ortholog(s) have 3'-5'-exoribonuclease activity and role in U5 snRNA 3'-end processing, exonucleolytic trimming to generate mature 3'-end of 5.8S rRNA from tricistronic rRNA transcript (SSU-rRNA, 5.8S rRNA, LSU-rRNA)	C1_13200C	REX3	Ortholog(s) have 3'-5'-exoribonuclease activity and role in U5 snRNA 3'-end processing, exonucleolytic trimming to generate mature 3'-end of 5.8S rRNA from tricistronic rRNA transcript (SSU-rRNA, 5.8S rRNA, LSU-rRNA)	YLR107W	REX3	RNA exonuclease	RNA exonuclease; required for maturation of the RNA component of RNase MRP; functions redundantly with Rnh70p and Rex2p in processing of U5 snRNA and RNase P RNA; member of RNase D family of exonucleases
	0.792605160343436	CAGL0E01925g		Ortholog(s) have tRNA (guanine-N2-)-methyltransferase activity, role in tRNA methylation and cytosol, nucleus, tRNA (m2G10) methyltransferase complex localization	C3_05140C		Ortholog(s) have tRNA (guanine-N2-)-methyltransferase activity, role in tRNA methylation and cytosol, nucleus, tRNA (m2G10) methyltransferase complex localization	YOL124C	TRM11	tRNA (guanine-N2-)-methyltransferase	Catalytic subunit of adoMet-dependent tRNA methyltransferase complex; required for the methylation of the guanosine nucleotide at position 10 (m2G10) in tRNAs; contains a THUMP domain and a methyltransferase domain; another complex member is Trm112p
	0.790887370264987	CAGL0M03487g		Ortholog(s) have RNA polymerase III activity, role in tRNA transcription from RNA polymerase III promoter and DNA-directed RNA polymerase III complex, cytosol, mitochondrion localization	C6_03210C		RNA polymerase III subunit; Spider biofilm induced	YNR003C	RPC34	DNA-directed RNA polymerase III subunit C34|C34	RNA polymerase III subunit C34; interacts with TFIIIB70 and is a key determinant in pol III recruitment by the preinitiation complex
	0.782798171342957	CAGL0J01045g		Ortholog(s) have ATP-dependent RNA helicase activity, role in rRNA processing and cytosol, nucleus, small-subunit processome localization	C4_02830C	HCA4	Putative role in regulation of cell wall biogenesis; Hap43p-induced gene; possibly an essential gene, disruptants not obtained by UAU1 method; flow model and rat catheter biofilm induced	YJL033W	HCA4	RNA-dependent ATPase HCA4|ECM24|DBP4	DEAD box RNA helicase; component of the SSU; interacts with Bfr2p and Enp2p; high-copy number suppression of a U14 snoRNA processing mutant suggests an involvement in 18S rRNA synthesis
	0.777674693129331	CAGL0K01573g		Ortholog(s) have RNA binding activity, role in mRNA 5'-splice site recognition and U2-type prespliceosome localization	C5_01930W		Ortholog(s) have RNA binding activity, role in mRNA 5'-splice site recognition and U2-type prespliceosome localization	YDL030W	PRP9	SF3a splicing factor complex subunit PRP9	Subunit of the SF3a splicing factor complex; required for spliceosome assembly; acts after the formation of the U1 snRNP-pre-mRNA complex
	0.761994604660276	CAGL0M05159g		Ortholog(s) have RNA stem-loop binding, RNA-directed 5'-3' RNA polymerase activity, double-stranded RNA binding, ribonuclease III activity	C4_04830W	DCR1	Putative Dicer RNAse involved in RNA interference, similar to S. cerevisiae Rnt1p but orthologous to S. castellii Dcr1p, which is not conserved in S. cerevisiae	YMR239C	RNT1	ribonuclease III	Nuclear dsRNA-specific ribonuclease (RNase III); involved in rDNA transcription, rRNA processing and U2 snRNA 3' end formation by cleavage of a stem-loop structure at the 3' end of U2 snRNA; involved in polyadenylation-independent transcription termination; involved in the cell wall stress response, regulating the degradation of cell wall integrity and morphogenesis checkpoint genes
	0.759523534694475	CAGL0I07931g		Ortholog(s) have role in rRNA processing, ribosomal large subunit assembly and nucleolus localization	C1_12440W		Putative RNA exonuclease; induced in a ssr1 null mutant	YOL080C	REX4	putative 3'-5' exonuclease	Putative RNA exonuclease; possibly involved in pre-rRNA processing and ribosome assembly
	0.756834379965137	CAGL0J09460g		Ortholog(s) have polynucleotide adenylyltransferase activity				YIL079C	AIR1	TRAMP complex RNA-binding subunit	Zinc knuckle protein; involved in nuclear RNA processing and degradation as a component of the TRAMP complex; stimulates the poly(A) polymerase activity of Pap2p in vitro; AIR1 has a paralog, AIR2, that arose from the whole genome duplication; although Air1p and Air2p are homologous TRAMP subunits, they have nonredundant roles in regulation of substrate specificity of the exosome
	0.740323509640663	CAGL0F08217g		Ortholog(s) have mRNA binding activity and cytoplasmic stress granule localization				YGR250C	YGR250C		Putative RNA binding protein; localizes to stress granules induced by glucose deprivation; interacts with Rbg1p in a two-hybrid assay; protein abundance increases in response to DNA replication stress
	0.7389587947624	CAGL0E02343g		Ortholog(s) have endoribonuclease activity, enzyme activator activity	C2_07450C	RCL1	Putative U3-containing 90S preribosome processome complex subunit; Hap43-induced; essential; S. cerevisiae ortholog is essential; represses in core stress response;	YOL010W	RCL1	rRNA-processing endoribonuclease	Endonuclease that cleaves pre-rRNA at site A2 for 18S rRNA biogenesis; subunit of U3-containing 90S preribosome processome complex involved in small ribosomal subunit assembly; stimulates Bms1p GTPase and U3 binding activity; similar to RNA cyclase-like proteins but no cyclase activity detected
	0.738063417012142	CAGL0H01419g		Ortholog(s) have role in maturation of SSU-rRNA from tricistronic rRNA transcript (SSU-rRNA, 5.8S rRNA, LSU-rRNA) and 90S preribosome, nucleolus, small-subunit processome localization	CR_10470C		Ortholog(s) have role in maturation of SSU-rRNA from tricistronic rRNA transcript (SSU-rRNA, 5.8S rRNA, LSU-rRNA) and 90S preribosome, nucleolus, small-subunit processome localization	YDR299W	BFR2	rRNA-processing protein BFR2	Component of the SSU and 90S preribosomes; involved in pre-18S rRNA processing; binds to U3 snoRNA and Mpp10p; multicopy suppressor of sensitivity to Brefeldin A; expression is induced during lag phase and also by cold shock
	0.73581321307764	CAGL0J00913g		Ortholog(s) have SUMO transferase activity, role in postreplication repair and Smc5-Smc6 complex, nucleus localization				YLR007W	NSE1	Smc5-Smc6 complex subunit NSE1	Component of the SMC5-SMC6 complex; this complex plays a key role in the removal of X-shaped DNA structures that arise between sister chromatids during DNA replication and repair
	0.73517666546412	CAGL0C03355g		Ortholog(s) have ATPase activator activity, RNA binding activity	C5_02070C		Ortholog(s) have ATPase activator activity, RNA binding activity	YNR054C	ESF2	RNA-binding ATPase activator ESF2|ABT1	Essential nucleolar protein involved in pre-18S rRNA processing; binds to RNA and stimulates ATPase activity of Dbp8; involved in assembly of the small subunit (SSU) processome
	0.735014903649633	CAGL0I02354g		Ortholog(s) have ATP-dependent RNA helicase activity	CR_05630W	DBP8	Protein similar to S. cerevisiae Dbp8p, an ATP-dependent helicase involved in rRNA processing; oxidative stress-repressed via Cap1p; flucytosine repressed; likely to be essential for growth, based on insertional mutagenesis	YHR169W	DBP8	ATP-dependent RNA helicase DBP8	ATPase, putative RNA helicase of the DEAD-box family; component of 90S preribosome complex involved in production of 18S rRNA and assembly of 40S small ribosomal subunit; ATPase activity stimulated by association with Esf2p
	0.726322756616278	CAGL0G02783g		Ortholog(s) have unfolded protein binding activity, role in box H/ACA snoRNP assembly and cytosol, nucleoplasm localization	C2_05830C		Putative chaperone protein; role in the assembly of box H/ACA snoRNPs and thus for pre-rRNA processing; Spider biofilm induced	YIL104C	SHQ1	Hsp90 cochaperone SHQ1	Chaperone protein; required for the assembly of box H/ACA snoRNPs and thus for pre-rRNA processing; functions as an RNA mimic; forms a complex with Naf1p and interacts with H/ACA snoRNP components Nhp2p and Cbf5p; homology with known Hsp90p cochaperones; relocalizes to the cytosol in response to hypoxia
	0.72466901512378	CAGL0K06215g		Ortholog(s) have snoRNA binding activity	C1_10880W		Putative U3 snoRNA-associated protein; Hap43-induced; transposon mutation affects filamentous growth; repressed by prostaglandins	YDR449C	UTP6	snoRNA-binding rRNA-processing protein UTP6	Nucleolar protein; component of the small subunit (SSU) processome containing the U3 snoRNA that is involved in processing of pre-18S rRNA
	0.724080131326173	CAGL0F01925g		Ortholog(s) have role in endonucleolytic cleavage in 5'-ETS of tricistronic rRNA transcript (SSU-rRNA, 5.8S rRNA and LSU-rRNA), more	C3_07800C		Putative 35S rRNA processing protein; Hap43-induced; repressed by prostaglandins; Spider biofilm induced	YLR051C	FCF2		Nucleolar protein involved in the early steps of 35S rRNA processing; interacts with Faf1p; member of a transcriptionally co-regulated set of genes called the RRB regulon; essential gene
	0.72229955250624	CAGL0M07227g		Ortholog(s) have snoRNA binding activity and role in maturation of SSU-rRNA from tricistronic rRNA transcript (SSU-rRNA, 5.8S rRNA, LSU-rRNA), positive regulation of transcription from RNA polymerase I promoter	C3_07750W	UTP9	Small-subunit processome protein; Ssr1-induced; repressed by prostaglandins; physically interacts with TAP-tagged Nop1	YHR196W	UTP9		Nucleolar protein; component of the small subunit (SSU) processome containing the U3 snoRNA that is involved in processing of pre-18S rRNA
	0.715636124900555	CAGL0J03344g		Ortholog(s) have role in endonucleolytic cleavage in 5'-ETS of tricistronic rRNA transcript (SSU-rRNA, 5.8S rRNA and LSU-rRNA), more	C1_09710C		Ortholog(s) have role in endonucleolytic cleavage in 5'-ETS of tricistronic rRNA transcript (SSU-rRNA, 5.8S rRNA and LSU-rRNA), more	YER082C	UTP7	KRE31	Nucleolar protein; component of the small subunit (SSU) processome containing the U3 snoRNA that is involved in processing of pre-18S rRNA
	0.704339054434038	CAGL0L03916g		Has domain(s) with predicted nucleic acid binding activity
	0.703981524055362	CAGL0H02937g		Ortholog(s) have role in endonucleolytic cleavage in 5'-ETS of tricistronic rRNA transcript (SSU-rRNA, 5.8S rRNA and LSU-rRNA), more	C7_04190C	UTP18	Putative U3 snoRNA-associated protein; Hap43-induced; repressed in core stress response; physically interacts with TAP-tagged Nop1	YJL069C	UTP18		Small-subunit processome protein involved in pre-18S rRNA maturation; part of a subunit of the 90S preribosomal particle capable of interacting directly with the 5' ETS of the 35S pre-rRNA; contains WD40 repeats
	0.701663392730602	CAGL0B01771g		Ortholog(s) have rDNA spacer replication fork barrier binding activity				YDR110W	FOB1	replication fork barrier binding protein FOB1|HRM1	Nucleolar protein that binds the rDNA replication fork barrier site; required for replication fork blocking, recombinational hotspot activity, condensin recruitment to replication fork barrier (RFB), and rDNA repeat segregation; related to retroviral integrases
	0.695833067533372	CAGL0L11176g		Ortholog(s) have oxidized purine nucleobase lesion DNA N-glycosylase activity and role in base-excision repair, AP site formation, error-free translesion synthesis, telomere maintenance via telomerase	C7_03910W	OGG1	Mitochondrial glycosylase/lyase; repairs oxidative damage to mitochondrial DNA, contributes to UVA resistance, role in base-excision repair; Spider biofilm induced	YML060W	OGG1	8-oxoguanine glycosylase OGG1	Nuclear and mitochondrial glycosylase/lyase; specifically excises 7,8-dihydro-8-oxoguanine residues located opposite cytosine or thymine residues in DNA, repairs oxidative damage to mitochondrial DNA, contributes to UVA resistance
	0.6923441011487	CAGL0G08866g		Ortholog(s) have DNA replication origin binding, RNA polymerase II core promoter proximal region sequence-specific DNA binding, centromeric DNA binding and chromatin binding, more	C3_00670C	FKH2	Forkhead transcription factor; morphogenesis regulator; required for wild-type hyphal transcription, cell separation, and for virulence in cell culture; mutant lacks true hyphae, is constitutively pseudohyphal; upregulated in RHE model	YIL131C	FKH1	forkhead family transcription factor FKH1	Forkhead family transcription factor; rate-limiting replication origin activator; evolutionarily conserved lifespan regulator; binds multiple chromosomal elements with distinct specificities, cell cycle dynamics; regulates transcription elongation, chromatin silencing at mating loci, expression of G2/M phase genes; facilitates clustering, activation of early-firing replication origins; binds HML …
	0.687684680294434	CAGL0D03410g		Ortholog(s) have RNA polymerase I CORE element sequence-specific DNA binding, TBP-class protein binding activity and role in transcription of nuclear large rRNA transcript from RNA polymerase I promoter	C2_02630W		Putative transcription factor component of the core factor (CF) rDNA transcription factor complex; Spider biofilm induced	YJL025W	RRN7		Component of the core factor (CF) rDNA transcription factor complex; CF is required for transcription of 35S rRNA genes by RNA polymerase I and is composed of Rrn6p, Rrn7p, and Rrn11p
	0.687180824462874	CAGL0F02541g		Ortholog(s) have role in cellular response to drug, maturation of SSU-rRNA from tricistronic rRNA transcript (SSU-rRNA, 5.8S rRNA, LSU-rRNA), positive regulation of transcription from RNA polymerase I promoter	CR_10240W	UTP5	Putative U3 snoRNA-associated protein; Hap43p-induced gene; mutation confers resistance to 5-fluorocytosine (5-FC), 5-fluorouracil (5-FU), and tubercidin (7-deazaadenosine); physically interacts with TAP-tagged Nop1p	YDR398W	UTP5		Subunit of U3-containing Small Subunit (SSU) processome complex; involved in production of 18S rRNA and assembly of small ribosomal subunit
	0.686557202103338	CAGL0J10890g		Ortholog(s) have rRNA binding activity, role in conjugation with cellular fusion, ribosomal large subunit assembly and nucleolus localization				YDR312W	SSF2	rRNA-binding ribosome biosynthesis protein	Protein required for ribosomal large subunit maturation; functionally redundant with Ssf1p; member of the Brix family; SSF2 has a paralog, SSF1, that arose from the whole genome duplication
	0.681604663796235	CAGL0M01430g		Ortholog(s) have role in maturation of SSU-rRNA from tricistronic rRNA transcript (SSU-rRNA, 5.8S rRNA, LSU-rRNA), positive regulation of transcription from RNA polymerase I promoter	C3_02130W	UTP4	Putative U3 snoRNA-associated protein; Hap43-induced; physically interacts with TAP-tagged Nop1; Spider biofilm induced	YDR324C	UTP4		Subunit of U3-containing 90S preribosome and SSU processome complexes; involved in production of 18S rRNA and assembly of small ribosomal subunit; member of t-Utp subcomplex involved with transcription of 35S rRNA transcript; Small Subunit processome is also known as SSU processome
	0.681157125655556	CAGL0E02673g		Ortholog(s) have small ribosomal subunit rRNA binding activity	CR_02420W		Ortholog(s) have small ribosomal subunit rRNA binding activity	YOR004W	UTP23	rRNA-binding ribosome biosynthesis protein UTP23	Component of the small subunit processome; involved in 40S ribosomal subunit biogenesis; interacts with snR30 and is required for dissociation of snR30 from large pre-ribosomal particles; has homology to PINc domain protein Fcf1p, although the PINc domain of Utp23p is not required for function; essential protein
	0.678650048171524	CAGL0I03608g		Ortholog(s) have role in cellular response to drug, endonucleolytic cleavage in 5'-ETS of tricistronic rRNA transcript (SSU-rRNA, 5.8S rRNA and LSU-rRNA), more	C4_02790C	SAS10	Putative U3-containing small subunit processome complex subunit; Hap43p-induced gene; mutation confers resistance to 5-fluorocytosine (5-FC); repressed upon high-level peroxide stress	YDL153C	SAS10	rRNA-processing protein SAS10|UTP3	Subunit of U3-containing Small Subunit (SSU) processome complex; involved in production of 18S rRNA and assembly of small ribosomal subunit; disrupts silencing when overproduced; mutant has increased aneuploidy tolerance; essential gene
	0.678533894727252	CAGL0F06435g		Ortholog(s) have tRNA-intron endonuclease activity, role in tRNA-type intron splice site recognition and cleavage and tRNA-intron endonuclease complex localization	C1_03900W	SEN15	Similar to delta subunit of tRNA splicing endonuclease; increased transcription is observed upon fluphenazine treatment	YMR059W	SEN15		Subunit of the tRNA splicing endonuclease; tRNA splicing endonuclease (Sen complex) is composed of Sen2p, Sen15p, Sen34p, and Sen54p; Sen complex also cleaves the CBP1 mRNA at the mitochondrial surface
	0.676315616755419	CAGL0G06248g		Ortholog(s) have role in maturation of 5.8S rRNA from tricistronic rRNA transcript (SSU-rRNA, 5.8S rRNA, LSU-rRNA), maturation of LSU-rRNA from tricistronic rRNA transcript (SSU-rRNA, 5.8S rRNA, LSU-rRNA)	C2_06360C	MAK16	Putative constituent of 66S pre-ribosomal particles; Hap43-induced; repressed by prostaglandins; Spider biofilm induced	YAL025C	MAK16	ribosome biosynthesis protein MAK16	Essential nuclear protein; constituent of 66S pre-ribosomal particles; required for maturation of 25S and 5.8S rRNAs; required for maintenance of M1 satellite double-stranded RNA of the L-A virus
	0.671947256811234	CAGL0M05885g		Ortholog(s) have endonuclease activity and role in cellular response to drug, cleavage in ITS2 between 5.8S rRNA and LSU-rRNA of tricistronic rRNA transcript (SSU-rRNA, 5.8S rRNA, LSU-rRNA)	C2_06000W	LAS1	Putative bud formation and morphogenesis protein; mutation confers hypersensitivity to 5-fluorocytosine (5-FC), 5-fluorouracil (5-FU); macrophage-induced; Spider biofilm induced	YKR063C	LAS1	rRNA-processing protein LAS1	Endonuclease involved in pre-rRNA processing at both ends of ITS2; functions with Grc3p in a conserved mechanism to modulate rRNA processing and ribosome biogenesis; may coordinate the action of the Rat1p-Rai1p exoRNAse; required for the G1/S cell cycle transition; human ortholog is Las1L; mutants require the SSD1-v allele for viability
	0.664999795209883	CAGL0E03069g		Ortholog(s) have role in cellular response to drug, maturation of SSU-rRNA from tricistronic rRNA transcript (SSU-rRNA, 5.8S rRNA, LSU-rRNA) and 90S preribosome, cytosol, nucleolus, small-subunit processome localization	C7_03540C	ENP2	Putative nucleolar protein; essential; heterozygous mutation confers resistance to 5-fluorocytosine (5-FC), 5-fluorouracil (5-FU), and tubercidin (7-deazaadenosine); Hap43-induced; Spider biofilm induced	YGR145W	ENP2	ribosome biosynthesis protein ENP2	Component of the SSU; required for pre-18S rRNA processing, biogenesis of the small ribosomal subunit; interacts with U3 snoRNA, Mpp10p and Bfr2p; contains WD repeats, and has homology to Spb1p
	0.664541008778918	CAGL0D06094g		Ortholog(s) have role in box C/D snoRNP assembly, maturation of LSU-rRNA from tricistronic rRNA transcript (SSU-rRNA, 5.8S rRNA, LSU-rRNA) and cytoplasm, nucleus localization	C4_02750W	HIT1	Ortholog of S. cerevisiae Hit1; protein of unknown function required for high temperature growth; flow model biofilm induced; Spider biofilm induced	YJR055W	HIT1		Protein involved in C/D snoRNP assembly; regulates abundance of Rsa1p; required for growth at high temperature; similar to human ZNHIT3
	0.661728379061405	CAGL0F03289g		Ortholog(s) have double-stranded DNA binding, double-stranded RNA binding, enzyme regulator activity	C1_07960W		Predicted nuclear exosome-associated nucleic acid binding protein; rat catheter and Spider biofilm induced	YHR081W	LRP1	RRP47|YC1D	Nuclear exosome-associated nucleic acid binding protein; involved in RNA processing, surveillance, degradation, tethering, and export; forms a stable heterodimer with Rrp6p and regulates its exonucleolytic activity; rapidly degraded by the proteasome in the absence of Rrp6p; homolog of mammalian nuclear matrix protein C1D involved in regulation of DNA repair and recombination
	0.660570468706099	CAGL0I03630g		Ortholog(s) have RNA polymerase III activity, role in tRNA transcription from RNA polymerase III promoter and DNA-directed RNA polymerase III complex, cytosol localization	C4_02800W	RPC53	Ortholog(s) have RNA polymerase III activity, role in tRNA transcription from RNA polymerase III promoter and DNA-directed RNA polymerase III complex localization	YDL150W	RPC53	DNA-directed RNA polymerase III subunit C53|C53|RPC4	RNA polymerase III subunit C53
	0.655576777709164	CAGL0G00330g		Ortholog(s) have role in mRNA splicing, via spliceosome and U2-type catalytic step 1 spliceosome, U2-type spliceosomal complex localization	C2_10100W	CWC22	Predicted spliceosome-associated protein; role in pre-mRNA splicing; Spider biofilm induced	YGR278W	CWC22	U2-type spliceosomal complex subunit CWC22	Spliceosome-associated protein that is required for pre-mRNA splicing; necessary for Prp2p function at the first catalytic step of splicing; has similarity to S. pombe Cwf22p; CWC22 is an essential protein
	0.654740474348062	CAGL0J11286g		Ortholog(s) have chromatin binding activity	C1_06760C		Putative U2 snRNP component; mutation confers hypersensitivity to 5-fluorocytosine (5-FC), 5-fluorouracil (5-FU), and tubercidin (7-deazaadenosine); Hap43-induced, Spider biofilm induced	YNL182C	IPI3	chromatin-binding/pre-rRNA-processing protein IPI3	Component of the Rix1 complex and pre-replicative complexes (pre-RCs); required for processing of ITS2 sequences from 35S pre-rRNA; component of the pre-60S ribosomal particle with the dynein-related AAA-type ATPase Mdn1p; required for pre-RC formation and maintenance during DNA replication licensing; highly conserved protein which contains several WD40 motifs; IPI3 is an essential gene; other me…
	0.647552332847682	CAGL0J02376g		Ortholog(s) have role in maturation of SSU-rRNA from tricistronic rRNA transcript (SSU-rRNA, 5.8S rRNA, LSU-rRNA) and cytoplasm, nucleolus localization	C4_05650W		Ortholog(s) have role in maturation of SSU-rRNA from tricistronic rRNA transcript (SSU-rRNA, 5.8S rRNA, LSU-rRNA) and cytoplasm, nucleolus localization	YIL019W	FAF1		Protein required for pre-rRNA processing; also required for 40S ribosomal subunit assembly
	0.647326158985474	CAGL0D05874g		Ortholog(s) have role in endonucleolytic cleavage in 5'-ETS of tricistronic rRNA transcript (SSU-rRNA, 5.8S rRNA and LSU-rRNA), more	C2_00070C	MPP10	Putative SSU processome and 90S preribosome component; repressed in core stress response; repressed by prostaglandins	YJR002W	MPP10	rRNA-processing protein MPP10	Component of the SSU processome and 90S preribosome; required for pre-18S rRNA processing, interacts with and controls the stability of Imp3p and Imp4p, essential for viability; similar to human Mpp10p
	0.646789572046631	CAGL0M11110g		Ortholog(s) have role in rRNA processing and nucleolus, preribosome, large subunit precursor localization	C3_06760W		Ortholog(s) have role in rRNA processing and nucleolus, preribosome, large subunit precursor localization	YDR087C	RRP1		Essential evolutionarily conserved nucleolar protein; necessary for biogenesis of 60S ribosomal subunits and for processing of pre-rRNAs to mature rRNA; associated with several distinct 66S pre-ribosomal particles
	0.639464550291297	CAGL0F07557g		Ortholog(s) have first spliceosomal transesterification activity, role in generation of catalytic spliceosome for first transesterification step and U2-type catalytic step 1 spliceosome localization	C3_00100W		Ortholog(s) have first spliceosomal transesterification activity, role in generation of catalytic spliceosome for first transesterification step and U2-type catalytic step 1 spliceosome, mitotic spindle pole body localization	YKL095W	YJU2	mRNA splicing protein YJU2|CWC16	Essential protein required for pre-mRNA splicing; associates transiently with the spliceosomal NTC ("nineteen complex") and acts after Prp2p to promote the first catalytic reaction of splicing
	0.637659352669185	CAGL0I06006g		Ortholog(s) have RNA polymerase I activity and role in transcription elongation from RNA polymerase I promoter, transcription of nuclear large rRNA transcript from RNA polymerase I promoter	C1_10260C	RPA34	Putative RNA polymerase I subunit; rat catheter biofilm induced	YJL148W	RPA34	DNA-directed RNA polymerase I subunit RPA34|CST21|A34.5	RNA polymerase I subunit A34.5; essential for nucleolar assembly and for high polymerase loading rate; nucleolar localization depends on Rpa49p
	0.636437588086456	CAGL0G07975g		Ortholog(s) have role in maturation of 5.8S rRNA from tricistronic rRNA transcript (SSU-rRNA, 5.8S rRNA, LSU-rRNA), maturation of LSU-rRNA from tricistronic rRNA transcript (SSU-rRNA, 5.8S rRNA, LSU-rRNA)	CR_07750C		Ortholog(s) have role in maturation of 5.8S rRNA from tricistronic rRNA transcript (SSU-rRNA, 5.8S rRNA, LSU-rRNA), maturation of LSU-rRNA from tricistronic rRNA transcript (SSU-rRNA, 5.8S rRNA, LSU-rRNA)	YNR038W	DBP6	putative ATP-dependent RNA helicase DBP6	Essential protein involved in ribosome biogenesis; putative ATP-dependent RNA helicase of the DEAD-box protein family; human homolog DDX51 complements yeast dbp6 mutant
	0.635560220159617	CAGL0I09152g		Ortholog(s) have rRNA primary transcript binding, ribonuclease MRP activity, ribonuclease P activity	C6_02910W	POP4	Ortholog of S. cerevisiae Pop4; a subunit of both RNase MRP and nuclear RNase P; filament induced; regulated by Nrg1, Tup1; likely essential, based on UAU1 strategy; rat catheter and Spider biofilm induced	YBR257W	POP4	RNase P/RNase MRP complex subunit	Subunit of both RNase MRP and nuclear RNase P; RNase MRP cleaves pre-rRNA, while nuclear RNase P cleaves tRNA precursors to generate mature 5' ends and facilitates turnover of nuclear RNAs; binds to the RPR1 RNA subunit in RNase P
	0.632969723885697	CAGL0H02431g		Ortholog(s) have role in tRNA methylation and cytosol, nucleus localization	C2_10820C		S. cerevisiae ortholog YMR259C interacts with Trm7 for 2'-O-methylation of C32 of substrate tRNAs; downregulated by fluphenazine treatment or in an azole-resistant strain that overexpresses CDR1 and CDR2	YMR259C	TRM732	tRNA methylation protein TRM732	Protein involved in 2'-O-methylation of C32 of substrate tRNAs; interacts with 2'-O-ribose methyltransferase Trm7p; green fluorescent protein (GFP)-fusion protein localizes to the cytoplasm; non-essential gene; yeast null mutant can be functionally complemented by human THADA, mutations in which have been implicated in epithelial thyroid adenomas, type 2 diabetes, and polycystic ovary syndrome (P…
	0.631561848029609	CAGL0E05434g		Ortholog(s) have sequence-specific DNA binding activity	C3_05470W	TEA1	Putative transcription factor with zinc cluster DNA-binding motif; has similarity to S. cerevisiae Tea1p; Hap43p-repressed gene	YOR337W	TEA1		Ty1 enhancer activator involved in Ty enhancer-mediated transcription; required for full levels of Ty enhancer-mediated transcription; C6 zinc cluster DNA-binding protein
	0.626334178689181	CAGL0B01485g		Ortholog(s) have tRNA methyltransferase activity, role in tRNA methylation, wybutosine biosynthetic process and cytosol, mitochondrion, nucleus localization	C1_01150C		Ortholog(s) have tRNA methyltransferase activity, role in tRNA methylation, wybutosine biosynthetic process and cytosol, mitochondrion, nucleus localization	YOL141W	PPM2	tRNA methyltransferase PPM2|TYW4	AdoMet-dependent tRNA methyltransferase; also involved in methoxycarbonylation; required for the synthesis of wybutosine (yW), a modified guanosine found at the 3'-position adjacent to the anticodon of phe-tRNA; similarity to Ppm1p
	0.623570753578693	CAGL0G07557g		Ortholog(s) have RNA polymerase I upstream control element sequence-specific DNA binding, transcription factor activity, RNA polymerase I upstream control element sequence-specific binding activity				YOR295W	UAF30		Subunit of UAF (upstream activation factor) complex; UAF is an RNA polymerase I specific transcription stimulatory factor composed of Uaf30p, Rrn5p, Rrn9p, Rrn10p, histones H3 and H4; targeting factor for the UAF that facilitates activation of many rDNA genes; deletion decreases cellular growth rate; UAF30 has a paralog, TRI1, that arose from the whole genome duplication
	0.62255022977441	CAGL0K09284g		Ortholog(s) have mRNA binding, snoRNA binding activity	CR_00800C	PWP2	Putative 90S pre-ribosomal component; repressed in core stress response; repressed by prostaglandins; physically interacts with TAP-tagged Nop1; Hap43-induced	YCR057C	PWP2	snoRNA-binding rRNA-processing protein PWP2|UTP1|YCR058C|YCR055C	Conserved 90S pre-ribosomal component; essential for proper endonucleolytic cleavage of the 35 S rRNA precursor at A0, A1, and A2 sites; contains eight WD-repeats; PWP2 deletion leads to defects in cell cycle and bud morphogenesis
	0.619244826385984	CAGL0J11066g		Ortholog(s) have chromatin binding activity and role in DNA replication initiation, pre-replicative complex assembly involved in nuclear cell cycle DNA replication, rRNA processing, response to drug	C7_03850W		Putative intranuclear transport and DNA replication mediator; heterozygous null mutant exhibits resistance to parnafungin in the C. albicans fitness test; Spider biofilm induced	YLR002C	NOC3		Subunit of a nuclear complex with Noc2p and pre-replicative complexes; the Noc2p-Noc3p complex binds to 66S ribosomal precursors to mediate their maturation and intranuclear transport; binds to chromatin at active replication origins, and is required for pre-RC formation and maintenance during DNA replication licensing
	0.619063704602165	CAGL0F01023g		Ortholog(s) have role in maturation of LSU-rRNA from tricistronic rRNA transcript (SSU-rRNA, 5.8S rRNA, LSU-rRNA) and nucleolus, preribosome, large subunit precursor localization	C2_04120C		Ortholog(s) have role in maturation of LSU-rRNA from tricistronic rRNA transcript (SSU-rRNA, 5.8S rRNA, LSU-rRNA) and nucleolus, preribosome, large subunit precursor localization	YOL041C	NOP12		Nucleolar protein involved in pre-25S rRNA processing; also involved in biogenesis of large 60S ribosomal subunit; contains an RNA recognition motif (RRM); binds to Ebp2; similar to Nop13p and Nsr1p
	0.615872616356582	CAGL0L07678g		Putative essential 18S rRNA dimethylase; gene is downregulated in azole-resistant strain
	0.615602840765834	CAGL0B00484g		Ortholog(s) have rRNA (guanine) methyltransferase activity, rRNA (uridine-2'-O-)-methyltransferase activity	C6_04160C	SPB1	Putative AdoMet-dependent methyltransferase; Hap43-induced; repressed by prostaglandins; possibly essential gene, disruptants not obtained by UAU1 method; Spider biofilm induced	YCL054W	SPB1	27S pre-rRNA (guanosine2922-2'-O)-methyltransferase	AdoMet-dependent methyltransferase; involved in rRNA processing and 60S ribosomal subunit maturation; methylates G2922 in the tRNA docking site of the large subunit rRNA and in the absence of snR52, U2921; suppressor of PAB1 mutants
	0.610746526374723	CAGL0H02079g		Ortholog(s) have rRNA primary transcript binding activity	C4_03270W	RPF1	Putative nucleolar protein with a predicted role in the assembly and export of the large ribosomal subunit; essential for growth; rat catheter and Spider biofilm induced	YHR088W	RPF1	rRNA-binding ribosome biosynthesis protein RPF1	Protein involved in assembly and export of the large ribosomal subunit; nucleolar protein; constituent of 66S pre-ribosomal particles; contains a sigma(70)-like motif, which is thought to bind RNA
	0.610730107955461	CAGL0I10560g		Ortholog(s) have snoRNA binding, tRNA binding activity	C3_00330W	UTP8	Essential nucleolar protein; involved in tRNA export from the nucleus and ribosomal small subunit biogenesis; physically interacts with TAP-tagged Nop1; Spider biofilm induced	YGR128C	UTP8		Nucleolar protein required for export of tRNAs from the nucleus; also copurifies with the small subunit (SSU) processome containing the U3 snoRNA that is involved in processing of pre-18S rRNA
	0.61064612609503	CAGL0F01551g		Ortholog(s) have role in maturation of SSU-rRNA from tricistronic rRNA transcript (SSU-rRNA, 5.8S rRNA, LSU-rRNA) and nucleolus localization	C5_01480W	FYV5	Protein with a predicted role maturation of 18S rRNA; rat catheter biofilm induced	YLR068W	FYV7		Essential protein required for maturation of 18S rRNA; required for survival upon exposure to K1 killer toxin
	0.606577258283948	CAGL0H05115g		Ortholog(s) have role in chromatin remodeling and Swr1 complex localization				YLR385C	SWC7	AWS1	Protein of unknown function; component of the Swr1p complex that incorporates Htz1p into chromatin
	0.60426517946866	CAGL0H06985g		Ortholog(s) have role in endonucleolytic cleavage in 5'-ETS of tricistronic rRNA transcript (SSU-rRNA, 5.8S rRNA and LSU-rRNA), more	CR_09800C		Putative U3-containing small subunit processome complex protein; Hap43-induced gene; repressed in core stress response; Spider biofilm induced	YML093W	UTP14		Subunit of U3-containing Small Subunit (SSU) processome complex; involved in production of 18S rRNA and assembly of small ribosomal subunit
	0.601549755344277	CAGL0J05698g		Ortholog(s) have RNA polymerase III activity, role in tRNA transcription from RNA polymerase III promoter, transcription initiation from RNA polymerase III promoter and DNA-directed RNA polymerase III complex localization	CR_02720C	RPC31	Putative RNA polymerase III subunit C31; repressed by nitric oxide; induced during infection of murine kidney, compared to growth in vitro; has murine homolog	YNL151C	RPC31	DNA-directed RNA polymerase III subunit C31|C31|RPC8|ACP2	RNA polymerase III subunit C31
	0.599966989676706	CAGL0J01265g		Ortholog(s) have snoRNA binding activity and role in cellular response to drug, maturation of SSU-rRNA from tricistronic rRNA transcript (SSU-rRNA, 5.8S rRNA, LSU-rRNA), positive regulation of transcription from RNA polymerase I promoter	C2_08670C	UTP15	Small subunit (SSU) processome component; mutation confers resistance to 5-fluorocytosine (5-FC); physically interacts with TAP-tagged Nop1p	YMR093W	UTP15	snoRNA-binding rRNA-processing protein UTP15	Nucleolar protein; component of the small subunit (SSU) processome containing the U3 snoRNA that is involved in processing of pre-18S rRNA
	0.59968731001061	CAGL0G03003g		Ortholog(s) have role in rRNA processing, response to drug, tRNA export from nucleus and CURI complex, UTP-C complex, small-subunit processome localization	C2_02450C	UTP22	Putative U3 snoRNP protein; Ssr1-induced; repressed by prostaglandins; heterozygous null mutant is resistant to parnafungin	YGR090W	UTP22	rRNA-processing protein UTP22	Component of the small-subunit processome; required for nuclear export of tRNAs; may facilitate binding of Utp8p to aminoacylated tRNAs and their delivery to Los1p for export; conserved from yeast to mammals
	0.598558558878545	CAGL0C01419g		Ortholog(s) have mRNA binding, poly(U) RNA binding activity	C6_02690C		Protein with similarity to S. pombe Nrd1p; transcription induced upon induction of hyphal growth; regulated by Cph1p, Efg1p, Cph2p; low-level expression; alkaline upregulated; fungal-specific (no human or murine homolog)	YPL184C	MRN1	PTR69	RNA-binding protein that may be involved in translational regulation; binds specific categories of mRNAs, including those that contain upstream open reading frames (uORFs) and internal ribosome entry sites (IRES); interacts genetically with chromatin remodelers and splicing factors, linking chromatin state, splicing and as a result mRNA maturation
	0.597839975115436	CAGL0B00880g		Ortholog(s) have role in rRNA processing, ribosomal small subunit assembly and CURI complex, UTP-C complex, cytosol localization	C2_02710C		Ortholog(s) have role in rRNA processing, ribosomal small subunit assembly and CURI complex, UTP-C complex, cytosol localization	YCL031C	RRP7		Essential protein involved in rRNA processing and ribosome biogenesis; protein abundance increases in response to DNA replication stress
	0.597534212914402	CAGL0H04829g		Ortholog(s) have chromatin binding activity, role in RNA polymerase II transcriptional preinitiation complex assembly and transcription factor TFIID complex localization	C3_03930W		Ortholog(s) have chromatin binding activity, role in RNA polymerase II transcriptional preinitiation complex assembly and transcription factor TFIID complex localization	YML015C	TAF11	TafII40|TAF40	TFIID subunit (40 kDa); involved in RNA polymerase II transcription initiation, similar to histone H3 with atypical histone fold motif of Spt3-like transcription factors
	0.594089531024254	CAGL0F04983g		Ortholog(s) have ATP-dependent DNA helicase activity, ATP-dependent DNA/RNA helicase activity, ATP-dependent RNA helicase activity, mRNA binding activity	C6_01890C		Putative DEAD-box helicase; Hap43-induced; Spider biofilm induced	YLR276C	DBP9	ATP-dependent DNA/RNA helicase	DEAD-box protein required for 27S rRNA processing; exhibits DNA, RNA and DNA/RNA helicase activities; ATPase activity shows preference for DNA over RNA; DNA helicase activity abolished by mutation in RNA-binding domain
	0.59403228879458	CAGL0F07645g		Ortholog(s) have role in endonucleolytic cleavage in 5'-ETS of tricistronic rRNA transcript (SSU-rRNA, 5.8S rRNA and LSU-rRNA), more	CR_03360W		Ortholog(s) have role in endonucleolytic cleavage in 5'-ETS of tricistronic rRNA transcript (SSU-rRNA, 5.8S rRNA and LSU-rRNA), more	YKL099C	UTP11	rRNA-processing protein UTP11	Subunit of U3-containing Small Subunit (SSU) processome complex; involved in production of 18S rRNA and assembly of small ribosomal subunit
	0.591422128772866	CAGL0M11814g		Ortholog(s) have role in generation of catalytic spliceosome for second transesterification step and U2-type catalytic step 1 spliceosome, U2-type catalytic step 2 spliceosome, post-mRNA release spliceosomal complex localization	C6_02440C	PRP45	Protein required for pre-mRNA splicing; Spider biofilm induced	YAL032C	PRP45	mRNA splicing protein PRP45|FUN20	Protein required for pre-mRNA splicing; associates with the spliceosome and interacts with splicing factors Prp22p and Prp46p; orthologous to human transcriptional coactivator SKIP and can activate transcription of a reporter gene
	0.589597958427756	CAGL0L02871g		Ortholog(s) have mRNA binding activity	CR_05520W	NOC2	Putative nucleolar complex protein; Hap43-induced; transposon mutation affects filamentous growth; mutation confers hypersensitivity to 5-fluorouracil (5-FU), tubercidin (7-deazaadenosine); repressed in core stress response	YOR206W	NOC2	mRNA-binding ribosome synthesis protein NOC2	Protein involved in ribosome biogenesis; forms a nucleolar complex with Mak21p that binds to 90S and 66S pre-ribosomes; forms a nuclear complex with Noc3p that binds to 66S pre-ribosomes; both complexes mediate intranuclear transport of ribosomal precursors; acts as part of a Mak21p-Noc2p-Rrp5p module that associates with nascent pre-rRNA during transcription and has a role in bigenesis of the la…
	0.589025386226924	CAGL0M04477g		Ortholog(s) have transcription factor activity, RNA polymerase I upstream control element sequence-specific binding activity and role in chromatin organization, transcription of nuclear large rRNA transcript from RNA polymerase I promoter	C7_01400C		Ortholog(s) have transcription factor activity, RNA polymerase I upstream control element sequence-specific binding activity and role in chromatin organization, transcription of nuclear large rRNA transcript from RNA polymerase I promoter	YLR141W	RRN5		Protein involved in transcription of rDNA by RNA polymerase I; transcription factor, member of UAF (upstream activation factor) family along with Rrn9p and Rrn10p
	0.58687110288041	CAGL0M06941g		Ortholog(s) have rRNA (cytosine-C5-)-methyltransferase activity, role in rRNA base methylation and nucleolus localization	CR_02030C		S. pombe ortholog SPAC2C4.06c is a predicted tRNA (cytosine-5-)-methyltransferase; Spider biofilm induced	YNL022C	RCM1	rRNA (cytosine-C5-)-methyltransferase RCM1	rRNA m5C methyltransferase; methylates cytosine at position 2278 of 25S rRNA while Nop2p methylates cytosine at position 2870; contains seven beta-strand methyltransferase motif; localized to the nucleolus; interacts with Trm112p; homolog of NSUN5A, a human gene which is deleted in Williams-Beuren Syndrome
	0.583763315653592	CAGL0D00880g		Ortholog(s) have ribonucleoprotein complex binding activity and role in endonucleolytic cleavage to generate mature 3'-end of SSU-rRNA from (SSU-rRNA, 5.8S rRNA, LSU-rRNA)	CR_08490W	TSR1	Component of 20S pre-rRNA processing unit; repressed by prostaglandins	YDL060W	TSR1		Protein required for processing of 20S pre-rRNA in the cytoplasm; associates with pre-40S ribosomal particles; inhibits the premature association of 60S subunits with assembling 40S subunits in the cytoplasm; similar to Bms1p; relocalizes from nucleus to cytoplasm upon DNA replication stress
	0.582767546299168	CAGL0F00561g		Ortholog(s) have RNA polymerase I activity, RNA polymerase II sequence-specific DNA binding transcription factor binding activity	C2_07300C	RPA12	Putative DNA-directed RNA polymerase I; induced upon adherence to polystyrene	YJR063W	RPA12	DNA-directed RNA polymerase I core subunit RPA12|A12.2|RRN4	RNA polymerase I subunit A12.2; contains two zinc binding domains, and the N terminal domain is responsible for anchoring to the RNA pol I complex; physically interacts with transcriptional activator Msn4p, to regulate transcription of AYR1, a gene involved in lipid metabolism
	0.582359048410914	CAGL0G10109g		Ortholog(s) have RNA polymerase III activity, role in tRNA transcription from RNA polymerase III promoter and DNA-directed RNA polymerase III complex, mitotic spindle pole body localization	CR_02890C		Ortholog(s) have RNA polymerase III activity, role in tRNA transcription from RNA polymerase III promoter and DNA-directed RNA polymerase III complex, mitotic spindle pole body localization	YPR190C	RPC82	DNA-directed RNA polymerase III subunit C82|RPC80|RPC3	RNA polymerase III subunit C82
	0.57878902348723	CAGL0I09768g		Ortholog(s) have role in mRNA splicing, via spliceosome, maturation of 5S rRNA and U4/U6 x U5 tri-snRNP complex localization	C5_03010W		Ortholog(s) have role in mRNA splicing, via spliceosome, maturation of 5S rRNA and U4/U6 x U5 tri-snRNP complex localization	YOR308C	SNU66	U4/U6-U5 snRNP complex subunit SNU66	Component of the U4/U6.U5 snRNP complex; involved in pre-mRNA splicing via spliceosome; also required for pre-5S rRNA processing and may act in concert with Rnh70p; has homology to human SART-1
	0.578692982873627	CAGL0E02585g		Ortholog(s) have 3'-5'-exoribonuclease activity	C1_05050C	RRP6	Putative nuclear exosome exonuclease component; Hap43p-induced gene; mutation confers hypersensitivity to 5-fluorocytosine (5-FC), 5-fluorouracil (5-FU), and tubercidin (7-deazaadenosine)	YOR001W	RRP6	exosome nuclease subunit RRP6	Nuclear exosome exonuclease component; has 3'-5' exonuclease activity that is regulated by Lrp1p; involved in RNA processing, maturation, surveillance, degradation, tethering, and export; role in sn/snoRNAs precursor degradation; forms a stable heterodimer with Lrp1p; has similarity to E. coli RNase D and to human PM-Sc1 100 (EXOSC10); mutant displays reduced transcription elongation in the G-les…
	0.578533282316663	CAGL0L08206g		Ortholog(s) have role in exonucleolytic trimming to generate mature 3'-end of 5.8S rRNA from tricistronic rRNA transcript (SSU-rRNA, 5.8S rRNA and LSU-rRNA), more	C1_06540C		Exosome non-catalytic core component; involved in 3'-5' RNA processing and degradation in the nucleus and cytoplasm; Spider biofilm induced	YCR035C	RRP43	exosome non-catalytic core subunit RRP43	Exosome non-catalytic core component; involved in 3'-5' RNA processing and degradation in both the nucleus and the cytoplasm; has similarity to E. coli RNase PH and to human hRrp43p (OIP2, EXOSC8); protein abundance increases in response to DNA replication stress
	0.576571655583721	CAGL0K02233g		Ortholog(s) have role in maturation of 5.8S rRNA from tricistronic rRNA transcript (SSU-rRNA, 5.8S rRNA, LSU-rRNA), maturation of LSU-rRNA from tricistronic rRNA transcript (SSU-rRNA, 5.8S rRNA, LSU-rRNA)	C3_06380W	NSA2	Putative protein constituent of 66S pre-ribosomal particles; Hap43-induced; repressed by prostaglandins	YER126C	NSA2	rRNA-processing protein NSA2	Protein constituent of 66S pre-ribosomal particles; contributes to processing of the 27S pre-rRNA; recruited by ribosomal proteins L17, L35, and L37 to assembling ribosomes after 27SB pre-rRNA is generated, immediately preceding removal of ITS2
	0.575924006790157	CAGL0I02310g		Ortholog(s) have nucleic acid binding activity and role in DNA recombination, mRNA export from nucleus, telomere maintenance, transcription elongation from RNA polymerase II promoter				YHR167W	THP2		Subunit of the THO and TREX complexes; THO connects transcription elongation and mitotic recombination, and TREX is recruited to activated genes and couples transcription to mRNA export; involved in telomere maintenance
	0.570482661320156	CAGL0K06523g		Ortholog(s) have histone methyltransferase activity (H3-K4 specific) activity, role in chromatin silencing at telomere, histone H3-K4 methylation and Set1C/COMPASS complex localization	C5_04160W	SDC1	Putative COMPASS/SET1C histone methyltransferase complex subunit	YDR469W	SDC1	SAF19|CPS25	Subunit of the COMPASS (Set1C) complex; COMPASS methylates lysine 4 of histone H3 and is required in chromatin silencing at telomeres; contains a Dpy-30 domain that mediates interaction with Bre2p; similar to C. elegans and human DPY-30
	0.56929424192185	CAGL0L10934g		Ortholog(s) have tRNA binding, tRNA dimethylallyltransferase activity, role in tRNA modification, transfer RNA gene-mediated silencing and cytosol, mitochondrion, nucleolus localization	C1_09390W		Ortholog(s) have tRNA binding, tRNA dimethylallyltransferase activity, role in tRNA modification, transfer RNA gene-mediated silencing and cytosol, mitochondrion, nucleolus localization	YOR274W	MOD5	tRNA dimethylallyltransferase|[MOD+]	Delta 2-isopentenyl pyrophosphate:tRNA isopentenyl transferase; required for biosynthesis of isopentenyladenosine in mitochondrial and cytoplasmic tRNAs; also has a role in tRNA gene-mediated silencing; gene encodes two isozymic forms; converts to a prion form, prion conversion contributes to azole antifungal resistance by upregulating ergosterol biosynthesis; homolog of human TRIT1, a mutation i…
	0.568829403185909	CAGL0H04235g		Ortholog(s) have tRNA dihydrouridine synthase activity, role in tRNA modification and mitochondrion, nucleus localization	C2_09500W		Predicted tRNA dihydrouridine synthase; Spider biofilm induced	YML080W	DUS1	tRNA dihydrouridine synthase	Dihydrouridine synthase; member of a widespread family of conserved proteins including Smm1p, Dus3p, and Dus4p; modifies pre-tRNA(Phe) at U17
	0.567788706023177	CAGL0D00682g		Has domain(s) with predicted nucleic acid binding activity
	0.567539324902415	CAGL0H01331g		Ortholog(s) have DNA binding, chromatin binding, histone deacetylase activity	C3_03670W		Ortholog(s) have DNA binding, chromatin binding, histone deacetylase activity	YDR295C	HDA2	PLO2	Subunit of the HDA1 histone deacetylase complex; possibly tetrameric trichostatin A-sensitive class II histone deacetylase complex contains Hda1p homodimer and an Hda2p-Hda3p heterodimer; involved in telomere maintenance; relocalizes to the cytosol in response to hypoxia
	0.567419772767352	CAGL0M07678g		Ortholog(s) have role in maturation of SSU-rRNA and 90S preribosome, nucleolus localization	CR_00680W	BUD22	Protein with a predicted role in 18S rRNA maturation and small ribosomal subunit biogenesis; repressed in core stress response; repressed by prostaglandins	YMR014W	BUD22		Protein required for rRNA maturation and ribosomal subunit biogenesis; required for 18S rRNA maturation; also required for small ribosomal subunit biogenesis; cosediments with pre-ribosomal particles; mutation decreases efficiency of +1 Ty1 frameshifting and transposition, and affects budding pattern
	0.565055441013246	CAGL0C01639g		Ortholog(s) have snoRNA binding activity	C7_03700C	ENP1	Protein required for pre-rRNA processing and 40S ribosomal subunit synthesis; associated with U3 and U14 snoRNAs; transposon mutation affects filamentous growth; repressed by prostaglandins; Spider biofilm induced	YBR247C	ENP1	snoRNA-binding rRNA-processing protein ENP1|MEG1	Protein associated with U3 and U14 snoRNAs; required for pre-rRNA processing and 40S ribosomal subunit synthesis; localized in the nucleus and concentrated in the nucleolus; human BYSL functionally complements the heat sensitivity of an enp1 ts mutant
	0.564967578346109	CAGL0M03091g		Ortholog(s) have 2',3'-cyclic-nucleotide 3'-phosphodiesterase activity, GTP-dependent polyribonucleotide 5'-hydroxyl-kinase activity, RNA ligase (ATP) activity	C7_02060W	LIG1	tRNA ligase; functional homolog of S. cerevisiae Trl1	YJL087C	TRL1	tRNA ligase|RLG1|LIG1	tRNA ligase; required for tRNA splicing and for both splicing and translation of HAC1 mRNA in the UPR; has phosphodiesterase, polynucleotide kinase, and ligase activities; localized at the inner nuclear envelope and partially to polysomes
	0.559642067085603	CAGL0A03652g		Ortholog(s) have role in maturation of 5.8S rRNA from tricistronic rRNA transcript (SSU-rRNA, 5.8S rRNA, LSU-rRNA), maturation of LSU-rRNA from tricistronic rRNA transcript (SSU-rRNA, 5.8S rRNA, LSU-rRNA) and nucleolus localization	C2_05090W	MAK5	Putative nucleolar DEAD-box RNA helicase; oxidative stress-repressed via Cap1; repressed by prostaglandins	YBR142W	MAK5	putative ATP-dependent RNA helicase	Essential nucleolar protein; putative DEAD-box RNA helicase required for maintenance of M1 dsRNA virus; involved in biogenesis of large (60S) ribosomal subunits
	0.559143834581404	CAGL0F03333g		Ortholog(s) have TBP-class protein binding, transcription factor activity, RNA polymerase I upstream control element sequence-specific binding activity				YMR270C	RRN9		Protein involved in promoting high level transcription of rDNA; subunit of UAF (upstream activation factor) for RNA polymerase I
	0.553833835975204	CAGL0H10384g		Ortholog(s) have role in exonucleolytic trimming to generate mature 3'-end of 5.8S rRNA from tricistronic rRNA transcript (SSU-rRNA, 5.8S rRNA, LSU-rRNA), nuclear polyadenylation-dependent tRNA catabolic process, rRNA catabolic process	C4_03840C	RRP42	Putative exosome non-catalytic core component; involved in 3'-5' RNA processing; rat catheter biofilm induced	YDL111C	RRP42	exosome non-catalytic core subunit RRP42	Exosome non-catalytic core component; involved in 3'-5' RNA processing and degradation in both the nucleus and the cytoplasm; has similarity to E. coli RNase PH and to human hRrp42p (EXOSC7)
	0.552827997635805	CAGL0J03014g		Ortholog(s) have role in regulation of transcription, DNA-templated and cytoplasm, nucleus localization				YER064C	VHR2		Non-essential nuclear protein; null mutation has global effects on transcription; VHR2 has a paralog, VHR1, that arose from the whole genome duplication; relative distribution to the nucleus increases upon DNA replication stress
	0.552368859273886	CAGL0B04169g		Ortholog(s) have mRNA binding, rRNA primary transcript binding activity	C3_02020W		Ortholog(s) have mRNA binding, rRNA primary transcript binding activity	YPR112C	MRD1	RNA-binding ribosome biosynthesis protein MRD1	Essential conserved small ribosomal subunit (40s) synthesis factor; component of the 90S preribosome; required for production of 18S rRNA and small ribosomal subunit; contains five consensus RNA-binding domains and binds to the pre-rRNA at two sites within the 18S region
	0.551528009467555	CAGL0D02354g		Ortholog(s) have pre-mRNA branch point binding activity, role in mRNA splicing, via spliceosome and commitment complex, cytosol localization	C3_03300C		Putative pre-mRNA branch point binding protein; role in mRNA splicing via spliceosome; Spider biofilm repressed	YLR116W	MSL5	mRNA splicing protein MSL5|BBP	Component of commitment complex; which defines first step in splicing pathway; essential protein that interacts with Mud2p and Prp40p, forming a bridge between the intron ends; also involved in nuclear retention of pre-mRNA; relocalizes to the cytosol in response to hypoxia
	0.549140051674245	CAGL0B00374g		Ortholog(s) have RNA polymerase II regulatory region DNA binding activity				YCL058W-A	ADF1		Transcriptional repressor encoded by the FYV5 antisense strand; negatively regulates transcription of FYV5 by binding to the promoter on the sense strand
	0.548678745609803	CAGL0M02409g		Ortholog(s) have rRNA binding activity, role in maturation of LSU-rRNA from tricistronic rRNA transcript (SSU-rRNA, 5.8S rRNA, LSU-rRNA), ribosomal large subunit export from nucleus and nucleolus localization	C2_05750W		Ortholog(s) have rRNA binding activity, role in maturation of LSU-rRNA from tricistronic rRNA transcript (SSU-rRNA, 5.8S rRNA, LSU-rRNA), ribosomal large subunit export from nucleus and nucleolus localization	YPL146C	NOP53	RRP16	Nucleolar protein; involved in biogenesis of the 60S subunit of the ribosome; interacts with rRNA processing factors Cbf5p and Nop2p and with the nucleolar proteins Nop17p and Nip7p; null mutant is viable but growth is severely impaired
	0.54552810603822	CAGL0L02739g		Ortholog(s) have histone acetyltransferase activity, role in chromatin silencing at telomere and SAS acetyltransferase complex, nuclear chromatin localization				YOR213C	SAS5		Subunit of the SAS complex (Sas2p, Sas4p, Sas5p); acetylates free histones and nucleosomes and regulates transcriptional silencing; stimulates Sas2p HAT activity
	0.537925040206181	CAGL0E05676g		Ortholog(s) have role in wybutosine biosynthetic process and endoplasmic reticulum localization	C6_02290C		Putative flavodoxin; similar to S. cerevisiae Tyw1, an iron-sulfur protein required for synthesis of wybutosine modified tRNA; predicted Kex2p substrate; Spider biofilm induced	YPL207W	TYW1	putative tRNA 4-demethylwyosine synthase	Iron-sulfer protein required for synthesis of Wybutosine modified tRNA; Wybutosine is a modified guanosine found at the 3'-position adjacent to the anticodon of phenylalanine tRNA which supports reading frame maintenance by stabilizing codon-anticodon interactions; induction by Yap5p in response to iron provides protection from high iron toxicity; overexpression results in increased cellular iron
	0.53692780642996	CAGL0L00341g		Ortholog(s) have mRNA binding activity, role in nuclear division, rRNA processing, ribosomal large subunit biogenesis and mitotic spindle pole body, nuclear periphery, nucleolus, preribosome, large subunit precursor localization	C2_04570W		Ortholog(s) have mRNA binding activity, role in nuclear division, rRNA processing, ribosomal large subunit biogenesis and mitotic spindle pole body, nuclear periphery, nucleolus, preribosome, large subunit precursor localization	YKL172W	EBP2		Required for 25S rRNA maturation and 60S ribosomal subunit assembly; localizes to the nucleolus and in foci along nuclear periphery; constituent of 66S pre-ribosomal particles; cooperates with Rrs1p and Mps3p to mediate telomere clustering by binding Sir4p, but is not involved in telomere tethering
	0.53369099312878	CAGL0E01903g		Ortholog(s) have tRNA methyltransferase activity, role in tRNA methylation and cytosol, nucleolus localization	CR_00670C		Putative 2'-O-methyltransferase with a predicted role in tRNA modification; transcription is activated in the presence of elevated CO2	YOL125W	TRM13	tRNA:m4X modification enzyme	2'-O-methyltransferase; responsible for modification of tRNA at position 4; C-terminal domain has similarity to Rossmann-fold (RFM) superfamily of RNA methyltransferases
	0.533663041298428	CAGL0L02585g		Has domain(s) with predicted DNA binding, chromatin binding activity
	0.532181552822089	CAGL0A00935g		Ortholog(s) have role in generation of catalytic spliceosome for first transesterification step, snoRNA splicing and U2-type spliceosomal complex localization	C2_00280C		Putative pre-mRNA-splicing factor; possibly an essential gene, disruptants not obtained by UAU1 method	YLR323C	CWC24	U2-type spliceosomal complex subunit CWC24	General splicing factor; required for stable U2 snRNP binding to primary transcripts; essential for the first step of splicing; component of the pre-catalytic spliceosome complex containing Cef1p; similar to S. pombe Cwf24p
	0.532121035490345	CAGL0J10252g		Ortholog(s) have rRNA primary transcript binding, single-stranded telomeric DNA binding, snoRNA binding activity, role in rRNA processing, ribosomal small subunit biogenesis and Mpp10 complex, small-subunit processome localization	CR_07950W	IMP4	Putative SSU processome component; Hap43-induced; repressed by prostaglandins; Spider biofilm induced	YNL075W	IMP4	snoRNA-binding rRNA-processing protein IMP4	Component of the SSU processome; SSU processome is required for pre-18S rRNA processing; interacts with Mpp10p; member of a superfamily of proteins that contain a sigma(70)-like motif and associate with RNAs
	0.531894258115559	CAGL0L12408g		Ortholog(s) have tRNA (uracil) methyltransferase activity, role in tRNA methylation and cytosol, nucleus localization	C1_04530C		Putative tRNA U44 2'-O-methyltransferase; virulence-group-correlated expression; induced during oral infection; mutants have reduced ability to damage oral epithelial cells; early-stage flow model biofilm induced	YPL030W	TRM44	tRNA (uracil) methyltransferase	tRNA(Ser) Um(44) 2'-O-methyltransferase; involved in maintaining levels of the tRNA-Ser species tS(CGA) and tS(UGA); conserved among metazoans and fungi but there does not appear to be a homolog in plants; TRM44 is a non-essential gene
	0.530762348470105	CAGL0G02629g		Ortholog(s) have rRNA (uridine-N3-)-methyltransferase activity, role in rRNA base methylation and nucleolus localization	C3_05860C		Ortholog(s) have rRNA (uridine-N3-)-methyltransferase activity, role in rRNA base methylation and nucleolus localization	YIL096C	BMT5	25S rRNA (uracil2634-N3)-methyltransferase	Methyltransferase required for m3U2634 methylation of the 25S rRNA; S-adenosylmethionine-dependent; associates with precursors of the 60S ribosomal subunit; predicted to be involved in ribosome biogenesis
	0.529523269626407	CAGL0M03905g		Ortholog(s) have role in endonucleolytic cleavage in ITS1 to separate SSU-rRNA from 5.8S rRNA and LSU-rRNA from tricistronic rRNA transcript (SSU-rRNA, 5.8S rRNA, LSU-rRNA) and 90S preribosome, nucleolus localization	C3_02350W		Ortholog(s) have role in endonucleolytic cleavage in ITS1 to separate SSU-rRNA from 5.8S rRNA and LSU-rRNA from tricistronic rRNA transcript (SSU-rRNA, 5.8S rRNA, LSU-rRNA)	YNL308C	KRI1		Essential nucleolar protein required for 40S ribosome biogenesis; associate with snR30; physically and functionally interacts with Krr1p
	0.526021704076387	CAGL0B01463g		Ortholog(s) have RNA binding, manganese ion binding activity	C1_01160C		Exosome non-catalytic core component; involved in 3'-5' RNA processing and degradation in the nucleus and cytoplasm; Spider biofilm induced	YOL142W	RRP40	exosome non-catalytic core subunit RRP40|MTR14	Exosome non-catalytic core component; involved in 3'-5' RNA processing and degradation in both the nucleus and the cytoplasm; predicted to contain both S1 and KH RNA binding domains; mutations in the human homolog, EXOSC3, cause pontocerebellar hypoplasia with motor neuron degeneration
	0.525230172831681	CAGL0D05588g		Ortholog(s) have mRNA binding activity, role in maturation of SSU-rRNA from tricistronic rRNA transcript (SSU-rRNA, 5.8S rRNA, LSU-rRNA) and 90S preribosome, mitotic spindle, nucleolus, small-subunit processome localization	C3_00560C	SOF1	Putative protein with a predicted role in 40S ribosomal subunit biogenesis; rat catheter biofilm induced	YLL011W	SOF1	rRNA-processing protein SOF1	Protein required for biogenesis of 40S (small) ribosomal subunit; has similarity to the beta subunit of trimeric G-proteins and the splicing factor Prp4p; essential gene
	0.524543149093991	CAGL0D04884g		Ortholog(s) have snoRNA binding activity, role in cellular response to drug and 90S preribosome, box C/D snoRNP complex, small-subunit processome localization	CR_02710W	RRP9	Ribosomal protein; mutation confers resistance to 5-fluorocytosine (5-FC), 5-fluorouracil (5-FU), and tubercidin (7-deazaadenosine); physically interacts with TAP-tagged Nop1; Hap43-induced; Spider biofilm induced	YPR137W	RRP9		Protein involved in pre-rRNA processing; associated with U3 snRNP; component of small ribosomal subunit (SSU) processosome; ortholog of the human U3-55k protein
	0.524045877563403	CAGL0M01056g		Ortholog(s) have role in endonucleolytic cleavage in 5'-ETS of tricistronic rRNA transcript (SSU-rRNA, 5.8S rRNA and LSU-rRNA), more	C5_03920C		Putative rRNA processing protein; Spider biofilm induced	YDR339C	FCF1	rRNA-processing protein FCF1|UTP24	Putative PINc domain nuclease; required for early cleavages of 35S pre-rRNA and maturation of 18S rRNA; component of the SSU (small subunit) processome involved in 40S ribosomal subunit biogenesis; copurifies with Faf1p
	0.520995555954765	CAGL0I04290g		Ortholog(s) have single-stranded telomeric DNA binding activity, role in regulation of translational fidelity, tRNA threonylcarbamoyladenosine modification, telomere maintenance and cytosol, nucleus localization	C7_00330C		Ortholog(s) have single-stranded telomeric DNA binding activity, role in regulation of translational fidelity, tRNA threonylcarbamoyladenosine modification, telomere maintenance and cytosol, nucleus localization	YGL169W	SUA5	threonylcarbamoyladenylate synthase	Protein involved in threonylcarbamoyl adenosine biosynthesis; Sua5p and Qri7p are necessary and sufficient for RNA t6A modification in vitro; null mutant lacks N6-threonylcarbamoyl adenosine (t6A) modification in the anticodon loop of ANN-decoding tRNA; member of conserved YrdC/Sua5 family; binds single-stranded telomeric DNA and null mutant has abnormal telomere length
	0.520806087505645	CAGL0L10120g		Ortholog(s) have 5'-3' exoribonuclease activity, mRNA binding, microtubule binding, recombinase activity	C4_01080W	RAT1	5'-->3' exoribonuclease; similar to S. cerevisiae nuclear exoribonuclease Rat1p; suppresses S. cerevisiae kem1 mutant slow growth, mating defect, and haploid invasive growth defect	YOR048C	RAT1	ssRNA exonuclease RAT1|XRN2|TAP1|HKE1	Nuclear 5' to 3' single-stranded RNA exonuclease; involved in RNA metabolism, including rRNA and snoRNA processing, as well as poly (A+) dependent and independent mRNA transcription termination; required for cotranscriptional pre-rRNA cleavage; displaces Cdk1p from elongating transcripts, especially as RNAPII reaches the poly(A) site, negatively regulates phosphorylation of the CTD of RNAPII, and…
	0.519492187975126	CAGL0K05555g		Ortholog(s) have snoRNA binding activity	C3_00370C	BUD21	Small-subunit processome component; repressed by prostaglandins	YOR078W	BUD21	YOR29-29|UTP16	Component of small ribosomal subunit (SSU) processosome; this complex contains U3 snoRNA; required at post-transcriptional step for efficient retrotransposition; absence results in decreased Ty1 Gag:GFP protein levels; originally isolated as bud-site selection mutant that displays a random budding pattern
	0.518878070454118	CAGL0I01606g		Ortholog(s) have role in rRNA metabolic process, ribosome biogenesis and nucleolus localization	C3_04370C		Putative nucleolar preribosomal-associated protein; decreased transcription is observed upon benomyl treatment or in an azole-resistant strain that overexpresses MDR1; Spider biofilm induced	YJR041C	URB2	NPA2	Protein required for normal metabolism of the rRNA primary transcript; nucleolar protein; proposed to be involved in ribosome biogenesis
	0.514452483871741	CAGL0E05478g		Ortholog(s) have RNA polymerase I activity, role in transcription of nuclear large rRNA transcript from RNA polymerase I promoter and DNA-directed RNA polymerase I complex localization	CR_01950W		Ortholog(s) have RNA polymerase I activity, role in transcription of nuclear large rRNA transcript from RNA polymerase I promoter and DNA-directed RNA polymerase I complex, cytosol localization	YOR340C	RPA43	DNA-directed RNA polymerase I subunit RPA43|A43	RNA polymerase I subunit A43
	0.511711297311867	CAGL0M04719g		Ortholog(s) have role in cleavage involved in rRNA processing, maturation of SSU-rRNA from tricistronic rRNA transcript (SSU-rRNA, 5.8S rRNA, LSU-rRNA) and 90S preribosome, nucleolus localization	CR_07030C		Putative 90S preribosome component; Hap43p-induced gene; possibly an essential gene, disruptants not obtained by UAU1 method	YOR287C	RRP36	rRNA-processing protein RRP36	Component of 90S preribosomes; involved in early cleavages of the 35S pre-rRNA and in production of the 40S ribosomal subunit
	0.511415985653076	CAGL0K03795g		Ortholog(s) have RNA helicase activity, role in maturation of SSU-rRNA from tricistronic rRNA transcript (SSU-rRNA, 5.8S rRNA, LSU-rRNA) and 90S preribosome, mitochondrion, nucleolus, small-subunit processome localization	C2_00410C		Ortholog of S. cerevisiae Ecm16, an essential DEAH-box ATP-dependent RNA helicase specific to the U3 snoRNP required for 18S rRNA synthesis; Hap43-induced; Spider biofilm induced	YMR128W	ECM16	ATP-dependent RNA helicase ECM16|DHR1	Essential DEAH-box ATP-dependent RNA helicase specific to U3 snoRNP; predominantly nucleolar in distribution; required for 18S rRNA synthesis
	0.511011954569443	CAGL0I07975g		Ortholog(s) have 5S rRNA binding, rRNA primary transcript binding activity	C1_12310C	CSI2	Putative 66S pre-ribosomal particle component; Hap43-induced; essential for growth; transposon mutation affects filamentous growth; Spider biofilm induced	YOL077C	BRX1		Nucleolar protein; constituent of 66S pre-ribosomal particles; depletion leads to defects in rRNA processing and a block in the assembly of large ribosomal subunits; possesses a sigma(70)-like RNA-binding motif
	0.509507365757586	CAGL0L07458g		Ortholog(s) have role in mRNA splicing, via spliceosome and Prp19 complex, post-mRNA release spliceosomal complex localization	C2_10810W		Putative pre-mRNA splicing factor; intron in 5'-UTR; possibly an essential gene, disruptants not obtained by UAU1 method	YBR065C	ECM2	SLT11	Pre-mRNA splicing factor; facilitates the cooperative formation of U2/U6 helix II in association with stem II in the spliceosome, function may be regulated by Slu7p
	0.50778858111508	CAGL0L03025g		Ortholog(s) have RNA polymerase III activity, role in tRNA transcription from RNA polymerase III promoter and DNA-directed RNA polymerase III complex, cytosol localization	C7_01210C		Predicted RNA polymerase III subunit C37; Spider biofilm induced	YKR025W	RPC37	DNA-directed RNA polymerase III subunit C37|C37	RNA polymerase III subunit C37
	0.506077887249631	CAGL0K09416g		Ortholog(s) have tRNA binding activity, role in protein urmylation, tRNA wobble position uridine thiolation and cytosol, mitochondrion localization	C4_01500W		Protein required for thiolation of uridine at wobble position of Gln, Lys, and Glu tRNAs; has a role in urmylation; S. cerevisiae ortholog has a role in invasive and pseudohyphal growth	YGL211W	NCS6	TUC1|YGL210W-A	Protein required for uridine thiolation of Gln, Lys, and Glu tRNAs; required for the thiolation of uridine at the wobble position of Gln, Lys, and Glu tRNAs; has a role in urmylation and in invasive and pseudohyphal growth; inhibits replication of Brome mosaic virus in S. cerevisiae
	0.50483978517093	CAGL0K00473g		Ortholog(s) have Ran GTPase binding activity, role in tRNA re-export from nucleus and cytosol, mitochondrion, nuclear envelope, nuclear matrix localization	C7_04200C		Putative exportin, member of the Exportin-T family; flow model biofilm repressed	YKL205W	LOS1	Ran GTPase-binding protein LOS1	Nuclear pore protein; involved in nuclear export of pre-tRNA and in re-export of mature tRNAs after their retrograde import from the cytoplasm; deletion mutation extends replicative lifespan, as does exclusion of Los1p from the nucleus in response to caloric restriction
	0.500720245913607	CAGL0K10010g		Ortholog(s) have rRNA (adenine) methyltransferase activity and role in rRNA methylation, ribosomal large subunit biogenesis	C2_08480W	RRP8	Ribosomal protein; Hap43-induced; F-12/CO2 early biofilm and rat catheter biofilm induced	YDR083W	RRP8	25S rRNA (adenine645-N1)-methyltransferase	Nucleolar S-adenosylmethionine-dependent rRNA methyltransferase; methylates adenine (m1A) of the large subunit (LSU) rRNA at position 645; involved in pre-rRNA cleavage at site A2; mutation is synthetically lethal with a gar1 mutation; deletion disrupts telomere maintenance by influencing the expression of neighboring gene STN1
	0.500679718977123	CAGL0L11198g		Ortholog(s) have ATP-dependent 5'-3' DNA helicase activity, G-quadruplex DNA binding, single-stranded DNA binding, single-stranded DNA-dependent ATP-dependent DNA helicase activity, telomerase inhibitor activity	CR_07360W	PIF1	DNA helicase and 3'-5' exonuclease; decreased transcription is observed upon fluphenazine treatment	YML061C	PIF1	DNA helicase PIF1|TST1	DNA helicase, potent G-quadruplex DNA binder/unwinder; possesses strand annealing activity; promotes DNA synthesis during break-induced replication; important for crossover recombination; translation from different start sites produces mitochondrial and nuclear forms; nuclear form is a catalytic inhibitor of telomerase; mitochondrial form involved in DNA repair and recombination; mutations affect…
	0.500015499155731	CAGL0C00737g		Ortholog(s) have snoRNA binding activity	C5_02550C	UTP13	Putative U3 snoRNA-associated protein; Hap43-induced; repressed in core stress response; physically interacts with TAP-tagged Nop1	YLR222C	UTP13		Nucleolar protein; component of the small subunit (SSU) processome containing the U3 snoRNA that is involved in processing of pre-18S rRNA
	-0.529420117726464	CAGL0M10956g		Ortholog(s) have role in tRNA export from nucleus and cytosol, extracellular region, nucleus localization	C2_09970C		Putative protein of unknown function; stationary phase enriched protein	YNR034W	SOL1		Protein with a possible role in tRNA export; shows similarity to 6-phosphogluconolactonase non-catalytic domains but does not exhibit this enzymatic activity; homologous to Sol3p and Sol4p; SOL1 has a paralog, SOL2, that arose from the whole genome duplication; protein abundance increases in response to DNA replication stress
	-0.556584498229525	CAGL0F06875g		Ortholog(s) have mRNA binding, saccharopine dehydrogenase (NAD+, L-lysine-forming) activity, role in lysine biosynthetic process via aminoadipic acid and cytoplasm localization	C4_05320W	LYS1	Saccharopine dehydrogenase (biosynthetic); enzyme of alpha-aminoadipate lysine biosynthesis pathway; functionally complements S. cerevisiae lys1 mutation; fungal-specific (no human or murine homolog)	YIR034C	LYS1	saccharopine dehydrogenase (NAD+, L-lysine-forming)	Saccharopine dehydrogenase (NAD+, L-lysine-forming); catalyzes the conversion of saccharopine to L-lysine, which is the final step in the lysine biosynthesis pathway; also has mRNA binding activity
	-0.57736952964955	CAGL0H03707g		Ortholog(s) have misfolded protein binding activity	CR_06080W	SIS1	Putative Type II HSP40 co-chaperone; macrophage/pseudohyphal-repressed; heavy metal (cadmium) stress-induced; heterozygous null mutant displays sensitivity to virgineone; rat catheter biofilm induced	YNL007C	SIS1	type II HSP40 co-chaperone SIS1	Type II HSP40 co-chaperone that interacts with the HSP70 protein Ssa1p; shuttles between cytosol and nucleus; mediates delivery of misfolded proteins into the nucleus for degradation; involved in proteasomal degradation of misfolded cytosolic proteins; protein abundance increases in response to DNA replication stress; polyQ aggregates sequester Sis1p and interfere with clearance of misfolded prot…
	-0.57754433662788	CAGL0G06094g		Ortholog(s) have phosphatase regulator activity, role in mRNA stabilization and cytoplasm, nucleus localization	C3_02920W		Ortholog of S. cerevisiae Igo2; role in mRNA stabilization of mRNA; Spider biofilm induced	YHR132W-A	IGO2	phosphatase regulator	Protein required for initiation of G0 program; prevents degradation of nutrient-regulated mRNAs via the 5'-3' mRNA decay pathway; phosphorylated by Rim15p; GFP protein localizes to the cytoplasm and nucleus; IGO2 has a paralog, IGO1, that arose from the whole genome duplication
	-0.605678746962543	CAGL0C03113g		Ortholog(s) have RNA 7-methylguanosine cap binding, exoribonuclease activator activity, m7G(5')pppN diphosphatase activity	C7_01190W		Ortholog(s) have RNA 7-methylguanosine cap binding, exoribonuclease activator activity, m7G(5')pppN diphosphatase activity	YLR270W	DCS1	5'-(N(7)-methyl 5'-triphosphoguanosine)-(mRNA) diphosphatase|DcpS	Non-essential hydrolase involved in mRNA decapping; activates Xrn1p; may function in a feedback mechanism to regulate deadenylation, contains pyrophosphatase activity and a HIT (histidine triad) motif; acts as inhibitor of neutral trehalase Nth1p; required for growth on glycerol medium; protein abundance increases in response to DNA replication stress; DCS1 has a paralog, DCS2, that arose from th…
	-0.651898784603338	CAGL0J06820g		Ortholog(s) have endoribonuclease activity, role in RNA catabolic process, apoptotic process, cell morphogenesis and cytosol, extracellular region, fungal-type vacuole localization	C5_04400W	RNY11	Ortholog(s) have endoribonuclease activity, role in RNA catabolic process, apoptotic process, cell morphogenesis and cytosol, extracellular region, fungal-type vacuole localization	YPL123C	RNY1	ribonuclease T2	Vacuolar RNase of the T(2) family; relocalizes to the cytosol where it cleaves tRNAs upon oxidative or stationary phase stress; required for tRNA-specific translational pausing suring oxidative stress; promotes apoptosis under stress conditions and this function is independent of Rny1p catalytic activity
	-0.710757168561193	CAGL0H08778g		Ortholog(s) have mRNA binding activity, role in nuclear-transcribed mRNA catabolic process, deadenylation-dependent decay and cytoplasm localization				YPR042C	PUF2		PUF family mRNA-binding protein; Pumilio homology domain confers RNA binding activity; preferentially binds mRNAs encoding membrane-associated proteins; binding site composed of two UAAU tetranucleotides, separated by a 3-nt linker; PUF2 has a paralog, JSN1, that arose from the whole genome duplication
	-0.769476045369535	CAGL0G05830g		Ortholog(s) have DNA binding activity				YHR146W	CRP1		Protein that binds to cruciform DNA structures; CRP1 has a paralog, MDG1, that arose from the whole genome duplication
	-0.779005588944593	CAGL0L04598g		Ortholog(s) have RNA 7-methylguanosine cap binding, m7G(5')pppN diphosphatase activity, role in cellular response to starvation, deadenylation-dependent decapping of nuclear-transcribed mRNA and P-body, cytosol, nucleus localization				YOR173W	DCS2	5'-(N(7)-methyl 5'-triphosphoguanosine)-(mRNA) diphosphatase	m(7)GpppX pyrophosphatase regulator; non-essential, stress induced regulatory protein; modulates m7G-oligoribonucleotide metabolism; inhibits Dcs1p; regulated by Msn2p, Msn4p, and the Ras-cAMP-cAPK signaling pathway; mutant has increased aneuploidy tolerance; DCS2 has a paralog, DCS1, that arose from the whole genome duplication
	-0.779570105139327	CAGL0D00594g		Ortholog(s) have role in negative regulation of transcription from RNA polymerase I promoter and Rpd3L complex, Rpd3L-Expanded complex localization	C2_05370C	RXT3	Putative transcriptional repressor	YDL076C	RXT3		Component of the Rpd3L histone deacetylase complex; involved in histone deacetylation; protein abundance increases in response to DNA replication stress
	-0.854133223489534	CAGL0K06083g		Ortholog(s) have DNA end binding activity, role in double-strand break repair via nonhomologous end joining, double-strand break repair via single-strand annealing and DNA ligase IV complex localization				YLR265C	NEJ1	LIF2	Protein involved in regulation of nonhomologous end joining; interacts with DNA ligase IV components Dnl4p and Lif1p; repressed by MAT heterozygosity; regulates cellular distribution of Lif1p
	-0.856047382675899	CAGL0J06908g		Ortholog(s) have mRNA binding activity, role in translational initiation and cytoplasm localization				YPL119C	DBP1	putative DEAD-box ATP-dependent RNA helicase DBP1|LPH8	Putative ATP-dependent RNA helicase of the DEAD-box protein family; mutants show reduced stability of the 40S ribosomal subunit scanning through 5' untranslated regions of mRNAs; protein abundance increases in response to DNA replication stress; DBP1 has a paralog, DED1, that arose from the whole genome duplication
	-1.5912385167519	CAGL0H02101g		Ortholog(s) have role in RNA metabolic process and biofilm matrix, cytoplasm, nucleus localization	C2_07630C		Possible stress protein; increased transcription associated with CDR1 and CDR2 overexpression or fluphenazine treatment; regulated by Sfu1, Nrg1, Tup1; stationary phase enriched protein; Spider biofilm induced	YHR087W	RTC3	HGI1	Protein of unknown function involved in RNA metabolism; has structural similarity to SBDS, the human protein mutated in Shwachman-Diamond Syndrome (the yeast SBDS ortholog = SDO1); null mutation suppresses cdc13-1 temperature sensitivity; protein abundance increases in response to DNA replication stress
Unknown Function	1.68190277058092	CAGL0M11660g		Has domain(s) with predicted hydrolase activity
	1.64535665376159	CAGL0K01155g		Ortholog of S. cerevisiae : YGR079W and Saccharomyces cerevisiae S288C : YGR079W				YGR079W	YGR079W		Putative protein of unknown function; YGR079W is not an essential gene
	1.56222819455524	CAGL0G04763g		Has domain(s) with predicted role in termination of G-protein coupled receptor signaling pathway
	1.42666123299253	CAGL0E05456g		Ortholog(s) have role in ascospore formation, positive regulation of transcription from RNA polymerase II promoter	C2_09880C		Putative protein of unknown function; Plc1-regulated; transcript induced by Mnl1 under weak acid stress; flow model, rat catheter, Spider biofilm induced	YOR338W	YOR338W		Putative protein of unknown function; YOR338W transcription is regulated by Azf1p and its transcript is a specific target of the G protein effector Scp160p; identified as being required for sporulation in a high-throughput mutant screen; YOR338W has a paralog, FUN19, that arose from the whole genome duplication
	1.2585404138545	CAGL0E04554g		Putative protein; gene is upregulated in azole-resistant strain
	0.995538586710828	CAGL0E06292g		Has domain(s) with predicted GTP binding, GTPase activity, role in protein transport, signal transduction, small GTPase mediated signal transduction and intracellular, membrane localization
	0.974732655971917	CAGL0J11792g		Protein of unknown function
	0.932527760443199	CAGL0B04433g		Ortholog(s) have cytosol, nucleus localization
	0.925682340735146	CAGL0J11088g		Protein of unknown function
	0.840895195467598	CAGL0F01177g		Ortholog of S. cerevisiae : YOL036W and Saccharomyces cerevisiae S288C : YOL036W				YOL036W	YOL036W		Protein of unknown function; potential Cdc28p substrate; YOL036W has a paralog, YIR016W, that arose from the whole genome duplication
	0.807588286033955	CAGL0G04499g		Ortholog of S. cerevisiae : SET4 and Saccharomyces cerevisiae S288C : YJL105W				YJL105W	SET4		Protein of unknown function, contains a SET domain; SET4 has a paralog, SET3, that arose from the whole genome duplication
	0.779571095254571	CAGL0G07018g		Ortholog(s) have Golgi apparatus, fungal-type vacuole membrane localization	C3_06420C		Ortholog(s) have Golgi apparatus, fungal-type vacuole membrane localization	YML018C	YML018C		Protein of unknown function; green fluorescent protein (GFP)-fusion protein localizes to the membrane of the vacuole; physical interaction with Atg27p suggests a possible role in autophagy; YML018C is not an essential gene; relative distribution to the vacuolar membrane decreases upon DNA replication stress; YML018C has a paralog, THI74, that arose from the whole genome duplication
	0.778660669236302	CAGL0I10670g		Protein of unknown function
	0.75155139435187	CAGL0H05247g		Ortholog(s) have nucleus localization				YPL068C	YPL068C		Protein of unknown function; green fluorescent protein (GFP)-fusion protein localizes to the nucleus and is induced in response to the DNA-damaging agent MMS
	0.744282704654465	CAGL0D00374g		Protein of unknown function
	0.743419843799201	CAGL0H00143g		Protein of unknown function
	0.72093402511567	CAGL0G00484g		Ortholog(s) have nucleolus localization
	0.720430562423852	CAGL0I06226g		Ortholog(s) have cytoplasm, nucleus localization	C1_09280W		Ortholog(s) have cytoplasm, nucleus localization	YJL162C	JJJ2		Protein of unknown function; contains a J-domain, which is a region with homology to the E. coli DnaJ protein
	0.719669034451782	CAGL0D03124g		Ortholog(s) have nucleolus localization
	0.716329041857353	CAGL0K02387g		Ortholog(s) have cytosol localization
	0.714259956404127	CAGL0C04785g		Ortholog of S. cerevisiae : YJR115W and Saccharomyces cerevisiae S288C : YJR115W				YJR115W	YJR115W		Putative protein of unknown function; YJR115W has a paralog, ECM13, that arose from the whole genome duplication
	0.712676215774238	CAGL0K12804g		Ortholog(s) have nucleolus localization
	0.70393264357821	CAGL0M06809g		Ortholog(s) have cytosol, nucleus localization
	0.701220941145439	CAGL0K11319g		Ortholog of S. cerevisiae : YDR249C and Saccharomyces cerevisiae S288C : YDR249C				YDR249C	YDR249C		Putative protein of unknown function
	0.695898657116227	CAGL0G08778g		Ortholog(s) have nucleolus localization	C3_01430W		Protein of unknown function; Spider biofilm induced	YIL127C	RRT14		Putative protein of unknown function; identified in a screen for mutants with decreased levels of rDNA transcription; green fluorescent protein (GFP)-fusion protein localizes to the nucleolus; predicted to be involved in ribosome biogenesis
	0.680402426901344	CAGL0A03608g		Protein of unknown function
	0.673757445480131	CAGL0J10912g		Ortholog(s) have cytosol, nucleus localization
	0.669679753103148	CAGL0F06523g		Ortholog(s) have nucleolus localization
	0.666137545224483	CAGL0H02299g		Ortholog(s) have nucleus localization				YMR265C	YMR265C		Putative protein of unknown function
	0.665739797805163	CAGL0H01947g		Ortholog(s) have cytoplasm, nucleus localization	CR_03980W		Protein of unknown function; rat catheter and Spider biofilm induced	YJR056C	YJR056C		Protein of unknown function; green fluorescent protein (GFP)-fusion protein localizes to both the cytoplasm and the nucleus; relative distribution to the nucleus increases upon DNA replication stress
	0.635285794607334	CAGL0G08954g		Ortholog(s) have fungal-type vacuole, plasma membrane localization	C2_01980C	SRD1	Sur7 family protein with PalI-like domains; not required for stress responses; mutant is viable	YOL019W	YOL019W	TOS7	Protein of unknown function; green fluorescent protein (GFP)-fusion protein localizes to the cell periphery and vacuole; YOL019W has a paralog, DCV1, that arose from the whole genome duplication
	0.634268120605867	CAGL0F00715g		Protein of unknown function
	0.631728500691629	CAGL0K09152g		Ortholog(s) have role in vacuolar protein processing, vacuole organization and lipid particle, mitochondrion localization	C2_04330C		S. cerevisiae ortholog Env9 has similarity to oxidoreductases and is proposed to have vacuolar functions, found in lipid particles; hyphal-induced expression	YOR246C	ENV9		Protein proposed to be involved in vacuolar functions; mutant shows defect in CPY processing and defects in vacuolar morphology; has similarity to oxidoreductases, found in lipid particles; required for replication of Brome mosaic virus in S. cerevisiae, a model system for studying replication of positive-strand RNA viruses in their natural hosts
	0.631074825274206	CAGL0L07832g		Ortholog(s) have nucleolus localization	C3_07600W		Ortholog(s) have nucleolus localization	YCR016W	YCR016W		Putative protein of unknown function; green fluorescent protein (GFP)-fusion protein localizes to the nucleolus and nucleus; predicted to be involved in ribosome biogenesis
	0.623954203281838	CAGL0L04950g		Ortholog(s) have nucleolus localization
	0.618417937162894	CAGL0J01595g	GLM6	Gene used for molecular typing of C. glabrata strain isolates
	0.609424462494805	CAGL0L05016g		Ortholog of S. cerevisiae : STB6, C. albicans SC5314 : C3_03150W_A, C. dubliniensis CD36 : Cd36_83110, C. parapsilosis CDC317 : CPAR2_103210 and Candida tenuis NRRL Y-1498 : CANTEDRAFT_133418	C3_03150W		Ortholog of S. cerevisiae : STB6, C. glabrata CBS138 : CAGL0L05016g, C. dubliniensis CD36 : Cd36_83110, C. parapsilosis CDC317 : CPAR2_103210 and Candida tenuis NRRL Y-1498 : CANTEDRAFT_133418	YKL072W	STB6		Protein that binds Sin3p in a two-hybrid assay; STB6 has a paralog, STB2, that arose from the whole genome duplication
	0.608541807307953	CAGL0M12001g		Protein of unknown function
	0.589859310948296	CAGL0I09196g		Ortholog of S. cerevisiae : YBR259W and Saccharomyces cerevisiae S288C : YBR259W				YBR259W	YBR259W		Protein of unknown function; YBR259W is not an essential gene; forms cytoplasmic foci upon DNA replication stress
	0.583655623001054	CAGL0G01991g		Protein of unknown function
	0.580878844549454	CAGL0M13915g		Ortholog(s) have role in cell-abiotic substrate adhesion and cytosol, nucleus localization	C4_02260C		Protein of unknown function; repressed by prostaglandins; Hap43-induced, Spider biofilm induced	YMR310C	YMR310C	putative methyltransferase	Putative methyltransferase; predicted to be involved in ribosome biogenesis; green fluorescent protein (GFP)-fusion protein localizes to the nucleus; not an essential gene; YMR310C has a paralog, YGR283C, that arose from the whole genome duplication
	0.568113075937437	CAGL0M02805g		Protein of unknown function
	0.567749780698395	CAGL0H08349g		Ortholog(s) have cytosol localization
	0.563905070877027	CAGL0F05115g		Ortholog(s) have fungal-type vacuole, plasma membrane localization				YLR413W	INA1		Protein of unknown function; not an essential gene; YLR413W has a paralog, FAT3, that arose from the whole genome duplication
	0.538594758986031	CAGL0E05522g		Ortholog(s) have cytoplasm, nucleus localization				YOR342C	YOR342C		Protein of unknown function; green fluorescent protein (GFP)-fusion protein localizes to the cytoplasm and the nucleus; relocalizes from nucleus to cytoplasm upon DNA replication stress; YOR342C has a paralog, YAL037W, that arose from the whole genome duplication
	0.512235640620905	CAGL0K07898g		Ortholog of S. cerevisiae : YPR084W, C. albicans SC5314 : CR_05760C_A, C. dubliniensis CD36 : Cd36_31160, C. parapsilosis CDC317 : CPAR2_702430 and Candida tenuis NRRL Y-1498 : CANTEDRAFT_112957	CR_05760C		Protein of unknown function; rat catheter biofilm repressed	YPR084W	YPR084W		Putative protein of unknown function
	0.505476436242649	CAGL0L02563g		Ortholog(s) have fungal-type vacuole, nucleus localization				YIL158W	AIM20		Protein of unknown function; overexpression causes cell cycle delay or arrest; green fluorescent protein (GFP)-fusion protein localizes to vacuole; null mutant displays elevated frequency of mitochondrial genome loss; relocalizes from nucleus to cytoplasm upon DNA replication stress; AIM20 has a paralog, SKG1, that arose from the whole genome duplication
	0.502741985948086	CAGL0C02673g		Ortholog(s) have cytoplasm localization	C7_02630W		Protein of unknown function; mutants are viable; ortholog of S. cervisiae Art10, a protein of unknown function	YLR392C	ART10		Protein of unknown function that contains 2 PY motifs; ubiquinated by Rsp5p; overexpression confers resistance to arsenite; green fluorescent protein (GFP)-fusion protein localizes it to the cytoplasm; non-essential gene
	0.50224535933035	CAGL0L11638g		Ortholog(s) have nucleolus localization
	-0.501570965602272	CAGL0A02255g		Protein of unknown function
	-0.504253288473011	CAGL0H00704g		Ortholog(s) have role in CVT pathway, autophagosome assembly, mitophagy				YPL250C	ICY2	ICY2	Protein of unknown function; required for selective and nonselective autophagy, and mitophagy; regulates the rate of autophagosome formation; interacts with Atg9p, and has a similar peri-mitochondrial localization; elevated Gcn4p-dependent expression under autophagy-inducing conditions; mobilized into polysomes upon a shift from a fermentable to nonfermentable carbon source; potential Cdc28p subs…
	-0.513529902399645	CAGL0I07557g		Ortholog(s) have cytosol, nucleus localization
	-0.524269402674695	CAGL0L06864g		Putative protein related to ECM3; gene is downregulated in azole-resistant strain
	-0.525333985781802	CAGL0L11616g		Ortholog(s) have cytoplasm localization				YOR118W	RTC5		Protein of unknown function; green fluorescent protein (GFP)-fusion protein localizes to the cytoplasm; null mutation suppresses cdc13-1 temperature sensitivity
	-0.533263465630959	CAGL0I06424g		Ortholog(s) have cytosol, nucleus localization				YPR172W	YPR172W	pyridoxal 5'-phosphate synthase	Protein of unknown function; predicted to encode a pyridoxal 5'-phosphate synthase based on sequence similarity but purified protein does not possess this activity, nor does it bind flavin mononucleotide (FMN); transcriptionally activated by Yrm1p along with genes involved in multidrug resistance; YPR172W has a paralog, YLR456W, that arose from the whole genome duplication
	-0.544651692907564	CAGL0C01793g		Protein of unknown function
	-0.559808506193909	CAGL0A02277g		Protein of unknown function
	-0.559850599626998	CAGL0I01276g		Ortholog(s) have cytoplasm, nucleus localization	CR_09010C		Putative cystathionine gamma-synthase; decreased levels in stationary phase cultures; Hog1p-induced; Gcn4p-regulated	YHR112C	YHR112C	putative cystathionine beta-lyase	Protein of unknown function; localizes to the cytoplasm and nucleus; overexpression affects protein trafficking through the endocytic pathway
	-0.560341934141376	CAGL0J00187g		Ortholog(s) have cell periphery, endoplasmic reticulum localization	CR_06170W		Protein of unknown function; oral infection induced; mutants have reduced capacity to damage oral epithelial cells; rat catheter biofilm repressed	YGR026W	YGR026W		Putative protein of unknown function; green fluorescent protein (GFP)-fusion protein localizes to the cell periphery
	-0.567213443466014	CAGL0K04279g	SCM4	Ortholog(s) have mitochondrial outer membrane localization				YGR049W	SCM4		Mitochondrial outer membrane protein of unknown function; predicted to have 4 transmembrane segments; import is mediated by Tom70p and Mim1p; interacts genetically with a cdc4 mutation; SCM4 has a paralog, ATG33, that arose from the whole genome duplication
	-0.568816496492076	CAGL0M13255g		Ortholog(s) have endoplasmic reticulum, ribosome localization				YKL065C	YET1		Endoplasmic reticulum transmembrane protein; may interact with ribosomes, based on co-purification experiments; homolog of human BAP31 protein; YET1 has a paralog, YET2, that arose from the whole genome duplication
	-0.578171058628738	CAGL0J06270g		Ortholog of S. cerevisiae : YDL176W and Saccharomyces cerevisiae S288C : YDL176W				YDL176W	YDL176W		Protein of unknown function; predicted by computational methods to be involved in fructose-1,6-bisphosphatase (Fbp1p) degradation; interacts with components of the GID complex; YDL176W is not an essential gene
	-0.585757975752758	CAGL0C00451g		Ortholog(s) have cytosol, nucleus localization
	-0.596722011980407	CAGL0K00341g		Protein of unknown function
	-0.604858653700357	CAGL0M05995g		Ortholog(s) have lipid particle localization				YKR046C	PET10		Protein of unknown function that localizes to lipid particles; localization suggests a role in lipid metabolism; expression pattern suggests a role in respiratory growth; computational analysis of large-scale protein-protein interaction data suggests a role in ATP/ADP exchange
	-0.607277165265674	CAGL0I08987g		Ortholog(s) have cytosol localization
	-0.610911069450519	CAGL0H00781g		Ortholog(s) have Golgi apparatus, cytosol, nucleus localization	C1_08390C		Ortholog(s) have Golgi apparatus, cytosol, nucleus localization	YPL247C	YPL247C		Putative protein of unknown function; green fluorescent protein (GFP)-fusion protein localizes to the cytoplasm and nucleus; similar to the petunia WD repeat protein an11; overexpression causes a cell cycle delay or arrest
	-0.622027534698781	CAGL0D00990g		Ortholog of S. cerevisiae : YDL057W, C. albicans SC5314 : C5_00750C_A, C. dubliniensis CD36 : Cd36_50730, C. parapsilosis CDC317 : CPAR2_501760 and Candida tenuis NRRL Y-1498 : CANTEDRAFT_127559	C5_00750C		Predicted protein tyrosine phosphatase; rat catheter biofilm induced	YDL057W	YDL057W		Putative protein of unknown function; YDL057W is not an essential gene
	-0.622768946890336	CAGL0K02629g		Ortholog(s) have intracellular localization
	-0.623221596885439	CAGL0K05665g		Has domain(s) with predicted catalytic activity, pyridoxal phosphate binding activity
	-0.62716555170596	CAGL0A02299g		Protein of unknown function
	-0.630783494760665	CAGL0I02046g		Protein of unknown function
	-0.638485074673284	CAGL0G05962g		Ortholog(s) have endoplasmic reticulum localization	C5_00140C		Putative integral membrane protein of unknown function; clade-associated gene expression; Spider biofilm induced	YHR140W	YHR140W		Putative integral membrane protein of unknown function
	-0.640239348377192	CAGL0E06512g		Ortholog(s) have cytoplasm localization	C4_04430W	MRP8	Mitochondrial ribosomal protein; ortholog of S. cerevisiae Mrp8; transcript induced in hyphal form; mutant is viable; flow model and rat catheter biofilm repressed	YKL142W	MRP8	YKL3	Protein of unknown function; undergoes sumoylation; transcription induced under cell wall stress; protein levels are reduced under anaerobic conditions; protein abundance increases in response to DNA replication stress; originally thought to be a mitochondrial ribosomal protein based on sequence analysis
	-0.640988069586365	CAGL0J05808g		Ortholog(s) have endoplasmic reticulum localization				YNL146W	YNL146W		Putative protein of unknown function; green fluorescent protein (GFP)-fusion protein localizes to the endoplasmic reticulum; YNL146W is not an essential gene
	-0.648262400947995	CAGL0H03289g		Ortholog(s) have cytoplasm, nucleus, plasma membrane localization				YGL082W	YGL082W		Putative protein of unknown function; predicted prenylation/proteolysis target of Afc1p and Rce1p; green fluorescent protein (GFP)-fusion protein localizes to the cytoplasm and nucleus; not an essential gene; YGL082W has a paralog, YPL191C, that arose from the whole genome duplication
	-0.653967252855877	CAGL0G03531g		Ortholog(s) have mitochondrion localization				YER115C	SPR6		Protein of unknown function; expressed during sporulation; not required for sporulation, but gene exhibits genetic interactions with other genes required for sporulation
	-0.661754626580068	CAGL0F04521g		Ortholog of S. cerevisiae : ECM13 and Saccharomyces cerevisiae S288C : YBL043W				YBL043W	ECM13		Non-essential protein of unknown function; induced by treatment with 8-methoxypsoralen and UVA irradiation; ECM13 has a paralog, YJR115W, that arose from the whole genome duplication
	-0.67099763268107	CAGL0K04631g		Ortholog(s) have sequence-specific DNA binding activity	C6_01500C	TRY5	Zn(II)2Cys6 transcription factor; regulator of yeast form adherence; required for yeast cell adherence to silicone substrate	YGR067C	YGR067C		Putative protein of unknown function; contains a zinc finger motif similar to that of Adr1p
	-0.676244747226237	CAGL0K05687g		Ortholog(s) have cytosol, nucleus localization
	-0.678747009750999	CAGL0G04829g		Protein of unknown function
	-0.698013684731129	CAGL0L10582g		Ortholog(s) have cytoplasm localization	C3_03410C		Putative glycoside hydrolase; stationary phase enriched protein; Hog1p-downregulated; shows colony morphology-related gene regulation by Ssn6p	YMR196W	YMR196W		Putative protein of unknown function; green fluorescent protein (GFP)-fusion protein localizes to the cytoplasm; YMR196W is not an essential gene
	-0.705399053264492	CAGL0F07975g		Ortholog(s) have cytoplasm localization	C5_04960W		Protein of unknown function; induced in core caspofungin response; induced in ssr1 mutant; induced by nitric oxide independent of Yhb1; Spider biofilm induced	YGR237C	YGR237C		Putative protein of unknown function; green fluorescent protein (GFP)-fusion protein localizes to the cytoplasm
	-0.711905635972937	CAGL0B01078g		Putative protein; gene is upregulated in azole-resistant strain				YLR177W	YLR177W		Putative protein of unknown function; phosphorylated by Dbf2p-Mob1p in vitro; some strains contain microsatellite polymophisms at this locus; not an essential gene; YLR177W has a paralog, PSP1, that arose from the whole genome duplication
	-0.775406689007336	CAGL0B03817g		Ortholog(s) have cytosol, nucleus localization	C1_14030W		Protein of unknown function; Spider biofilm induced	YJR008W	MHO1		Protein of unknown function; inhibits haploid invasive growth when overexpressed; synthetically lethal with phospholipase C (PLC1); expression induced by mild heat-stress on a non-fermentable carbon source, upon entry into stationary phase and upon nitrogen deprivation; repressed by inosine and choline in an Opi1p-dependent manner; highly conserved from bacteria to human; Memo, the human homolog,…
	-0.780836932270149	CAGL0K09218g		Ortholog(s) have role in regulation of cell size and endoplasmic reticulum localization	C1_10360C		Putative protein of unknown function; Hap43p-repressed gene; increased transcription is observed upon fluphenazine treatment; possibly transcriptionally regulated by Tac1p; induced by nitric oxide; fungal-specific (no human/murine homolog	YCR061W	YCR061W	YCR062W	Protein of unknown function; green fluorescent protein (GFP)-fusion protein localizes to the cytoplasm in a punctate pattern; induced by treatment with 8-methoxypsoralen and UVA irradiation
	-0.792353213019067	CAGL0K08734g		Ortholog(s) have endoplasmic reticulum, fungal-type vacuole localization				YIR014W	YIR014W		Putative protein of unknown function; green fluorescent protein (GFP)-fusion protein localizes to the vacuole; expression directly regulated by the metabolic and meiotic transcriptional regulator Ume6p; YIR014W is a non-essential gene
	-0.807885926914413	CAGL0G05357g		Ortholog(s) have cytosol, nucleus localization
	-0.822075760984715	CAGL0L06512g		Ortholog(s) have role in meiotic nuclear division				YGR230W	BNS1		Protein of unknown function; overexpression bypasses need for Spo12p, but not required for meiosis; BNS1 has a paralog, SPO12, that arose from the whole genome duplication
	-0.84644553084032	CAGL0L00957g		Protein of unknown function
	-0.858593390613277	CAGL0J08976g		Protein of unknown function
	-0.872167512612978	CAGL0C01749g		Ortholog(s) have cytosol, nucleus localization				YBR242W	YBR242W		Putative protein of unknown function; green fluorescent protein (GFP)-fusion protein localizes to the cytoplasm and nucleus; YBR242W is not an essential gene; YBR242W has a paralog, YGL101W, that arose from the whole genome duplication
	-0.874362949261172	CAGL0B03201g		Ortholog(s) have nucleus localization				YKR011C	YKR011C	TOS5	Protein of unknown function; green fluorescent protein (GFP)-fusion protein localizes to the nucleus; protein abundance increases in response to DNA replication stress
	-0.894904179278989	CAGL0E06380g		Ortholog(s) have ATP-dependent NAD(P)H-hydrate dehydratase activity, role in nicotinamide nucleotide metabolic process and cytosol localization	C6_02030C		Putative protein of unknown function; stationary phase enriched protein	YKL151C	YKL151C	NADHX dehydratase	Widely-conserved NADHX dehydratase; converts (S)-NADHX to NADH in ATP-dependent manner; YKL151C promoter contains STREs (stress response elements) and expression is induced by heat shock or methyl methanesulfonate; downstream intergenic region drives antisense expression and mediates coordinated regulation of YKL151C and GPM1 phosphoglycerate mutase; protein abundance increases in response to DNA…
	-0.904057875238933	CAGL0G02849g		Ortholog(s) have endoplasmic reticulum, mitochondrial outer membrane, nuclear envelope localization				YPL186C	UIP4		Protein that interacts with Ulp1p; a Ubl (ubiquitin-like protein)-specific protease for Smt3p protein conjugates; detected in a phosphorylated state in the mitochondrial outer membrane; also detected in ER and nuclear envelope
	-0.992134661216671	CAGL0F04697g		Ortholog(s) have cytoplasm localization				YLR257W	YLR257W		Protein of unknown function; protein abundance increases in response to DNA replication stress
	-1.02124938005159	CAGL0K07205g		Protein of unknown function
	-1.0379475365838	CAGL0A02002g		Ortholog of S. cerevisiae : YOL024W and Saccharomyces cerevisiae S288C : YOL024W				YOL024W	YOL024W		Putative protein of unknown function; predicted to have thiol-disulfide oxidoreductase active site; YOL024W has a paralog, IGD1, that arose from the whole genome duplication
	-1.05889687403322	CAGL0F00132g		Protein of unknown function
	-1.13501852606626	CAGL0B01595g		Protein of unknown function
	-1.14571188690886	CAGL0K07678g		Protein of unknown function
	-1.20429041674924	CAGL0C04587g		Ortholog(s) have mitochondrion localization				YJR098C	YJR098C		Putative protein of unknown function; the authentic, non-tagged protein is detected in highly purified mitochondria in high-throughput studies
	-1.26505148451232	CAGL0G05632g		Ortholog(s) have cytoplasm localization	C5_04190W	MRV2	Protein of unknown function; repressed by fluphenazine treatment or in an azole-resistant strain that overexpresses CDR1 and CDR2; Spider biofilm induced	YDL218W	YDL218W		Putative protein of unknown function; YDL218W transcription is regulated by Azf1p and induced by starvation and aerobic conditions; expression also induced in cells treated with the mycotoxin patulin
	-1.30985449454885	CAGL0M14025g		Ortholog(s) have nucleus localization
	-1.34989844818387	CAGL0H02563g		Predicted GPI-linked protein				YMR251W-A	HOR7		Protein of unknown function; overexpression suppresses Ca2+ sensitivity of mutants lacking inositol phosphorylceramide mannosyltransferases Csg1p and Csh1p; transcription is induced under hyperosmotic stress and repressed by alpha factor; HOR7 has a paralog, DDR2, that arose from the whole genome duplication
	-1.68666631296502	CAGL0L13288g		Protein of unknown function
	-1.84539783166307	CAGL0M11000g		Ortholog(s) have cytosol localization				YNR034W-A	YNR034W-A		Protein of unknown function; expression is regulated by Msn2p/Msn4p; YNR034W-A has a paralog, YCR075W-A, that arose from the whole genome duplication
