# Supplementary material for: Characterization of the Candida glabrata Transcription Factor CgMar1: Role in Azole Susceptibility
Source: J Fungi (Basel). 2022 Jan 7;8(1):61. doi: 10.3390/jof8010061 (PMC8779156; doi:10.3390/jof8010061)
Supplement: Supplementary file 1 [file jof-08-00061-s001.zip › Table_S3.xlsx]

## Sheet: Table S3
Supplementary Table S3 - Differentially expressed genes in ∆cgmar1 FLC/WT FLC. Green indicates upregulated genes (CgMar1-repressed), red indicates downregulated genes (CgMar1-activated)
Functional Group	Log2 Fold Change	ORF	Name	Function	C. albicans homolog ORF	C. albicans homolog name	C. albicans function	S. cerevisiae homolog ORF	S. cerevisiae homolog name	S. cerevisiae definition	S. cerevisiae function
Drug Resistance	1.10569548459441	CAGL0L10912g		Ortholog(s) have spermidine transmembrane transporter activity, spermine transmembrane transporter activity, role in spermidine transport, spermine transport and fungal-type vacuole membrane, plasma membrane localization	CR_03920C	TPO4	Putative sperimidine transporter; fungal-specific (no human or murine homolog); Spider biofilm induced; promoter bound by Tec1 and Ndt80; Bcr1-repressed in RPMI a/a biofilms	YOR273C	TPO4		Polyamine transporter of the major facilitator superfamily; member of the 12-spanner drug:H(+) antiporter DHA1 family; recognizes spermine, putrescine, and spermidine; localizes to the plasma membrane
	0.660085558797733	CAGL0G00242g	YOR1	Putative ABC transporter involved in multidrug efflux; gene is upregulated in azole-resistant strain	C2_09990C	YOR1	Protein similar to S. cerevisiae Yor1; ABC-type plasma membrane transporter involved in resistance to aureobasidin A; white cell type-specific transcript; Spider biofilm induced	YGR281W	YOR1	ATP-binding cassette transporter YOR1|YRS1	Plasma membrane ATP-binding cassette (ABC) transporter; multidrug transporter mediates export of many different organic anions including oligomycin; homolog of human cystic fibrosis transmembrane receptor (CFTR)
	0.569002029081748	CAGL0G03927g	TPO1_1	Putative drug:H+ antiporter, involved in efflux of clotrimazole; required for resistance to clotrimazole and other drugs	C7_01520W	FLU1	Multidrug efflux pump of the plasma membrane; MDR family member of the MFS (major facilitator superfamily) of transporters; involved in histatin 5 efflux; fungal-specific (no human/murine homolog)	YLL028W	TPO1		Polyamine transporter of the major facilitator superfamily; member of the 12-spanner drug:H(+) antiporter DHA1 family; recognizes spermine, putrescine, and spermidine; catalyzes uptake of polyamines at alkaline pH and excretion at acidic pH; during oxidative stress exports spermine, spermidine from the cell, which controls timing of expression of stress-responsive genes; phosphorylation enhances …
Lipid and Fatty Acid Metabolism	0.698238213298243	CAGL0A03740g		Ortholog(s) have role in fatty acid beta-oxidation, long-chain fatty acid catabolic process and peroxisome localization
	0.591483906209542	CAGL0K09570g		Ortholog(s) have diacylglycerol cholinephosphotransferase activity, role in CDP-choline pathway and Golgi apparatus, endoplasmic reticulum, mitochondrial outer membrane localization				YNL130C	CPT1	diacylglycerol cholinephosphotransferase	Cholinephosphotransferase; required for phosphatidylcholine biosynthesis and for inositol-dependent regulation of EPT1 transcription; CPT1 has a paralog, EPT1, that arose from the whole genome duplication
	0.588552736377283	CAGL0I04752g		Ortholog(s) have phosphatidate cytidylyltransferase activity	C5_04100W	CDS1	Protein similar to S. cerevisiae Cds1p; transposon mutation affects filamentous growth	YBR029C	CDS1	phosphatidate cytidylyltransferase|CDG1	Phosphatidate cytidylyltransferase (CDP-diglyceride synthetase); an enzyme that catalyzes that conversion of CTP + phosphate into diphosphate + CDP-diaclglyerol, a critical step in the synthesis of all major yeast phospholipids; human homolog CDS1 can complement yeast cds1 null mutant
	0.55045142221317	CAGL0D03960g		Ortholog(s) have role in lipid homeostasis, mRNA export from nucleus, nuclear envelope organization and endoplasmic reticulum, integral component of membrane, nuclear envelope localization	CR_03930C		Ortholog(s) have role in lipid homeostasis, mRNA export from nucleus, nuclear envelope organization and endoplasmic reticulum, integral component of membrane, nuclear envelope localization	YHR036W	BRL1		Essential nuclear envelope/ER integral membrane protein; interacts and functions with Apq12p and Brr6p in lipid homeostasis; mutants are defective in nuclear pore complex biogenesis, mRNA nuclear export and are sensitive to sterol biosynthesis inhibitors and membrane fluidizing agents; identified as a dosage suppressor of a temperature sensitive mutation in the major karyopherin, CRM1; homologous…
	-0.509114531160351	CAGL0L10142g	RSB1	Putative sphingolipid flippase; gene is upregulated in azole-resistant strain	C2_06470W	RTA2	Flippase involved in sphingolipid long chain base release; mediates calcineurin-dependent ER stress response and resistance to azoles; Plc1p, Ca2+, calcineurin-regulated;	YOR049C	RSB1	phospholipid-translocating ATPase RSB1	Putative sphingoid long-chain base (LCB) efflux transporter; integral membrane transporter that localizes to the plasma membrane and may transport long chain bases (LCBs) from the cytoplasmic side toward the extracytoplasmic side of the membrane; role in glycerophospholipid translocation; suppressor of the sphingoid LCB sensitivity of an LCB-lyase mutation
	-0.54483263378578	CAGL0I08305g		Ortholog(s) have carnitine O-acetyltransferase activity	C3_04000C	CTN3	Peroxisomal carnitine acetyl transferase; no obvious metabolic, hyphal, virulence defects in Ura+ strain; induced by macrophage engulfment, hyphal growth, starvation, nonfermentable carbon sources; rat catheter, Spider biofilm induced	YER024W	YAT2	carnitine O-acetyltransferase YAT2	Carnitine acetyltransferase; has similarity to Yat1p, which is a carnitine acetyltransferase associated with the mitochondrial outer membrane
	-0.551644146683033	CAGL0B00990g	HBN1	Ortholog(s) have oxidoreductase activity, acting on NAD(P)H, nitrogenous group as acceptor activity and role in cellular response to oxidative stress, negative regulation of fatty acid metabolic process				YCL026C-A	FRM2	type II nitroreductase|YCLX08C	Type II nitroreductase, using NADH as reductant; mutants are defective in fatty acid mediated repression of genes involved in fatty acid biosynthesis indicative of a role in lipid signaling; involved in the oxidative stress response; transcription induction by cadmium and selenite indicates a possible role in the metal stress response; expression induced in cells treated with the mycotoxin patulin
	-0.579070053538064	CAGL0L11154g		Ortholog(s) have lysophospholipase activity, role in phosphatidylcholine catabolic process, regulation of phospholipid biosynthetic process and endoplasmic reticulum localization	CR_08300C		Putative patatin-like phospholipase; similar to S. cerevisiae Nte1p, which is predicted to be a membrane protein; antigenic during human oral infection; Hap43p-repressed gene	YML059C	NTE1	lysophospholipase	Serine esterase; homolog of human neuropathy target esterase (NTE); Nte1p-mediated phosphatidylcholine turnover influences transcription factor Opi1p localization, affecting transcriptional regulation of phospholipid biosynthesis genes
	-0.642278478672914	CAGL0K12760g		Ortholog(s) have ER-mitochondrion membrane contact site, endoplasmic reticulum, nucleus-vacuole junction localization				YFL042C	YFL042C	LTC2|YFL043C	Putative sterol transfer protein; one of six StART-like domain-containing proteins in yeast that may be involved in sterol transfer between intracellular membranes; conserved across eukaryotes; has both GRAM and StART-like (VASt) domains; localizes to membrane contact sites throughout the cell, including nucleus-vacuole junctions and ER-mitochondrial contact sites
	-0.647399122762615	CAGL0L13134g		Ortholog(s) have sterol transporter activity, role in intracellular sterol transport and ER-mitochondrion membrane contact site, mitochondrion, nucleus-vacuole junction, vacuole-mitochondrion membrane contact site localization				YLR072W	YLR072W	LTC1	Sterol transporter that transfers sterols between membranes; may regulate and coordinate formation of contact sites between organelles; localizes to ER-mitochondrial contact sites in a Tom70p- and Tom71p-dependent manner; mitochondrial localization requires GRAM domain; also localizes to ER-vacuole contact sites, in a Vac8p-dependent manner; has GRAM and StART-like (VASt) domains; one of six StAR…
	-0.656279800445992	CAGL0I01980g		Putative activator of transcription; gene is upregulated in azole-resistant strain				YHR155W	YSP1	YSP1	Putative sterol transfer protein; localizes to puncta in the cortical ER; probable role in retrograde transport of sterols from the plasma membrane to the ER; one of six StART-like domain-containing proteins in yeast that may be involved in sterol transfer between intracellular membranes; conserved across eukaryotes; contains GRAM, StART-like (VASt) and two PH-like domains
	-0.744577765340608	CAGL0F01111g		Ortholog(s) have role in inositol metabolic process and cytosol, nuclear envelope localization	CR_08330W		Ortholog(s) have role in inositol metabolic process and cytosol, nuclear envelope localization	YOL032W	OPI10		Protein with a possible role in phospholipid biosynthesis; null mutant displays an inositol-excreting phenotype that is suppressed by exogenous choline; protein abundance increases in response to DNA replication stress
	-0.779261433757688	CAGL0M06347g		Ortholog(s) have phytoceramidase activity, sphingosine N-acyltransferase activity, role in ceramide biosynthetic process, ceramide catabolic process and cortical endoplasmic reticulum localization				YBR183W	YPC1	phytoceramidase	Alkaline ceramidase; also has reverse (CoA-independent) ceramide synthase activity; catalyzes both breakdown and synthesis of phytoceramide; overexpression confers fumonisin B1 resistance; YPC1 has a paralog, YDC1, that arose from the whole genome duplication
Nitrogen Metabolism	0.792300056612679	CAGL0F06809g		Ortholog(s) have protein tyrosine phosphatase activity	CR_03570C	YVH1	Putative dual specificity phosphatase (phosphoserine/threonine and phosphotyrosine phosphatase); required for wild-type growth rate and for wild-type virulence in mouse model of systemic infection; Hap43p-induced gene	YIR026C	YVH1	tyrosine protein phosphatase YVH1	Dual specificity protein phosphatase; regulates growth, sporulation, and glycogen accumulation in a cAMP-dependent protein kinase cascade dependent manner; mutants are defective in 60S ribosome assembly; positively regulates pre-autophagosomal structure (PAS) formation upon nitrogen starvation or rapamycin treatment
	0.667975943462137	CAGL0G02453g		Ortholog(s) have dipeptide transmembrane transporter activity, tripeptide transporter activity and role in dipeptide transmembrane transport, tripeptide transport	C3_03800W	PTR22	Oligopeptide transporter involved in uptake of di-/tripeptides; regulated by Stp2 and Stp3; transcript induced upon phagocytosis by macrophage; repressed by Rim101 at pH 8; flow model biofilm induced	YKR093W	PTR2		Integral membrane peptide transporter; mediates transport of di- and tri-peptides; conserved protein that contains 12 transmembrane domains; PTR2 expression is regulated by the N-end rule pathway via repression by Cup9p
	0.634322113481173	CAGL0J08162g		Ortholog(s) have basic amino acid transmembrane transporter activity, role in basic amino acid transport and mitochondrion localization				YNL268W	LYP1	lysine permease	Lysine permease; one of three amino acid permeases (Alp1p, Can1p, Lyp1p) responsible for uptake of cationic amino acids
	0.618616356311587	CAGL0G07106g	APT1	Putative adenine phosphoribosyltransferase; protein abundance decreased in ace2 mutant cells	C2_01430W	APT1	Adenine phosphoribosyltransferase; flucytosine induced; repressed by nitric oxide; protein level decreased in stationary phase yeast cultures	YML022W	APT1	adenine phosphoribosyltransferase APT1	Adenine phosphoribosyltransferase; catalyzes the formation of AMP from adenine and 5-phosphoribosylpyrophosphate; involved in the salvage pathway of purine nucleotide biosynthesis; APT1 has a paralog, APT2, that arose from the whole genome duplication
	0.61101992103775	CAGL0K07634g	GAT1	Ortholog(s) have sequence-specific DNA binding, transcription factor activity, RNA polymerase II transcription factor binding and transcriptional activator activity, more	C4_05880W	GAT1	GATA-type transcription factor; regulator of nitrogen utilization; required for nitrogen catabolite repression and utilization of isoleucine, tyrosine and tryptophan N sources; required for virulence in a mouse systemic infection model	YFL021W	GAT1	MEP80|NIL1	Transcriptional activator of nitrogen catabolite repression genes; contains a GATA-1-type zinc finger DNA-binding motif; activity and localization regulated by nitrogen limitation and Ure2p; different translational starts produce two major and two minor isoforms that are differentially regulated and localized
	0.594964639410226	CAGL0J08184g		Ortholog(s) have basic amino acid transmembrane transporter activity, role in basic amino acid transport and endoplasmic reticulum localization				YNL270C	ALP1	arginine permease ALP1|APL1	Arginine transporter; expression is normally very low and it is unclear what conditions would induce significant expression; ALP1 has a paralog, CAN1, that arose from the whole genome duplication
	0.58397835582233	CAGL0A03212g		Ortholog(s) have ammonium transmembrane transporter activity, role in ammonium transport, nitrogen utilization, transmembrane transport and mitochondrion, plasma membrane localization				YDR384C	ATO3	putative ammonium permease ATO3	Plasma membrane protein, putative ammonium transporter; regulation pattern suggests a possible role in export of ammonia from the cell; phosphorylated in mitochondria; member of the TC 9.B.33 YaaH family of putative transporters
	0.558367103776862	CAGL0I08613g	DUR3	Putative plasma membrane polyamine transporter
	0.557385755683795	CAGL0K10362g		Ortholog(s) have L-ornithine transmembrane transporter activity, role in arginine biosynthetic process, mitochondrial ornithine transport and mitochondrial envelope localization	C3_04660C	ARG11	Putative ornithine transporter of the mitochondrial inner membrane; induced during the mating process	YOR130C	ORT1	ARG11	Ornithine transporter of the mitochondrial inner membrane; exports ornithine from mitochondria as part of arginine biosynthesis; functionally complemented by human ortholog, SLC25A15, which is associated with hyperammonaemia-hyperornithinaemia-homocitrullinuria (HHH) syndrome, but HHH-associated variants fail to complement
	0.527258862846442	CAGL0M14113g	TNR2	High-affinity transporter of NAD+ precursors; strongly induced under niacin-limiting conditions
	-0.545668826375614	CAGL0C05555g		Ortholog(s) have guanine deaminase activity, role in cellular response to drug and cytosol localization	C7_00870W		Putative guanine deaminase; mutation confers hypersensitivity to toxic ergosterol analog; Spider biofilm induced	YDL238C	GUD1	guanine deaminase	Histidinol-phosphate aminotransferase; catalyzes the seventh step in histidine biosynthesis; responsive to general control of amino acid biosynthesis; mutations cause histidine auxotrophy and sensitivity to Cu, Co, and Ni salts
	-0.559911984453075	CAGL0C01243g		Ortholog(s) have histidinol-phosphate transaminase activity, role in histidine biosynthetic process, response to nickel cation and cytosol, nucleus localization	C4_00650W	HIS5	Putative histidinol-phosphate aminotransferase; Gcn4p-regulated; protein present in exponential and stationary growth phase yeast cultures	YIL116W	HIS5	histidinol-phosphate transaminase	Histidinol-phosphate aminotransferase; catalyzes the seventh step in histidine biosynthesis; responsive to general control of amino acid biosynthesis; mutations cause histidine auxotrophy and sensitivity to Cu, Co, and Ni salts
	-0.59655038591321	CAGL0M02981g		Ortholog(s) have phosphopentomutase activity, role in guanosine catabolic process, inosine catabolic process, purine ribonucleoside salvage and cytosol, nucleus localization	C3_07490W		Ortholog(s) have phosphopentomutase activity, role in guanosine catabolic process, inosine catabolic process, purine ribonucleoside salvage and cytosol, nucleus localization	YMR278W	PRM15	PGM3|phosphoribomutase PRM15	Peroxisomal cystathionine beta-lyase; converts cystathionine into homocysteine; may be redox regulated by Gto1p; involved in the release of the aromatic thiol 3-mercaptohexanol during wine fermentation
	-0.710378704361248	CAGL0C02321g	PHM8	Ortholog(s) have lysophosphatidic acid phosphatase activity, nucleotidase activity and role in cellular response to phosphate starvation, nucleotide catabolic process, response to carbon starvation, triglyceride homeostasis				YER037W	PHM8	bifunctional nucleotidase/lysophosphatidic acid phosphatase	Lysophosphatidic acid (LPA) phosphatase, nucleotidase; principle and physiological nucleotidase working on GMP, UMP and CMP; involved in LPA hydrolysis in response to phosphate starvation and ribose salvage pathway; phosphatase activity is soluble and Mg2+ dependent; expression is induced by low phosphate levels and by inactivation of Pho85p; repressed by Gcn4p under normal conditions; PHM8 has a…
	-0.737447368126185	CAGL0H02893g		Ortholog(s) have mitochondrion localization				YJL070C	YJL070C	metallo-dependent hydrolase superfamily protein	Putative metallo-dependent hydrolase superfamily protein; similar to AMP deaminases but lacks key catalytic residues and does not rescue purine nucleotide metabolic defect of quadruple aah1 ade8 amd1 his1 mutant; may regulate purine nucleotide homeostasis as overexpression in an AMD1 strain grown in adenine results in greatly reduced GDP and GTP intracellular levels; not an essential gene; YJL070…
	-0.78377790753698	CAGL0E06380g		Ortholog(s) have ATP-dependent NAD(P)H-hydrate dehydratase activity, role in nicotinamide nucleotide metabolic process and cytosol localization	C6_02030C		Putative protein of unknown function; stationary phase enriched protein	YKL151C	YKL151C	NADHX dehydratase	Widely-conserved NADHX dehydratase; converts (S)-NADHX to NADH in ATP-dependent manner; YKL151C promoter contains STREs (stress response elements) and expression is induced by heat shock or methyl methanesulfonate; downstream intergenic region drives antisense expression and mediates coordinated regulation of YKL151C and GPM1 phosphoglycerate mutase; protein abundance increases in response to DNA…
Carbon Metabolism	0.745952612564376	CAGL0D02640g		Has domain(s) with predicted substrate-specific transmembrane transporter activity, transmembrane transporter activity, role in transmembrane transport and integral component of membrane, membrane localization
	0.735171494791042	CAGL0A02321g	HXT3	Ortholog(s) have fructose transmembrane transporter activity, glucose transmembrane transporter activity, mannose transmembrane transporter activity and role in fructose import across plasma membrane, glucose import across plasma membrane				YHR096C	HXT5	hexose transporter HXT5	Hexose transporter with moderate affinity for glucose; induced in the presence of non-fermentable carbon sources, induced by a decrease in growth rate, contains an extended N-terminal domain relative to other HXTs; HXT5 has a paralog, HXT3, that arose from the whole genome duplication
	0.538523213919291	CAGL0A01628g	MIG1	Transcriptional regulatory protein	C5_02940C	MIG1	C2H2 transcription factor; repressor; regulates genes for carbon source utilization; Tup1-dependent and independent functions; hyphal, Hap43 and caspofungin repressed; Spider and flow model biofilm induced	YGL035C	MIG1	transcription factor MIG1|TDS22|SSN1|CAT4	Transcription factor involved in glucose repression; sequence specific DNA binding protein containing two Cys2His2 zinc finger motifs; regulated by the SNF1 kinase and the GLC7 phosphatase; regulates filamentous growth along with Mig2p in response to glucose depletion; activated in stochastic pulses of nuclear localization, shuttling between cytosol and nucleus depending on external glucose level…
	-0.509951582394739	CAGL0B00748g		Ortholog(s) have role in negative regulation of gluconeogenesis, proteasome-mediated ubiquitin-dependent protein catabolic process and GID complex, cytosol, mitotic spindle pole body, nucleus localization	C7_03240W		Ortholog of S. cerevisiae Gid7, a GID complex protein; involved in proteasome-dependent catabolite inactivation of fructose-1,6-bisphosphatase; Hap43-repressed gene	YCL039W	GID7	glucose-induced degradation complex subunit GID7|MOH2	Subunit of GID Complex that binds directly to central component Vid30p; GID complex is involved in proteasome-dependent catabolite inactivation of fructose-1,6-bisphosphatase; Gid7p contains six WD40 repeats; computational analysis suggests that Gid7p and Moh1p have similar functions
	-0.512282718412052	CAGL0I05148g	DLD1	D-lactate ferricytochrome C oxidoreductase	C3_07360W	DLD2	Ortholog(s) have D-lactate dehydrogenase (cytochrome) activity, role in lactate catabolic process and mitochondrial inner membrane localization	YDL174C	DLD1	D-lactate dehydrogenase	Major mitochondrial D-lactate dehydrogenase; oxidizes D-lactate to pyruvate, transcription is heme-dependent, repressed by glucose, and derepressed in ethanol or lactate; located in the mitochondrial inner membrane
	-0.525849388196698	CAGL0M10439g		Ortholog(s) have alpha,alpha-trehalase activity, calcium ion binding activity, role in ascospore formation, cellular response to desiccation, trehalose catabolic process involved in cellular response to stress and cytosol localization	CR_00560W	NTH1	Neutral trehalase; hyphal induction in mutant delayed but not reduced overall; not required for virulence in mice; possible regulatory cAMP-dependent phosphorylation at S10,S213; Hap43-repressed gene; Spider biofilm induced	YDR001C	NTH1	alpha,alpha-trehalase NTH1	Neutral trehalase, degrades trehalose; required for thermotolerance and may mediate resistance to other cellular stresses; phosphorylated and activated by Cdc28p at the G1/S phase transition to coordinately regulate carbohydrate metabolism and the cell cycle; inhibited by Dcs1p; NTH1 has a paralog, NTH2, that arose from the whole genome duplication
	-0.540024586894312	CAGL0L01925g	UGP1	Putative UDP-glucose pyrophosphorylase; increased protein abundance in azole resistant strain	CR_04660C	UGP1	UTP-glucose-1-phosphaturidyl transferase; localizes to yeast, not hyphal cell surface; Hog1-repressed; stationary phase enriched; induced in oralpharyngeal candidasis; rat catheter biofilm repressed; Bcr1-repressed in RPMI a/a biofilms	YKL035W	UGP1	UTP glucose-1-phosphate uridylyltransferase	UDP-glucose pyrophosphorylase (UGPase); catalyses the reversible formation of UDP-Glc from glucose 1-phosphate and UTP, involved in a wide variety of metabolic pathways, expression modulated by Pho85p through Pho4p; involved in PKA-mediated oxidative stress resistance and long-term survival in stationary phase; UGP1 has a paralog, YHL012W, that arose from the whole genome duplication
	-0.553752769503402	CAGL0C01397g		Ortholog(s) have 6-phosphofructo-2-kinase activity and role in fructose 2,6-bisphosphate metabolic process	C1_08950W	PFK26	Putative 6-phosphofructo-2-kinase; protein repressed during the mating process	YIL107C	PFK26	PFK-2|PFK2	6-phosphofructo-2-kinase; inhibited by phosphoenolpyruvate and sn-glycerol 3-phosphate; has negligible fructose-2,6-bisphosphatase activity; transcriptional regulation involves protein kinase A
	-0.565182921690508	CAGL0K10626g		Ortholog(s) have glycogen (starch) synthase activity, role in glycogen biosynthetic process and mitochondrion localization	CR_00780C	GSY1	UDP glucose/starch glucosyltransferase; transcript repressed by yeast-hyphal switch, Efg1-regulated; strong oxidative stress induced; colony morphology-related regulation by Ssn6; stationary phase enriched; flow model biofilm induced	YFR015C	GSY1	glycogen (starch) synthase GSY1	Glycogen synthase; expression induced by glucose limitation, nitrogen starvation, environmental stress, and entry into stationary phase; GSY1 has a paralog, GSY2, that arose from the whole genome duplication; relocalizes from nucleus to cytoplasmic foci upon DNA replication stress
	-0.566625445856298	CAGL0L01177g	FRDS1	Putative soluble fumarate reductase				YEL047C	FRD1	fumarate reductase|FRDS1	Soluble fumarate reductase; required with isoenzyme Osm1p for anaerobic growth; may interact with ribosomes, based on co-purification experiments; authentic, non-tagged protein is detected in purified mitochondria in high-throughput studies; similar to Arxula adeninovorans fumarate reductase; protein abundance increases in response to DNA replication stress; FRD1 has a paralog, OSM1, that arose f…
	-0.583124297903134	CAGL0C05027g		Ortholog(s) have role in acetate catabolic process, alcohol metabolic process, carnitine metabolic process, cellular respiration and cytosol, mitochondrion localization	C1_01740W	CTN1	Carnitine acetyl transferase; required for growth on nonfermentable carbon sources, not for hyphal growth or virulence in mice; induced in macrophage; macrophage/pseudohyphal-repressed after 16 hr; rat catheter, Spider biofilm induced	YAR035W	YAT1	carnitine O-acetyltransferase YAT1	Outer mitochondrial carnitine acetyltransferase; minor ethanol-inducible enzyme involved in transport of activated acyl groups from the cytoplasm into the mitochondrial matrix; phosphorylated
	-0.594908656456118	CAGL0B03465g		Ortholog(s) have role in ethanol metabolic process and mitochondrial inner membrane localization	C2_06430C		Ortholog(s) have role in ethanol metabolic process and mitochondrial inner membrane localization	YLR251W	SYM1	ethanol metabolism protein	Protein required for ethanol metabolism; induced by heat shock and localized to the inner mitochondrial membrane; homologous to mammalian peroxisomal membrane protein Mpv17; human homolog MPV17 is implicated in hepatocerebral mtDNA depletion syndromes (MDDS), and complements yeast null mutant
	-0.60005541534838	CAGL0E05148g		Ortholog(s) have alpha-mannosidase activity, role in oligosaccharide catabolic process and cytosol, fungal-type vacuole membrane localization	C4_02360W	AMS1	Putative alpha-mannosidase; transcript regulated by Nrg1; induced during cell wall regeneration; flow model biofilm induced; Spider biofilm induced	YGL156W	AMS1	alpha-mannosidase	Vacuolar alpha mannosidase; involved in free oligosaccharide (fOS) degradation; delivered to the vacuole in a novel pathway separate from the secretory pathway
	-0.6075869044371	CAGL0M03377g		Ortholog(s) have 1,4-alpha-glucan branching enzyme activity, role in glycogen biosynthetic process and cytoplasm localization	C6_03340C	GLC3	Putative 1,4-glucan branching enzyme; fluconazole-induced; colony morphology-related gene regulation by Ssn6; stationary phase enriched protein	YEL011W	GLC3	1,4-alpha-glucan branching enzyme|GHA1	Glycogen branching enzyme, involved in glycogen accumulation; green fluorescent protein (GFP)-fusion protein localizes to the cytoplasm in a punctate pattern; relocalizes from nucleus to cytoplasmic foci upon DNA replication stress; glycogen accumulation defect of the null mutant is functionally complemented by human GBE1, which is associated with glycogen storage disease
	-0.609680517429358	CAGL0H02695g		Ortholog(s) have glycogenin glucosyltransferase activity and role in glycogen biosynthetic process				YKR058W	GLG1	glycogenin glucosyltransferase GLG1	Glycogenin glucosyltransferase; self-glucosylating initiator of glycogen synthesis, also glucosylates n-dodecyl-beta-D-maltoside; SWAT-GFP and mCherry fusion proteins localize to the cell periphery and vacuole respectively; similar to mammalian glycogenin; GLG1 has a paralog, GLG2, that arose from the whole genome duplication
	-0.615716931449436	CAGL0L00803g		Ortholog(s) have role in regulation of glycogen biosynthetic process and cytoplasm localization				YIL045W	PIG2	putative protein phosphatase regulator PIG2	Putative type-1 protein phosphatase targeting subunit; tethers Glc7p type-1 protein phosphatase to Gsy2p glycogen synthase; PIG2 has a paralog, GIP2, that arose from the whole genome duplication
	-0.620106372982912	CAGL0K12958g		Putative stress-induced alcohol dehydrogenase; gene is upregulated in azole-resistant strain
	-0.632255713293468	CAGL0I01100g	GCY1	Ortholog(s) have alditol:NADP+ 1-oxidoreductase activity, glycerol dehydrogenase [NAD(P)+] activity, mRNA binding activity	C3_07340W	GCY1	Aldo/keto reductase; mutation confers hypersensitivity to toxic ergosterol analog; farnesol-repressed; stationary phase enriched protein; flow model biofilm induced; Spider biofilm repressed	YOR120W	GCY1	glycerol 2-dehydrogenase (NADP(+)) GCY1|GCY	Glycerol dehydrogenase; involved in an alternative pathway for glycerol catabolism used under microaerobic conditions; also has mRNA binding activity; member of the aldo-keto reductase (AKR) family; human homolog AKR1B1 can complement yeast null mutant; protein abundance increases in response to DNA replication stress; GCY1 has a paralog, YPR1, that arose from the whole genome duplication
	-0.65518789030512	CAGL0I01122g	GRE3	Ortholog(s) have D-xylose:NADP reductase activity, NADPH binding, mRNA binding activity	C5_02930C	GRE3	Putative D-xylose reductase; antigenic in murine systemic infection; soluble protein in hyphae; induced by farnesol, macrophage interaction and by Mnl1 under weak acid stress; stationary-phase enriched protein; Spider biofilm induced	YHR104W	GRE3	trifunctional aldehyde reductase/xylose reductase/glucose 1-dehydrogenase (NADP(+))	Aldose reductase; involved in methylglyoxal, d-xylose, arabinose, and galactose metabolism; stress induced (osmotic, ionic, oxidative, heat shock, starvation and heavy metals); regulated by the HOG pathway; protein abundance increases in response to DNA replication stress
	-0.742664952799685	CAGL0K03421g		Ortholog(s) have phosphoglucomutase activity	CR_02820W	PGM2	Ortholog of S. cerevisiae Pgm2; induced in planktonic culture; Tye7p-regulated; flow model biofilm induced; rat catheter biofilm repressed	YMR105C	PGM2	phosphoglucomutase PGM2|GAL5	Phosphoglucomutase; catalyzes the conversion from glucose-1-phosphate to glucose-6-phosphate, which is a key step in hexose metabolism; functions as the acceptor for a Glc-phosphotransferase; protein abundance increases in response to DNA replication stress; PGM2 has a paralog, PGM1, that arose from the whole genome duplication
	-0.780617193178228	CAGL0F04895g		Ortholog(s) have glycogen phosphorylase activity, role in glycogen catabolic process, response to heat and cell surface, cytoplasm, hyphal cell wall localization	C7_00930W	GPH1	Putative glycogen phosphorylase; role in glycogen metabolism; regulated by Ssk1, Mig1, Tup1, Hap43; fluconazole-induced; localizes to cell surface of hyphae, not yeast; stationary phase enriched protein; Spider biofilm induced	YPR160W	GPH1	glycogen phosphorylase	Glycogen phosphorylase required for the mobilization of glycogen; non-essential; regulated by cyclic AMP-mediated phosphorylation; phosphorylation by Cdc28p may coordinately regulate carbohydrate metabolism and the cell cycle; expression is regulated by stress-response elements and by the HOG MAP kinase pathway
	-0.805729358816683	CAGL0H02387g		Putative trehalose-6-phosphate synthase/phosphatase subunit; gene is upregulated in azole-resistant strain	C2_10690W	TPS3	Predicted trehalose-phosphate synthase regulatory subunit; regulated by Efg1; regulated by Tsa1, Tsa1B under H2O2 stress conditions; flow model biofilm induced (reports differ)	YMR261C	TPS3	trehalose 6-phosphate synthase/phosphatase complex subunit	Regulatory subunit of trehalose-6-phosphate synthase/phosphatase; involved in synthesis of storage carbohydrate trehalose; expression is induced by stress conditions and repressed by the Ras-cAMP pathway; TPS3 has a paralog, TSL1, that arose from the whole genome duplication
	-0.830101229619178	CAGL0F04719g		Ortholog(s) have glycogen (starch) synthase activity, role in glycogen biosynthetic process and cytoplasm, nucleus localization				YLR258W	GSY2	glycogen (starch) synthase GSY2	Glycogen synthase; expression induced by glucose limitation, nitrogen starvation, heat shock, and stationary phase; activity regulated by cAMP-dependent, Snf1p and Pho85p kinases as well as by the Gac1p-Glc7p phosphatase; GSY2 has a paralog, GSY1, that arose from the whole genome duplication; relocalizes from cytoplasm to plasma membrane upon DNA replication stress
	-0.975963132201163	CAGL0M14047g		Putative NADPH-dependent cinnamyl alcohol dehydrogenase; gene is upregulated in azole-resistant strain				YMR318C	ADH6	NADP-dependent alcohol dehydrogenase|ADHVI	NADPH-dependent medium chain alcohol dehydrogenase; has broad substrate specificity; member of the cinnamyl family of alcohol dehydrogenases; may be involved in fusel alcohol synthesis or in aldehyde tolerance; protein abundance increases in response to DNA replication stress
Ion Homeostasis	0.829387520418077	CAGL0F05709g		Ortholog(s) have role in bipolar cellular bud site selection, cellular cation homeostasis and cytoplasm, nucleus localization	C4_07150W		bZIP transcription factor; possibly transcriptionally regulated upon hyphal formation; Hap43; F-12/CO2 early biofilm induced; Spider biofilm induced	YDR184C	ATC1	LIC4	Nuclear protein; possibly involved in regulation of cation stress responses and/or in the establishment of bipolar budding pattern; relative distribution to the nucleus decreases upon DNA replication stress
	0.823450483170771	CAGL0D01265g	MT-I	Copper-binding metallothionein, involved in sequestration of metal ions; inducible by copper and silver; gene used for molecular typing of C. glabrata strain isolates
	0.736678429902447	CAGL0H04279g	MT-IIB	Copper-binding metallothionein, involved in sequestration of metal ions; inducible by copper and silver; present in multiple (3-9) tandemly arranged copies in various strains
	0.599560850023396	CAGL0E04092g	SIT1	Putative siderophore-iron transporter with 14 transmembrane domains; required for iron-dependent survival in macrophages; mRNA levels elevated under iron deficiency conditions; plasma membrane localized	C2_08050C	SIT1	Transporter of ferrichrome siderophores, not ferrioxamine B; required for human epithelial cell invasion in vitro, not for mouse systemic infection; regulated by iron, Sfu1, Rfg1, Tup1, Hap43; rat catheter and Spider biofilm induced	YHL040C	ARN1	siderophore transporter	ARN family transporter for siderophore-iron chelates; responsible for uptake of iron bound to ferrirubin, ferrirhodin, and related siderophores; protein increases in abundance and relocalizes to the vacuole upon DNA replication stress
	-0.573862979483846	CAGL0K07337g		Has domain(s) with predicted ion channel activity, role in ion transport and membrane localization
Sulfur Metabolism	-0.590650937236102	CAGL0K08668g	MET28	bZIP domain-containing protein	C7_00730W	MET28	Predicted bZIP domain-containing transcription factor; protein induced during the mating process; possibly essential, disruptants not obtained by UAU1 method; Hap43-repressed; rat catheter biofilm induced	YIR017C	MET28		bZIP transcriptional activator in the Cbf1p-Met4p-Met28p complex; participates in the regulation of sulfur metabolism
Mitochondrial Function	-0.676559547351228	CAGL0L08426g	SUE1	Ortholog(s) have role in protein catabolic process and mitochondrial envelope localization				YPR151C	SUE1		Protein required for degradation of unstable forms of cytochrome c; located in the mitochondria
	-0.760401650246527	CAGL0B01875g		Ortholog(s) have mitochondrial respiratory chain complex IV, mitochondrial respiratory chain supercomplex localization				YDR119W-A	COX26		Stabilizes or regulates formation of respiratory chain supercomplexes composed of Complex III (ubiquinol-cytochrome c reductase) and Complex IV (cytochrome c oxidase)
	-0.833261812150692	CAGL0J09262g		Ortholog(s) have ATPase binding activity, role in negative regulation of ATPase activity and mitochondrion localization				YDL130W-A	STF1	ATPase-binding protein|AIS2	Protein involved in regulation of the mitochondrial F1F0-ATP synthase; Stf1p and Stf2p act as stabilizing factors that enhance inhibitory action of the Inh1p protein; protein abundance increases in response to DNA replication stress; STF1 has a paralog, INH1, that arose from the whole genome duplication
Phosphate metabolism	0.948754983080794	CAGL0B02475g	PHO84	Ortholog(s) have inorganic phosphate transmembrane transporter activity, manganese ion transmembrane transporter activity, phosphate:proton symporter activity, selenite:proton symporter activity	C1_11480W	PHO84	High-affinity phosphate transporter; transcript regulated by white-opaque switch; Hog1, ciclopirox olamine or alkaline induced; caspofungin, stress repressed; upregulated in RHE model; Spider and flow model biofilm induced, Hap43-induced	YML123C	PHO84	phosphate transporter PHO84|phoT	High-affinity inorganic phosphate (Pi) transporter; also low-affinity manganese transporter; regulated by Pho4p and Spt7p; mutation confers resistance to arsenate; exit from the ER during maturation requires Pho86p; cells overexpressing Pho84p accumulate heavy metals but do not develop symptoms of metal toxicity
Cell Wall Organization	0.702326899383996	CAGL0L05434g	SUN4	Ortholog(s) have role in fungal-type cell wall organization or biogenesis, mitochondrion organization and fungal-type cell wall, fungal-type vacuole localization				YJL116C	NCA3	SUN family protein NCA3	Protein involved in mitochondrion organization; functions with Nca2p to regulate mitochondrial expression of subunits 6 (Atp6p) and 8 (Atp8p) of the Fo-F1 ATP synthase; SWAT-GFP, seamless-GFP and mCherry fusion proteins localize to the vacuole; member of the SUN family; expression induced in cells treated with the mycotoxin patulin; NCA3 has a paralog, UTH1, that arose from the whole genome dupli…
	0.681396818407488	CAGL0J11242g		Ortholog(s) have GTP binding, GTPase activity and role in filamentous growth of a population of unicellular organisms, fungal-type cell wall organization	C1_06730W	RAC1	G-protein of RAC subfamily; required for embedded filamentous growth, not for serum-induced hyphal growth; dynamic localization at plasma membrane and nucleus; similar to, but not interchangeable with, Cdc42p; lacks S. cerevisiae homolog	YNL180C	RHO5	Rho family GTPase RHO5|YNS0	Non-essential small GTPase of the Rho/Rac family of Ras-like proteins; RAC1 ortholog; regulated by phosphorylation and ubiquitination; likely involved in protein kinase C (Pkc1p)-dependent signal transduction pathway that controls cell integrity
	0.558582020257984	CAGL0M05599g		Ortholog(s) have cell surface, endoplasmic reticulum, extracellular region, fungal-type vacuole, hyphal cell wall localization	C3_01550C	TOS1	Protein similar to alpha agglutinin anchor subunit; secreted; exogenously expressed protein is a substrate for Kex2 processing in vitro; fluconazole-induced; induced by alpha pheromone in SpiderM medium; Hap43-induced	YBR162C	TOS1		Covalently-bound cell wall protein of unknown function; identified as a cell cycle regulated SBF target gene; deletion mutants are highly resistant to treatment with beta-1,3-glucanase; has sequence similarity to YJL171C
	0.519829159444472	CAGL0H06413g	SSR1	Putative GPI-linked cell wall protein	C7_00860W	SSR1	Beta-glucan associated ser/thr rich cell-wall protein with a role in cell wall structure; GPI anchor; similar mRNA abundance in yeast-form and germ tubes; detected at germ tube plasma membrane; repressed in cells treated with Congo Red	YLR390W-A	CCW14	ICWP|YLR391W|SSR1|YLR391W-A	Covalently linked cell wall glycoprotein; present in the inner layer of the cell wall
	-0.527049009885372	CAGL0H10120g		Ortholog(s) have glucan endo-1,6-beta-glucosidase activity and role in fungal-type cell wall beta-glucan metabolic process, fungal-type cell wall disassembly involved in conjugation with cellular fusion	C1_14060W		Glucan 1,3-beta-glucosidase; regulated by Nrg1, Tup1 and possibly Tac1; induced by NO and during cell wall regeneration; stationary phase enriched; possibly essential (UAU1 method); F-12/CO2 early biofilm induced; flow biofilm repressed	YBR056W	YBR056W	17-beta-hydroxysteroid dehydrogenase-like protein	Putative glycoside hydrolase of the mitochondrial intermembrane space
Stress Response	1.0266499367955	CAGL0I06644g		Putative GPI-linked cell wall protein				YER150W	SPI1		GPI-anchored cell wall protein involved in weak acid resistance; basal expression requires Msn2p/Msn4p; expression is induced under conditions of stress and during the diauxic shift; SPI1 has a paralog, SED1, that arose from the whole genome duplication
	0.660147117542869	CAGL0J00891g		Putative protein required for growth at low temperature; gene is downregulated in azole-resistant strain
	0.559069116847467	CAGL0J04202g	HSP12	Heat shock protein; gene is upregulated in azole-resistant strain; expression upregulated in biofilm vs planktonic cell culture	C5_02110W		Putative heat shock protein; decreased expression in hyphae; transcription is increased in populations of cells exposed to fluconazole over multiple generations; overexpression increases resistance to farnesol and azoles	YFL014W	HSP12	lipid-binding protein HSP12|HOR5|GLP1	Plasma membrane protein involved in maintaining membrane organization; involved in maintaining organization during stress conditions; induced by heat shock, oxidative stress, osmostress, stationary phase, glucose depletion, oleate and alcohol; protein abundance increased in response to DNA replication stress and dietary restriction; regulated by the HOG and Ras-Pka pathways; required for dietary …
	-0.65500198615195	CAGL0H04037g		Ortholog(s) have heat shock protein binding, protein phosphatase regulator activity and role in glycogen metabolic process, meiotic nuclear division, mitotic spindle assembly checkpoint, response to heat	C7_00660W	GAC1	Putative regulatory subunit of ser/thr phosphoprotein phosphatase 1; fluconazole-induced; caspofungin repressed; transcript induced by Mnl1 under weak acid stress; regulated by Nrg1, Tup1; Spider and flow model biofilm induced	YOR178C	GAC1	protein phosphatase regulator GAC1	Regulatory subunit for Glc7p type-1 protein phosphatase (PP1); tethers Glc7p to Gsy2p glycogen synthase, binds Hsf1p heat shock transcription factor, required for induction of some HSF-regulated genes under heat shock; GAC1 has a paralog, PIG1, that arose from the whole genome duplication
	-0.680181003536424	CAGL0M04763g		Ortholog(s) have role in cellular response to drug and cytosol, nucleus localization	C2_00770W		Putative protein of unknown function; Hap43p-repressed gene; mutation confers hypersensitivity to toxic ergosterol analog, and to amphotericin B	YOR289W	YOR289W		Putative protein of unknown function; transcription induced by the unfolded protein response; green fluorescent protein (GFP)-fusion protein localizes to both the cytoplasm and the nucleus
	-0.808536956384006	CAGL0M08822g	HSP78	Ortholog(s) have ATPase activity, misfolded protein binding activity, role in cellular response to heat, mitochondrial genome maintenance, protein refolding, protein stabilization, protein unfolding and mitochondrial matrix localization	C2_03390C	HSP78	Heat-shock protein; regulated by macrophage response, Nrg1, Mig1, Gcn2, Gcn4, Mnl1p; heavy metal (cadmium) stress-induced; stationary phase enriched protein; rat catheter and Spider biofilm induced	YDR258C	HSP78	chaperone ATPase HSP78	Oligomeric mitochondrial matrix chaperone; cooperates with Ssc1p in mitochondrial thermotolerance after heat shock; able to prevent the aggregation of misfolded proteins as well as resolubilize protein aggregates
	-1.06047030961324	CAGL0H02101g		Ortholog(s) have role in RNA metabolic process and biofilm matrix, cytoplasm, nucleus localization	C2_07630C		Possible stress protein; increased transcription associated with CDR1 and CDR2 overexpression or fluphenazine treatment; regulated by Sfu1, Nrg1, Tup1; stationary phase enriched protein; Spider biofilm induced	YHR087W	RTC3	HGI1	Protein of unknown function involved in RNA metabolism; has structural similarity to SBDS, the human protein mutated in Shwachman-Diamond Syndrome (the yeast SBDS ortholog = SDO1); null mutation suppresses cdc13-1 temperature sensitivity; protein abundance increases in response to DNA replication stress
	-1.26705608365978	CAGL0G03289g	SSA3	Heat shock protein of the HSP70 family	C1_13480W	HSP70	Putative hsp70 chaperone; role in entry into host cells; heat-shock, amphotericin B, cadmium, ketoconazole-induced; surface localized in yeast and hyphae; antigenic in host; farnesol-downregulated in biofilm; Spider biofilm induced	YER103W	SSA4	Hsp70 family chaperone SSA4|YG107	Heat shock protein that is highly induced upon stress; plays a role in SRP-dependent cotranslational protein-membrane targeting and translocation; member of the HSP70 family; cytoplasmic protein that concentrates in nuclei upon starvation; SSA4 has a paralog, SSA3, that arose from the whole genome duplication
Biofilm Formation	0.931015930369868	CAGL0E06644g	EPA1	Sub-telomerically encoded adhesin with a role in cell adhesion; GPI-anchored cell wall protein; N-terminal ligand binding domain binds to ligands containing a terminal galactose residue; belongs to adhesin cluster I
	0.759813956946419	CAGL0M07634g		Ortholog(s) have sequence-specific DNA binding, transcription factor activity, sequence-specific DNA binding activity	CR_07890W	EFG1	bHLH transcription factor; required for white-phase cell type, RPMI and Spider biofilm formation, hyphal growth, cell-wall gene regulation; roles in adhesion, virulence; Cph1 and Efg1 have role in host cytokine response; binds E-box	YMR016C	SOK2		Nuclear protein that negatively regulates pseudohyphal differentiation; plays a regulatory role in the cyclic AMP (cAMP)-dependent protein kinase (PKA) signal transduction pathway; relocalizes to the cytosol in response to hypoxia; SOK2 has a paralog, PHD1, that arose from the whole genome duplication
	0.710034114037216	CAGL0E06688g	EPA3	Epithelial adhesion protein; belongs to adhesin cluster I; GPI-anchored
	-0.563628657790798	CAGL0F07117g		Putative subunit of the heterotrimeric G protein; gene is upregulated in azole-resistant strain				YGL121C	GPG1		Proposed gamma subunit of the heterotrimeric G protein; interacts with the receptor Gpr1p; involved in regulation of pseudohyphal growth; requires Gpb1p or Gpb2p to interact with Gpa2p; overproduction causes prion curing
	-0.793433705115406	CAGL0M14069g	PWP6	Adhesin-like protein with similarity to S. cerevisiae flocculins, cell wall proteins that mediate adhesion; predicted GPI anchor; belongs to adhesin cluster II
	-1.10585285371067	CAGL0I11011g		Putative adhesin; belongs to adhesin cluster V
	-1.60406569948952	CAGL0L13299g	EPA11	Putative adhesin; belongs to adhesin cluster I
	-1.73247323581325	CAGL0L13332g	EPA13	Sub-telomerically encoded lectin-like adhesin with a role in cell adhesion; contains multiple tandem repeats; predicted GPI-anchor; belongs to adhesin cluster I
Cytoskeleton/Cell Cycle	0.760074968470226	CAGL0E05456g		Ortholog(s) have role in ascospore formation, positive regulation of transcription from RNA polymerase II promoter	C2_09880C		Putative protein of unknown function; Plc1-regulated; transcript induced by Mnl1 under weak acid stress; flow model, rat catheter, Spider biofilm induced	YOR338W	YOR338W		Putative protein of unknown function; YOR338W transcription is regulated by Azf1p and its transcript is a specific target of the G protein effector Scp160p; identified as being required for sporulation in a high-throughput mutant screen; YOR338W has a paralog, FUN19, that arose from the whole genome duplication
	0.680390048766629	CAGL0F08129g	SDA1	Ortholog(s) have role in actin cytoskeleton organization, ribosomal large subunit biogenesis, ribosomal large subunit export from nucleus, traversing start control point of mitotic cell cycle and nucleolus localization	CR_05660W	SDA1	Predicted nuclear protein involved in actin cytoskeleton organization, passage through Start, 60S ribosome biogenesis; rat catheter biofilm induced; Hap43-induced	YGR245C	SDA1		Protein required for actin organization and passage through Start; highly conserved nuclear protein; required for actin cytoskeleton organization; plays a critical role in G1 events; binds Nap1p; involved in 60S ribosome biogenesis
	0.616328077657728	CAGL0L12892g		Ortholog(s) have role in actin cytoskeleton organization, inositol lipid-mediated signaling, vacuole organization and plasma membrane localization	C4_02720C		Putative plasma membrane protein; Plc1-regulated; Spider biofilm induced	YKL051W	SFK1		Plasma membrane protein that may act to generate normal levels of PI4P; may act together with or upstream of Stt4p; at least partially mediates proper localization of Stt4p to the plasma membrane
	0.592602208497199	CAGL0B04235g	SCP120	Protein with a predicted role in maintenance of ploidy
	0.568184100643727	CAGL0F05093g		Ortholog(s) have role in microtubule-based process and cytoplasm localization	C5_00250C		Protein with a predicted role in microtubule-related processes; Spider biofilm induced	YLR412W	BER1		Protein involved in microtubule-related processes; GFP-fusion protein localizes to the cytoplasm and is induced in response to the DNA-damaging agent MMS; YLR412W is not an essential gene; similar to Arabidopsis SRR1 gene
	0.565657695648225	CAGL0A04213g		Ortholog(s) have mRNA binding activity	CR_01500W	PIN4	Protein with similarity to S. cerevisiae Pin4p; transposon mutation affects filamentous growth	YBL051C	PIN4	MDT1	Protein involved in G2/M phase progression and response to DNA damage; interacts with Rad53p; contains an RNA recognition motif, a nuclear localization signal, and several SQ/TQ cluster domains; hyperphosphorylated in response to DNA damage
	0.507843345528214	CAGL0L11594g		Ortholog(s) have protein kinase activity	C1_10950C		Putative serine/threonine-protein kinase; possibly an essential gene, disruptants not obtained by UAU1 method	YOR119C	RIO1	protein kinase RIO1|RRP10	Serine kinase involved in cell cycle regulation and rDNA integrity; associated with late pre-40S particles via its conserved C-terminal domain and participates in late 40S biogenesis; association with pre-40S particles regulated by its catalytic ATPase site and likely occurs after the release of Rio2p from these particles; involved in cell cycle progression and processing of the 20S pre-rRNA into…
	-0.508109715892678	CAGL0J10846g		Ortholog(s) have cyclin-dependent protein serine/threonine kinase regulator activity	C5_05190W	PCL5	Putative cyclin for Pho85 kinase; Gcn4-induced; suppresses toxicity of C. albicans Gcn4 overproduction in S. cerevisiae via increased Pho85-dependent phosphorylation and degradation of Gcn4; rat catheter and Spider biofilm induced	YHR071W	PCL5		Cyclin; interacts with and phosphorylated by Pho85p cyclin-dependent kinase (Cdk), induced by Gcn4p at level of transcription, specifically required for Gcn4p degradation, may be sensor of cellular protein biosynthetic capacity
	-0.524229932783521	CAGL0J00803g		Ortholog(s) have structural constituent of cytoskeleton activity	CR_05920C	MHP1	Protein similar to S. cerevisiae Mhp1p, which is involved in microtubule stabilization; transposon mutation affects filamentous growth; possibly transcriptionally regulated upon hyphal formation; possibly an essential gene (by UAU1 method)	YJL042W	MHP1		Microtubule-associated protein involved in microtubule organization; involved in assembly and stabilization of microtubules; overproduction results in cell cycle arrest at G2 phase; similar to Drosophila protein MAP and to mammalian MAP4 proteins
	-0.565414895919905	CAGL0K07590g	MYO3	Putative myosin				YKL129C	MYO3	myosin 3	One of two type I myosins; localizes to actin cortical patches; deletion of MYO3 has little effect on growth, but myo3 myo5 double deletion causes severe defects in growth and actin cytoskeleton organization; MYO3 has a paralog, MYO5, that arose from the whole genome duplication
	-0.661704820437127	CAGL0C05577g		Ortholog(s) have role in ascospore wall assembly, ascospore-type prospore membrane assembly, mitochondrion inheritance and prospore membrane leading edge, spindle pole body localization				YDL239C	ADY3		Protein required for spore wall formation; subunit of the leading edge protein (LEP) complex (Ssp1-Ady3-Don1-Irc10) that forms a ring-like structure at the leading edge of the prospore membrane during meiosis II; mediates assembly of the LEP complex, formation of the ring-like structure via interaction with spindle pole body components and prospore membrane maturation; potentially phosphorylated …
	-0.67211260104687	CAGL0F02167g		Ortholog(s) have DNA binding activity, role in reciprocal meiotic recombination and nuclear chromosome localization	CR_01790C		Msh4 ortholog of S. cerevisiae; involved in meiotic recombination and is required for normal levels of crossing over; Spider biofilm induced	YFL003C	MSH4	MutS family protein MSH4	Protein involved in meiotic recombination; required for normal levels of crossing over, colocalizes with Zip2p to discrete foci on meiotic chromosomes, has homology to bacterial MutS protein
	-0.68645548229029	CAGL0L08338g		Putative minor isoform of tropomyosin; gene is downregulated in azole-resistant strain				YIL138C	TPM2	tropomyosin TPM2	Minor isoform of tropomyosin; binds to and stabilizes actin cables and filaments, which direct polarized cell growth and the distribution of several organelles; appears to have distinct and also overlapping functions with Tpm1p; TPM2 has a paralog, TPM1, that arose from the whole genome duplication
Protein Binding/Proteasome	0.551797471566587	CAGL0J00473g		Ortholog(s) have proteasome binding, protein binding, bridging activity, role in protein catabolic process and nucleolus, preribosome, large subunit precursor, proteasome complex localization	C6_01170W	CIC1	Putative proteasome-interacting protein; rat catheter biofilm induced	YHR052W	CIC1	NSA3	Essential protein that interacts with proteasome components; has a potential role in proteasome substrate specificity; also copurifies with 66S pre-ribosomal particles
	0.550007074005226	CAGL0D04796g		Ortholog(s) have peptide alpha-N-acetyltransferase activity	C1_06650W		Ortholog(s) have peptide alpha-N-acetyltransferase activity	YPR131C	NAT3	peptide alpha-N-acetyltransferase complex B subunit NAT3|RAD56|NAA20	Catalytic subunit of the NatB N-terminal acetyltransferase; NatB catalyzes acetylation of the amino-terminal methionine residues of all proteins beginning with Met-Asp or Met-Glu and of some proteins beginning with Met-Asn or Met-Met
	0.506918976902171	CAGL0G01562g		Ortholog(s) have phosphatidylinositol N-acetylglucosaminyltransferase activity and role in GPI anchor biosynthetic process	CR_01430W		Ortholog of S. cerevisiae Gpa15; involved in the synthesis of glycosylphosphatidylinositol (GPI) anchors; shuman Pig-H, which is also involved in GPI assembly; Spider biofilm induced	YNL038W	GPI15	phosphatidylinositol N-acetylglucosaminyltransferase GPI15	Protein involved in the synthesis of GlcNAc-PI; GlcNAc-PI is the first intermediate in the synthesis of glycosylphosphatidylinositol (GPI) anchors; homologous to the human PIG-H protein; GlcNAc-PI stands for N-acetylglucosaminyl phosphatidylinositol
	-0.505762077558693	CAGL0H03707g		Ortholog(s) have misfolded protein binding activity	CR_06080W	SIS1	Putative Type II HSP40 co-chaperone; macrophage/pseudohyphal-repressed; heavy metal (cadmium) stress-induced; heterozygous null mutant displays sensitivity to virgineone; rat catheter biofilm induced	YNL007C	SIS1	type II HSP40 co-chaperone SIS1	Type II HSP40 co-chaperone that interacts with the HSP70 protein Ssa1p; shuttles between cytosol and nucleus; mediates delivery of misfolded proteins into the nucleus for degradation; involved in proteasomal degradation of misfolded cytosolic proteins; protein abundance increases in response to DNA replication stress; polyQ aggregates sequester Sis1p and interfere with clearance of misfolded prot…
	-0.546505267218553	CAGL0I05522g		Ortholog(s) have cytoplasm localization				YER098W	UBP9	putative ubiquitin-specific protease UBP9	Ubiquitin-specific protease that cleaves ubiquitin-protein fusions; UBP9 has a paralog, UBP13, that arose from the whole genome duplication
	-0.546868876086371	CAGL0J04092g		Ortholog(s) have role in positive regulation of cellular response to hypoxia, protein localization to Golgi apparatus, protein processing, regulation of protein glycosylation	CR_05460W		Ortholog(s) have role in positive regulation of cellular response to hypoxia, protein localization to Golgi apparatus, protein processing, regulation of protein glycosylation	YOR223W	DSC3		Subunit of the DSC ubiquitin ligase complex; protein of unknown function that localizes to the ER and vacuole lumen; overexpression affects endocytic protein trafficking; ortholog of fission yeast dsc3
	-0.548516806704716	CAGL0E01815g	YPS8	Putative aspartic protease; predicted GPI-anchor; member of a YPS gene cluster that is required for virulence in mice; induced in response to low pH and high temperature
	-0.571864530148907	CAGL0G09020g		Ortholog(s) have cAMP-dependent protein kinase activity	C2_07210C	TPK2	cAMP-dependent protein kinase catalytic subunit; isoform of Tpk1; involved in regulation of filamentation, phenotypic switching and mating; needed for epithelial cell damage, engulfment and oral virulence in mice	YPL203W	TPK2	cAMP-dependent protein kinase catalytic subunit TPK2|PKA3|YKR1|PKA2	cAMP-dependent protein kinase catalytic subunit; promotes vegetative growth in response to nutrients via the Ras-cAMP signaling pathway; partially redundant with Tpk1p and Tpk3p; localizes to P-bodies during stationary phase; relocalizes to the cytosol in response to hypoxia
	-0.587103987905094	CAGL0M13783g		Ortholog(s) have thiol-dependent ubiquitin-specific protease activity and role in free ubiquitin chain depolymerization, protein K11-linked deubiquitination, protein K63-linked deubiquitination	C2_10050W		Ortholog(s) have thiol-dependent ubiquitin-specific protease activity and role in free ubiquitin chain depolymerization, protein K11-linked deubiquitination, protein K63-linked deubiquitination	YMR304W	UBP15	ubiquitin-specific protease UBP15	Ubiquitin-specific protease involved in protein deubiquitination; forms a complex with AAA peroxins Pex1p and Pex6p; deubiquitinates mono- and polyubiquitinated forms of Pex5p; deubiquitinates Clb5p, counteracting APC activity, and facilitating both Clb5p accumulation and S phase entry; physically interacts with anaphase-promoting complex/cyclosome (APC/C) activator, Cdh1p; catalytic activity reg…
	-0.629535351296972	CAGL0E02651g		Ortholog(s) have endoplasmic reticulum localization				YOR003W	YSP3	putative subtilisin-like protease YSP3	Putative precursor of the subtilisin-like protease III; SWAT-GFP and mCherry fusion proteins localize to the endoplasmic reticulum; YSP3 has a paralog, PRB1, that arose from the whole genome duplication
	-0.736055711625313	CAGL0C00275g	HSP31	Putative cysteine protease; protein differentially expressed in azole resistant strain; gene is upregulated in azole-resistant strain
	-0.759126343062458	CAGL0G02849g		Ortholog(s) have endoplasmic reticulum, mitochondrial outer membrane, nuclear envelope localization				YPL186C	UIP4		Protein that interacts with Ulp1p; a Ubl (ubiquitin-like protein)-specific protease for Smt3p protein conjugates; detected in a phosphorylated state in the mitochondrial outer membrane; also detected in ER and nuclear envelope
	-0.938216897007035	CAGL0K05247g		Ortholog(s) have ubiquitin protein ligase binding activity, role in fungal-type cell wall organization, regulation of transcription from RNA polymerase II promoter and cytosol, nucleus localization				YPR030W	CSR2	ART8|MRG19	Nuclear ubiquitin protein ligase binding protein; may regulate utilization of nonfermentable carbon sources and endocytosis of plasma membrane proteins; overproduction suppresses chs5 spa2 lethality at high temp; ubiquitinated by Rsp5p, deubiquitinated by Ubp2p; CSR2 has a paralog, ECM21, that arose from the whole genome duplication
Ribosome Biogenesis	0.751586397461807	CAGL0B01397g	NOP8	Putative nucleolar protein required for ribosome biogenesis; gene is downregulated in azole-resistant strain	C6_04330W	NOP8	Ortholog of S. cereviiae Nop8; has a role in ribosomal large subunit biogenesis; rat catheter and Spider biofilm induced	YOL144W	NOP8		Nucleolar protein required for 60S ribosomal subunit biogenesis
	0.692418698918725	CAGL0E02343g		Ortholog(s) have endoribonuclease activity, enzyme activator activity	C2_07450C	RCL1	Putative U3-containing 90S preribosome processome complex subunit; Hap43-induced; essential; S. cerevisiae ortholog is essential; represses in core stress response;	YOL010W	RCL1	rRNA-processing endoribonuclease	Endonuclease that cleaves pre-rRNA at site A2 for 18S rRNA biogenesis; subunit of U3-containing 90S preribosome processome complex involved in small ribosomal subunit assembly; stimulates Bms1p GTPase and U3 binding activity; similar to RNA cyclase-like proteins but no cyclase activity detected
	0.689865160899875	CAGL0I06490g		Ortholog(s) have role in ribosomal large subunit biogenesis and nucleolus localization	C1_08870C	JIP5	Ortholog of S. cerevisiae Jip5; predicted role in biogenesis of the large ribosomal subunit; repressed in core stress response; Hap43-induced gene	YPR169W	JIP5		Protein required for biogenesis of the large ribosomal subunit; required for biogenesis of the large ribosomal subunit; interacts with proteins involved in RNA processing, ribosome biogenesis, ubiquitination and demethylation; similar to WDR55, a human WD repeat protein; essential gene
	0.679389223794639	CAGL0J03476g		Ortholog(s) have role in cellular response to drug, ribosomal large subunit assembly and nucleolus, ribosome localization	C4_05010W		Protein with a predicted role in ribosome biogenesis; mutation confers hypersensitivity to 5-fluorocytosine (5-FC), 5-fluorouracil (5-FU); repressed in core stress response; repressed by prostaglandins; Hap43-induced	YCR072C	RSA4		WD-repeat protein involved in ribosome biogenesis; may interact with ribosomes; required for maturation and efficient intra-nuclear transport or pre-60S ribosomal subunits, localizes to the nucleolus
	0.673515611149972	CAGL0L05500g		Ortholog(s) have role in ribosomal large subunit biogenesis and cytoplasm, nucleus, ribosome localization	C7_00160C		Ortholog(s) have role in ribosomal large subunit biogenesis and cytoplasm, nucleus, ribosome localization	YJL122W	ALB1		Shuttling pre-60S factor; involved in the biogenesis of ribosomal large subunit; interacts directly with Arx1p; responsible for Tif6p recycling defects in absence of Rei1p
	0.669686604452367	CAGL0D00220g		Ortholog(s) have role in ribosomal large subunit export from nucleus and nucleolus, preribosome, large subunit precursor localization	C4_04100C	ECM1	Putative pre-ribosomal factor; decreased mRNA abundance observed in cyr1 homozygous mutant hyphae; induced by heavy metal (cadmium) stress; Hog1p regulated	YAL059W	ECM1		Pre-ribosomal factor involved in 60S ribosomal protein subunit export; associates with the pre-60S particle; shuttles between the nucleus and cytoplasm
	0.657972648275939	CAGL0L10890g		Ortholog(s) have role in cellular response to biotic stimulus, cellular response to starvation and chromosome organization, more	C1_09510W	YTM1	Protein similar to S. cerevisiae Ytm1p, which is involved in biogenesis of the large ribosomal subunit; transposon mutation affects filamentous growth; protein level decreases in stationary phase cultures; Hap43p-induced gene	YOR272W	YTM1	CST14	Constituent of 66S pre-ribosomal particles; forms a complex with Nop7p and Erb1p that is required for maturation of the large ribosomal subunit; has seven C-terminal WD repeats
	0.656696016662713	CAGL0J00957g		Ortholog(s) have ATPase activator activity, role in assembly of large subunit precursor of preribosome, cellular response to drug, ribosomal large subunit biogenesis and nucleolus, preribosome, large subunit precursor localization	C4_00510C	RLP24	Putative ribosomal protein; Hap43-induced; essential gene; heterozygous mutation confers hypersensitivity to 5-fluorocytosine (5-FC), 5-fluorouracil (5-FU), and tubercidin (7-deazaadenosine); Spider biofilm induced	YLR009W	RLP24	ATPase-activating ribosome biosynthesis protein	Essential protein required for ribosomal large subunit biogenesis; associated with pre-60S ribosomal subunits; stimulates the ATPase activity of Afg2p, which is required for release of Rlp24p from the pre-60S particle; has similarity to Rpl24Ap and Rpl24Bp
	0.640761431922197	CAGL0C03369g		Ortholog(s) have role in ribosomal large subunit export from nucleus and mitotic spindle, mitotic spindle pole body, nucleolus, nucleoplasm, preribosome, large subunit precursor localization	C6_03640W	NOG2	Putative nucleolar GTPase; repressed by prostaglandins; Hap43-induced, rat catheter and Spider biofilm induced	YNR053C	NOG2	putative GTPase NOG2|NUG2	Putative GTPase; associates with pre-60S ribosomal subunits in the nucleolus and is required for their nuclear export and maturation; recruited by ribosomal proteins L17, L35, and L37 to assembling ribosomes after 27SB pre-rRNA is generated, immediately preceding removal of ITS2
	0.619378572920444	CAGL0G07535g		Ortholog(s) have single-stranded RNA binding activity	C1_00900W	RRS1	Putative ribosome biogenesis and nuclear export protein; Hap43p-induced gene; mutation confers hypersensitivity to 5-fluorocytosine (5-FC), 5-fluorouracil (5-FU), and tubercidin (7-deazaadenosine)	YOR294W	RRS1		Essential protein that binds ribosomal protein L11; required for nuclear export of the 60S pre-ribosomal subunit during ribosome biogenesis; localizes to the nucleolus and in foci along nuclear periphery; cooperates with Ebp2p and Mps3p to mediate telomere clustering by binding Sir4p, but is not involved in telomere tethering; mouse homolog shows altered expression in Huntington's disease model m…
	0.590758198221418	CAGL0L10516g		Ortholog(s) have role in ribosomal large subunit biogenesis and cytosol, nucleolus localization
	0.568070644839936	CAGL0L05170g		Ortholog(s) have role in ribosomal large subunit biogenesis, ribosomal small subunit biogenesis and cytosolic large ribosomal subunit, nucleolus localization	C2_08180C		Ortholog(s) have role in ribosomal large subunit biogenesis, ribosomal small subunit biogenesis and cytosolic large ribosomal subunit, nucleolus localization	YKL082C	RRP14	ribosome biosynthesis protein RRP14	Essential protein, constituent of 66S pre-ribosomal particles; interacts with proteins involved in ribosomal biogenesis and cell polarity; member of the SURF-6 family
	0.563753009114285	CAGL0I09240g		Ortholog(s) have N-terminal protein N-methyltransferase activity, role in N-terminal peptidyl-proline dimethylation, cytoplasmic translation, single-species biofilm formation on inanimate substrate and cytosol, nucleus localization	C7_00490C		Putative AdoMet-dependent proline methyltransferase; Hap43-induced; required for normal flow model biofilm growth; Spider biofilm repressed	YBR261C	TAE1	N-terminal protein methyltransferase|NTM1	AdoMet-dependent proline methyltransferase; catalyzes the dimethylation of ribosomal proteins Rpl12 and Rps25 at N-terminal proline residues; has a role in protein synthesis; fusion protein localizes to the cytoplasm
	0.561185132194699	CAGL0I02376g		Has domain(s) with predicted role in ribosomal small subunit biogenesis and 90S preribosome localization
	0.554679976569239	CAGL0K02090r
	0.554176047766843	CAGL0J11847r
	0.553973265115461	CAGL0M13915g		Ortholog(s) have role in cell-abiotic substrate adhesion and cytosol, nucleus localization	C4_02260C		Protein of unknown function; repressed by prostaglandins; Hap43-induced, Spider biofilm induced	YMR310C	YMR310C	putative methyltransferase	Putative methyltransferase; predicted to be involved in ribosome biogenesis; green fluorescent protein (GFP)-fusion protein localizes to the nucleus; not an essential gene; YMR310C has a paralog, YGR283C, that arose from the whole genome duplication
	0.543911089758487	CAGL0J11154g		Ortholog(s) have nucleolus, preribosome localization	C3_07300W	NOP13	Ortholog of S. cerevisiae Nop13; a nucleolar protein found in preribosomal complexes; Hap43-induced gene; rat catheter biofilm induced	YNL175C	NOP13		Nucleolar protein found in preribosomal complexes; contains an RNA recognition motif (RRM); relative distribution to the nucleolus increases upon DNA replication stress
	0.541809605429102	CAGL0L06314g		Ortholog(s) have role in ribosomal large subunit export from nucleus and cytosol, cytosolic large ribosomal subunit, nuclear envelope, nucleolus, nucleoplasm, preribosome, large subunit precursor localization	C1_03230C	ARX1	Putative ribosomal large subunit biogenesis protein; repressed in core stress response; repressed by prostaglandins	YDR101C	ARX1	putative hydrolase	Nuclear export factor for the ribosomal pre-60S subunit; shuttling factor which directly binds FG rich nucleoporins and facilities translocation through the nuclear pore complex; interacts directly with Alb1p; responsible for Tif6p recycling defects in the absence of Rei1; associated with the ribosomal export complex
	0.540544909068473	CAGL0A04257g		Ortholog(s) have sequence-specific DNA binding activity, role in regulation of transcription from RNA polymerase II promoter and Rpd3L-Expanded complex, cytoplasm localization				YBL054W	TOD6	PBF1	PAC motif binding protein involved in rRNA and ribosome biogenesis; subunit of the RPD3L histone deacetylase complex; Myb-like HTH transcription factor; hypophosphorylated by rapamycin treatment in a Sch9p-dependent manner; activated in stochastic pulses of nuclear localization
	0.533093632384899	CAGL0H03773g		Ortholog(s) have mRNA binding activity	CR_06120W	RPL7	Ribosomal protein L7; repressed upon phagocytosis by murine macrophages; Hap43-induced; rat catheter and Spider biofilm induced	YNL002C		RPL7	Nucleolar protein similar to large ribosomal subunit L7 proteins; constituent of 66S pre-ribosomal particles; plays an essential role in processing of precursors to the large ribosomal subunit RNAs; binds junction of ITS2 and ITS2-proximal stem between the 3' end of 5.8S rRNA and the 5' end of 25S rRNA
	0.529900052940713	CAGL0J05412g		Ortholog(s) have mRNA binding activity and role in ascospore formation, conjugation with cellular fusion, ribosomal large subunit assembly, ribosomal subunit export from nucleus	C6_02230W		Putative GTPase; role in 60S ribosomal subunit biogenesis; Spider biofilm induced	YGL099W	LSG1	putative GTPase LSG1|KRE35	Putative GTPase involved in 60S ribosomal subunit biogenesis; required for the release of Nmd3p from 60S subunits in the cytoplasm
	0.52330619306972	CAGL0H02189g		Ortholog(s) have role in ribosomal small subunit biogenesis and nucleolus, ribosome localization	CR_01710W		Putative nucleolar protein; implicated in ribosome biogenesis; rat catheter biofilm repressed	YMR269W	TMA23	YMR268W-A	Nucleolar protein implicated in ribosome biogenesis; deletion extends chronological lifespan
	0.515219058806919	CAGL0I09350g		Ortholog(s) have sequence-specific DNA binding activity and role in budding cell bud growth, mitotic cell cycle, nucleocytoplasmic transport, ribosomal large subunit biogenesis	C1_05060W	REI1	Putative cytoplasmic pre-60S factor; Hap43-induced; repressed by prostaglandins	YBR267W	REI1		Cytoplasmic pre-60S factor; required for the correct recycling of shuttling factors Alb1, Arx1 and Tif6 at the end of the ribosomal large subunit biogenesis; involved in bud growth in the mitotic signaling network
	0.512998422641608	CAGL0D02838g		Ortholog(s) have role in hyphal growth, ribosomal large subunit biogenesis, ribosomal large subunit export from nucleus, single-species biofilm formation on inanimate substrate	C5_02120C	RIX7	Putative ATPase of the AAA family; role in ribosomal subunit export from the nucleus; mutation impairs hyphal growth and biofilm formation	YLL034C	RIX7	putative AAA family ATPase RIX7	Putative ATPase of the AAA family; required for export of pre-ribosomal large subunits from the nucleus; distributed between the nucleolus, nucleoplasm, and nuclear periphery depending on growth conditions
	0.511569501655905	CAGL0L08756g		Ortholog(s) have mRNA binding activity and 90S preribosome, cytoplasm, mitotic spindle pole body, nucleolus localization	C7_01030C		Ortholog(s) have mRNA binding activity and 90S preribosome, cytoplasm, mitotic spindle pole body, nucleolus localization	YPL012W	RRP12	mRNA-binding protein RRP12	Protein required for export of the ribosomal subunits; associates with the RNA components of the pre-ribosomes; has a role in nuclear import in association with Pse1p; also plays a role in the cell cycle and the DNA damage response; contains HEAT-repeats
	0.509892278672173	CAGL0A04532r
	0.508897908152204	CAGL0I03366g		Ortholog(s) have ATP binding, nucleoside-triphosphatase activity	C1_00340W	HBR1	Essential protein involved in regulation of MTL gene expression; hemoglobin-regulated inhibitor of white-opaque switching, may affect survival in host; activator of MTLalpha1 and MTLalpha2; transcript activated by hemoglobin	YDL166C	FAP7	nucleoside-triphosphatase	Essential NTPase required for small ribosome subunit synthesis; mediates processing of the 20S pre-rRNA at site D in the cytoplasm but associates only transiently with 43S preribosomes via Rps14p; complex with Rps14 is conserved between humans, yeast, and arches; may be the endonuclease for site D; depletion leads to accumulation of pre-40S ribosomes in 80S-like ribosomes; human TAF9 functionally…
Intracellular Traffic	0.53283915513933	CAGL0A00627g		Ortholog(s) have role in ER to Golgi vesicle-mediated transport and endoplasmic reticulum, mitochondrion localization				YGL002W	ERP6		Member of the p24 family involved in ER to Golgi transport; similar to Emp24p and Erv25p; the authentic, non-tagged protein is detected in highly purified mitochondria in high-throughput studies; ERP6 has a paralog, ERP1, that arose from the whole genome duplication
	-0.510664278558783	CAGL0J08118g		Ortholog(s) have role in late endosome to vacuole transport via multivesicular body sorting pathway and Golgi apparatus, cytosol, endosome, nucleus localization	C3_00540C	IST1	Protein with a positive role in the multivesicular body sorting pathway; rat catheter biofilm repressed	YNL265C	IST1		Protein with positive role in the multivesicular body sorting pathway; functions and forms a complex with Did2p; recruitment to endosomes is mediated by the Vps2p-Vps24p subcomplex of ESCRT-III; also interacts with Vps4p
	-0.548398963889851	CAGL0B01925g		Ortholog(s) have protein serine/threonine kinase activity, role in exocytosis, protein autophosphorylation and cytoplasmic side of plasma membrane localization				YDR122W	KIN1	serine/threonine protein kinase KIN1	Serine/threonine protein kinase involved in regulation of exocytosis; localizes to the cytoplasmic face of the plasma membrane; KIN1 has a paralog, KIN2, that arose from the whole genome duplication
	-0.56853595035654	CAGL0L08140g		Ortholog(s) have role in fungal-type cell wall organization, intracellular protein transport, response to pH and cytosol, extrinsic component of membrane, fungal-type vacuole membrane, mitochondrion localization	C1_06520C	BPH1	Ortholog of S. cerevisiae Bph1; a putative ortholog of human Chediak-Higashi syndrome protein and murine beige gene implicated in disease syndromes involving defective lysosomal trafficking; mutant is viable	YCR032W	BPH1		Protein homologous to Chediak-Higashi syndrome and Beige proteins; both of which are implicated in disease syndromes in human and mouse, respectively, due to defective lysosomal trafficking; mutant phenotype and genetic interactions suggest a role in protein sorting
	-0.625984648878028	CAGL0I07887g		Ortholog(s) have protein binding, bridging activity and role in CVT pathway, ER-associated ubiquitin-dependent protein catabolic process, protein complex localization, protein processing, vesicle organization				YOL082W	ATG19	CVT19	Receptor protein for the cytoplasm-to-vacuole targeting (Cvt) pathway; delivers cargo proteins aminopeptidase I (Ape1p) and alpha-mannosidase (Ams1p) to the phagophore assembly site for packaging into Cvt vesicles; interaction with Atg19p during the Cvt pathway requires phosphorylation by Hrr25p
	-1.07160417815292	CAGL0L13244g		Ortholog(s) have glycoprotein binding activity, role in ER to Golgi vesicle-mediated transport and ER to Golgi transport vesicle, Golgi membrane, endoplasmic reticulum localization	CR_07180W	EMP46	Protein similar to S. cerevisiae Emp46, an integral membrane component of ER-derived COPII-coated vesicles; functions in ER to Golgi transport; induced by alpha pheromone in SpiderM medium	YLR080W	EMP46		Integral membrane component of ER-derived COPII-coated vesicles; functions in ER to Golgi transport; EMP46 has a paralog, EMP47, that arose from the whole genome duplication
Pheromone Response	0.637542887803496	CAGL0G04433g		Ortholog(s) have endoplasmic reticulum localization	C7_01940C		Pheromone-regulated protein (Prm10) of S. cerevisiae; colony morphology-related gene regulation by Ssn6; induced by Mnl1 under weak acid stress; possibly essential gene, disruptants not obtained by UAU1 method; Spider biofilm induced	YJL108C	PRM10	pheromone-regulated protein PRM10	Pheromone-regulated protein; proposed to be involved in mating; predicted to have 5 transmembrane segments; induced by treatment with 8-methoxypsoralen and UVA irradiation
	-0.512906926355821	CAGL0G05720g		Ortholog(s) have protein kinase activity				YDL214C	PRR2	serine/threonine protein kinase PRR2	Serine/threonine protein kinase; inhibits pheromone induced signalling downstream of MAPK, possibly at the level of the Ste12p transcription factor; mutant has increased aneuploidy tolerance; PRR2 has a paralog, NPR1, that arose from the whole genome duplication
	-0.580104006040845	CAGL0M08184g	STE3	Putative a-factor pheromone receptor	C1_05620C	STE3	Protein similar to S. cerevisiae Ste3p, the receptor for a-factor mating pheromone; alpha mating-type-specific transcription	YKL178C	STE3	DAF2	Receptor for a factor pheromone; couples to MAP kinase cascade to mediate pheromone response; transcribed in alpha cells and required for mating by alpha cells, ligand bound receptors endocytosed and recycled to the plasma membrane; GPCR
Autophagy	-0.517976526575002	CAGL0G09999g		Ortholog(s) have protein kinase regulator activity and role in CVT pathway, activation of protein kinase activity, late nucleophagy, mitophagy, piecemeal microautophagy of nucleus, protein localization to pre-autophagosomal structure	CR_02910W		Predicted regulatory subunit of the Atg1 signaling complex; required for vesicle formation during autophagy and the cytoplasm-to-vacuole targeting (Cvt) pathway; Spider biofilm induced	YPR185W	ATG13	serine/threonine protein kinase regulatory subunit ATG13|APG13	Regulatory subunit of the Atg1p signaling complex; stimulates Atg1p kinase activity; required for vesicle formation during autophagy and the cytoplasm-to-vacuole targeting (Cvt) pathway; contains a HORMA domain required for autophagy and for recruitment of the phosphatidylinositol 3-kinase complex subunit Atg14p to the pre-autophagosomal structure
	-0.560609717475079	CAGL0A04675g		Ortholog(s) have protein tag activity	C1_05700W	AUT7	Putative autophagosome protein; macrophage/pseudohyphal-repressed; alternatively spliced intron in 5' UTR; Spider biofilm induced	YBL078C	ATG8	ubiquitin-like protein ATG8|AUT7|CVT5|APG8	Component of autophagosomes and Cvt vesicles; regulator of Atg1p, targets it to autophagosomes; binds the Atg1p-Atg13p complex, triggering its vacuolar degradation; unique ubiquitin-like protein whose conjugation target is lipid phosphatidylethanolamine (PE); Atg8p-PE is anchored to membranes, is involved in phagophore expansion, and may mediate membrane fusion during autophagosome formation; dec…
	-0.650868971999352	CAGL0L06006g		Ortholog(s) have protein serine/threonine kinase activity	C4_04450C	ATG1	Putative protein serine/threonine kinase; predicted role in vesicle formation in autophagy and the cytoplasm-to-vacuole targeting (Cvt) pathway; Spider biofilm induced	YGL180W	ATG1	serine/threonine protein kinase ATG1|APG1|CVT10|AUT3	Protein serine/threonine kinase; required for vesicle formation in autophagy and the cytoplasm-to-vacuole targeting (Cvt) pathway; structurally required for phagophore assembly site formation; during autophagy forms a complex with Atg13p and Atg17p; essential for cell cycle progression from G2/M to G1 under nitrogen starvation
	-0.810022763569291	CAGL0M01848g		Ortholog(s) have role in lysosomal microautophagy, signal transduction and EGO complex, fungal-type vacuole membrane, late endosome membrane localization				YBR077C	SLM4	GSE1|NIR1|EGO3	Component of the EGO and GSE complexes; essential for integrity and function of EGO; EGO is involved in the regulation of microautophagy and GSE is required for proper sorting of amino acid permease Gap1p; gene exhibits synthetic genetic interaction with MSS4
Vacuolar Morphology	0.547256541963738	CAGL0K09152g		Ortholog(s) have role in vacuolar protein processing, vacuole organization and lipid particle, mitochondrion localization	C2_04330C		S. cerevisiae ortholog Env9 has similarity to oxidoreductases and is proposed to have vacuolar functions, found in lipid particles; hyphal-induced expression	YOR246C	ENV9		Protein proposed to be involved in vacuolar functions; mutant shows defect in CPY processing and defects in vacuolar morphology; has similarity to oxidoreductases, found in lipid particles; required for replication of Brome mosaic virus in S. cerevisiae, a model system for studying replication of positive-strand RNA viruses in their natural hosts
Nucleic Acid Processing	0.821081613454907	CAGL0J01023g		Ortholog(s) have tRNA-specific adenosine deaminase activity, role in tRNA modification and cytoplasm, nucleus localization	C2_01510C		Ortholog(s) have tRNA-specific adenosine deaminase activity, role in tRNA modification and cytoplasm, nucleus localization	YJL035C	TAD2	tRNA(adenine34) deaminase	Subunit of tRNA-specific adenosine-34 deaminase; forms a heterodimer with Tad3p that converts adenosine to inosine at the wobble position of several tRNAs
	0.805891851227368	CAGL0M11110g		Ortholog(s) have role in rRNA processing and nucleolus, preribosome, large subunit precursor localization	C3_06760W		Ortholog(s) have role in rRNA processing and nucleolus, preribosome, large subunit precursor localization	YDR087C	RRP1		Essential evolutionarily conserved nucleolar protein; necessary for biogenesis of 60S ribosomal subunits and for processing of pre-rRNAs to mature rRNA; associated with several distinct 66S pre-ribosomal particles
	0.804561674290947	CAGL0M03487g		Ortholog(s) have RNA polymerase III activity, role in tRNA transcription from RNA polymerase III promoter and DNA-directed RNA polymerase III complex, cytosol, mitochondrion localization	C6_03210C		RNA polymerase III subunit; Spider biofilm induced	YNR003C	RPC34	DNA-directed RNA polymerase III subunit C34|C34	RNA polymerase III subunit C34; interacts with TFIIIB70 and is a key determinant in pol III recruitment by the preinitiation complex
	0.774879332141142	CAGL0K02233g		Ortholog(s) have role in maturation of 5.8S rRNA from tricistronic rRNA transcript (SSU-rRNA, 5.8S rRNA, LSU-rRNA), maturation of LSU-rRNA from tricistronic rRNA transcript (SSU-rRNA, 5.8S rRNA, LSU-rRNA)	C3_06380W	NSA2	Putative protein constituent of 66S pre-ribosomal particles; Hap43-induced; repressed by prostaglandins	YER126C	NSA2	rRNA-processing protein NSA2	Protein constituent of 66S pre-ribosomal particles; contributes to processing of the 27S pre-rRNA; recruited by ribosomal proteins L17, L35, and L37 to assembling ribosomes after 27SB pre-rRNA is generated, immediately preceding removal of ITS2
	0.757966084840879	CAGL0K02211g		Ortholog(s) have role in endonucleolytic cleavage in 5'-ETS of tricistronic rRNA transcript (SSU-rRNA, 5.8S rRNA and LSU-rRNA), more	C3_06370C		Ortholog(s) have role in endonucleolytic cleavage in 5'-ETS of tricistronic rRNA transcript (SSU-rRNA, 5.8S rRNA and LSU-rRNA), more	YER127W	LCP5		Essential protein involved in maturation of 18S rRNA; depletion leads to inhibited pre-rRNA processing and reduced polysome levels; localizes primarily to the nucleolus
	0.733162734805377	CAGL0K01551g		Ortholog(s) have role in assembly of large subunit precursor of preribosome, maturation of 5.8S rRNA from tricistronic rRNA transcript (SSU-rRNA, 5.8S rRNA and LSU-rRNA), more	C3_05160C		Ortholog(s) have role in assembly of large subunit precursor of preribosome, maturation of 5.8S rRNA from tricistronic rRNA transcript (SSU-rRNA, 5.8S rRNA and LSU-rRNA), more	YDL031W	DBP10	putative ATP-dependent RNA helicase DBP10	Putative ATP-dependent RNA helicase of the DEAD-box protein family; constituent of 66S pre-ribosomal particles; essential protein involved in ribosome biogenesis
	0.707434420754961	CAGL0K06215g		Ortholog(s) have snoRNA binding activity	C1_10880W		Putative U3 snoRNA-associated protein; Hap43-induced; transposon mutation affects filamentous growth; repressed by prostaglandins	YDR449C	UTP6	snoRNA-binding rRNA-processing protein UTP6	Nucleolar protein; component of the small subunit (SSU) processome containing the U3 snoRNA that is involved in processing of pre-18S rRNA
	0.70704592434339	CAGL0K09284g		Ortholog(s) have mRNA binding, snoRNA binding activity	CR_00800C	PWP2	Putative 90S pre-ribosomal component; repressed in core stress response; repressed by prostaglandins; physically interacts with TAP-tagged Nop1; Hap43-induced	YCR057C	PWP2	snoRNA-binding rRNA-processing protein PWP2|UTP1|YCR058C|YCR055C	Conserved 90S pre-ribosomal component; essential for proper endonucleolytic cleavage of the 35 S rRNA precursor at A0, A1, and A2 sites; contains eight WD-repeats; PWP2 deletion leads to defects in cell cycle and bud morphogenesis
	0.698522668744125	CAGL0J01265g		Ortholog(s) have snoRNA binding activity and role in cellular response to drug, maturation of SSU-rRNA from tricistronic rRNA transcript (SSU-rRNA, 5.8S rRNA, LSU-rRNA), positive regulation of transcription from RNA polymerase I promoter	C2_08670C	UTP15	Small subunit (SSU) processome component; mutation confers resistance to 5-fluorocytosine (5-FC); physically interacts with TAP-tagged Nop1p	YMR093W	UTP15	snoRNA-binding rRNA-processing protein UTP15	Nucleolar protein; component of the small subunit (SSU) processome containing the U3 snoRNA that is involved in processing of pre-18S rRNA
	0.680057299270198	CAGL0L03047g		Ortholog(s) have role in maturation of LSU-rRNA from tricistronic rRNA transcript (SSU-rRNA, 5.8S rRNA, LSU-rRNA) and nucleolus localization	C7_01200C	DBP7	Putative ATP-dependent DEAD-box RNA helicase; Hap43-induced; rat catheter biofilm induced	YKR024C	DBP7	putative ATP-dependent RNA helicase	Putative ATP-dependent RNA helicase of the DEAD-box family; involved in ribosomal biogenesis; required at post-transcriptional step for efficient retrotransposition; essential for growth under anaerobic conditions
	0.671487530318328	CAGL0E02673g		Ortholog(s) have small ribosomal subunit rRNA binding activity	CR_02420W		Ortholog(s) have small ribosomal subunit rRNA binding activity	YOR004W	UTP23	rRNA-binding ribosome biosynthesis protein UTP23	Component of the small subunit processome; involved in 40S ribosomal subunit biogenesis; interacts with snR30 and is required for dissociation of snR30 from large pre-ribosomal particles; has homology to PINc domain protein Fcf1p, although the PINc domain of Utp23p is not required for function; essential protein
	0.65968659293596	CAGL0J00869g		Ortholog(s) have RNA polymerase III activity, role in transcription initiation from RNA polymerase III type 2 promoter and DNA-directed RNA polymerase III complex, cytosol, nuclear chromatin localization
	0.659398904922976	CAGL0I04290g		Ortholog(s) have single-stranded telomeric DNA binding activity, role in regulation of translational fidelity, tRNA threonylcarbamoyladenosine modification, telomere maintenance and cytosol, nucleus localization	C7_00330C		Ortholog(s) have single-stranded telomeric DNA binding activity, role in regulation of translational fidelity, tRNA threonylcarbamoyladenosine modification, telomere maintenance and cytosol, nucleus localization	YGL169W	SUA5	threonylcarbamoyladenylate synthase	Protein involved in threonylcarbamoyl adenosine biosynthesis; Sua5p and Qri7p are necessary and sufficient for RNA t6A modification in vitro; null mutant lacks N6-threonylcarbamoyl adenosine (t6A) modification in the anticodon loop of ANN-decoding tRNA; member of conserved YrdC/Sua5 family; binds single-stranded telomeric DNA and null mutant has abnormal telomere length
	0.650912295900382	CAGL0J10252g		Ortholog(s) have rRNA primary transcript binding, single-stranded telomeric DNA binding, snoRNA binding activity, role in rRNA processing, ribosomal small subunit biogenesis and Mpp10 complex, small-subunit processome localization	CR_07950W	IMP4	Putative SSU processome component; Hap43-induced; repressed by prostaglandins; Spider biofilm induced	YNL075W	IMP4	snoRNA-binding rRNA-processing protein IMP4	Component of the SSU processome; SSU processome is required for pre-18S rRNA processing; interacts with Mpp10p; member of a superfamily of proteins that contain a sigma(70)-like motif and associate with RNAs
	0.647044746574275	CAGL0L10846g		Ortholog(s) have rRNA (guanine) methyltransferase activity	C5_01060C	BUD23	Putative methyltransferase; Hap43-induced; repressed by prostaglandins	YCR047C	BUD23	18S rRNA (guanine1575-N7)-methyltransferase	Methyltransferase that methylates residue G1575 of 18S rRNA; required for rRNA processing and nuclear export of 40S ribosomal subunits independently of methylation activity; diploid mutant displays random budding pattern; functional homolog of human WBSCR22
	0.646472272658679	CAGL0K09922g		Ortholog(s) have RNA binding, flap-structured DNA binding activity, role in nuclear-transcribed mRNA poly(A) tail shortening, positive regulation of endodeoxyribonuclease activity and P-body, cytosol, nucleus localization	C1_02850W		Ortholog(s) have RNA binding, flap-structured DNA binding activity, role in nuclear-transcribed mRNA poly(A) tail shortening, positive regulation of endodeoxyribonuclease activity and P-body, cytosol, nucleus localization	YOR359W	VTS1		Flap-structured DNA-binding and RNA-binding protein; stimulates deadenylation-dependent mRNA degradation mediated by the CCR4-NOT deadenylase complex; member of the Smaug (Smg) family of post-transcriptional regulators which bind RNA through a conserved sterile alpha motif (SAM) domain that interacts with Smg recognition element (SREs) containing transcripts; stimulates Dna2p endonuclease activity
	0.639902488252522	CAGL0E01925g		Ortholog(s) have tRNA (guanine-N2-)-methyltransferase activity, role in tRNA methylation and cytosol, nucleus, tRNA (m2G10) methyltransferase complex localization	C3_05140C		Ortholog(s) have tRNA (guanine-N2-)-methyltransferase activity, role in tRNA methylation and cytosol, nucleus, tRNA (m2G10) methyltransferase complex localization	YOL124C	TRM11	tRNA (guanine-N2-)-methyltransferase	Catalytic subunit of adoMet-dependent tRNA methyltransferase complex; required for the methylation of the guanosine nucleotide at position 10 (m2G10) in tRNAs; contains a THUMP domain and a methyltransferase domain; another complex member is Trm112p
	0.636243510234632	CAGL0B00792g		Ortholog(s) have mRNA binding activity, role in cytoplasmic translation and cytoplasmic stress granule, polysome localization				YCL037C	SRO9		Cytoplasmic RNA-binding protein; shuttles between nucleus and cytoplasm and is exported from the nucleus in an mRNA export-dependent manner; associates with translating ribosomes; involved in heme regulation of Hap1p as a component of the HMC complex, also involved in the organization of actin filaments; contains a La motif; SRO9 has a paralog, SLF1, that arose from the whole genome duplication
	0.631362616792874	CAGL0E03069g		Ortholog(s) have role in cellular response to drug, maturation of SSU-rRNA from tricistronic rRNA transcript (SSU-rRNA, 5.8S rRNA, LSU-rRNA) and 90S preribosome, cytosol, nucleolus, small-subunit processome localization	C7_03540C	ENP2	Putative nucleolar protein; essential; heterozygous mutation confers resistance to 5-fluorocytosine (5-FC), 5-fluorouracil (5-FU), and tubercidin (7-deazaadenosine); Hap43-induced; Spider biofilm induced	YGR145W	ENP2	ribosome biosynthesis protein ENP2	Component of the SSU; required for pre-18S rRNA processing, biogenesis of the small ribosomal subunit; interacts with U3 snoRNA, Mpp10p and Bfr2p; contains WD repeats, and has homology to Spb1p
	0.630193277068239	CAGL0F01925g		Ortholog(s) have role in endonucleolytic cleavage in 5'-ETS of tricistronic rRNA transcript (SSU-rRNA, 5.8S rRNA and LSU-rRNA), more	C3_07800C		Putative 35S rRNA processing protein; Hap43-induced; repressed by prostaglandins; Spider biofilm induced	YLR051C	FCF2		Nucleolar protein involved in the early steps of 35S rRNA processing; interacts with Faf1p; member of a transcriptionally co-regulated set of genes called the RRB regulon; essential gene
	0.629428745868378	CAGL0J01045g		Ortholog(s) have ATP-dependent RNA helicase activity, role in rRNA processing and cytosol, nucleus, small-subunit processome localization	C4_02830C	HCA4	Putative role in regulation of cell wall biogenesis; Hap43p-induced gene; possibly an essential gene, disruptants not obtained by UAU1 method; flow model and rat catheter biofilm induced	YJL033W	HCA4	RNA-dependent ATPase HCA4|ECM24|DBP4	DEAD box RNA helicase; component of the SSU; interacts with Bfr2p and Enp2p; high-copy number suppression of a U14 snoRNA processing mutant suggests an involvement in 18S rRNA synthesis
	0.62759518049424	CAGL0H10384g		Ortholog(s) have role in exonucleolytic trimming to generate mature 3'-end of 5.8S rRNA from tricistronic rRNA transcript (SSU-rRNA, 5.8S rRNA, LSU-rRNA), nuclear polyadenylation-dependent tRNA catabolic process, rRNA catabolic process	C4_03840C	RRP42	Putative exosome non-catalytic core component; involved in 3'-5' RNA processing; rat catheter biofilm induced	YDL111C	RRP42	exosome non-catalytic core subunit RRP42	Exosome non-catalytic core component; involved in 3'-5' RNA processing and degradation in both the nucleus and the cytoplasm; has similarity to E. coli RNase PH and to human hRrp42p (EXOSC7)
	0.622902065903001	CAGL0J11286g		Ortholog(s) have chromatin binding activity	C1_06760C		Putative U2 snRNP component; mutation confers hypersensitivity to 5-fluorocytosine (5-FC), 5-fluorouracil (5-FU), and tubercidin (7-deazaadenosine); Hap43-induced, Spider biofilm induced	YNL182C	IPI3	chromatin-binding/pre-rRNA-processing protein IPI3	Component of the Rix1 complex and pre-replicative complexes (pre-RCs); required for processing of ITS2 sequences from 35S pre-rRNA; component of the pre-60S ribosomal particle with the dynein-related AAA-type ATPase Mdn1p; required for pre-RC formation and maintenance during DNA replication licensing; highly conserved protein which contains several WD40 motifs; IPI3 is an essential gene; other me…
	0.621557728034302	CAGL0L03025g		Ortholog(s) have RNA polymerase III activity, role in tRNA transcription from RNA polymerase III promoter and DNA-directed RNA polymerase III complex, cytosol localization	C7_01210C		Predicted RNA polymerase III subunit C37; Spider biofilm induced	YKR025W	RPC37	DNA-directed RNA polymerase III subunit C37|C37	RNA polymerase III subunit C37
	0.617135444382938	CAGL0I07931g		Ortholog(s) have role in rRNA processing, ribosomal large subunit assembly and nucleolus localization	C1_12440W		Putative RNA exonuclease; induced in a ssr1 null mutant	YOL080C	REX4	putative 3'-5' exonuclease	Putative RNA exonuclease; possibly involved in pre-rRNA processing and ribosome assembly
	0.613256156656162	CAGL0D04180g		Ortholog(s) have U3 snoRNA binding, rRNA binding activity, role in maturation of SSU-rRNA from tricistronic rRNA transcript (SSU-rRNA, 5.8S rRNA, LSU-rRNA) and nucleolus, small-subunit processome localization	CR_06840W		Ortholog(s) have U3 snoRNA binding, rRNA binding activity, role in maturation of SSU-rRNA from tricistronic rRNA transcript (SSU-rRNA, 5.8S rRNA, LSU-rRNA) and nucleolus, small-subunit processome localization	YIL091C	UTP25	rRNA-binding ribosome biosynthesis protein UTP25	Nucleolar protein; required for 35S pre-RNA processing and 40S ribosomal subunit biogenesis
	0.606386188235285	CAGL0M11638g		Ortholog(s) have 3'-5'-exoribonuclease activity and role in U5 snRNA 3'-end processing, exonucleolytic trimming to generate mature 3'-end of 5.8S rRNA from tricistronic rRNA transcript (SSU-rRNA, 5.8S rRNA, LSU-rRNA)	C1_13200C	REX3	Ortholog(s) have 3'-5'-exoribonuclease activity and role in U5 snRNA 3'-end processing, exonucleolytic trimming to generate mature 3'-end of 5.8S rRNA from tricistronic rRNA transcript (SSU-rRNA, 5.8S rRNA, LSU-rRNA)	YLR107W	REX3	RNA exonuclease	RNA exonuclease; required for maturation of the RNA component of RNase MRP; functions redundantly with Rnh70p and Rex2p in processing of U5 snRNA and RNase P RNA; member of RNase D family of exonucleases
	0.606103412002946	CAGL0F08217g		Ortholog(s) have mRNA binding activity and cytoplasmic stress granule localization				YGR250C	YGR250C		Putative RNA binding protein; localizes to stress granules induced by glucose deprivation; interacts with Rbg1p in a two-hybrid assay; protein abundance increases in response to DNA replication stress
	0.605046262827395	CAGL0H09724g		Ortholog(s) have GTPase activity, mRNA binding activity and role in maturation of LSU-rRNA from tricistronic rRNA transcript (SSU-rRNA, 5.8S rRNA, LSU-rRNA), response to drug, ribosomal large subunit export from nucleus	C4_06210C		Putative GTPase; heterozygous null mutant exhibits resistance to parnafungin in the C. albicans fitness test; Hap43p-induced gene	YER006W	NUG1	RNA-binding GTPase NUG1	GTPase that associates with nuclear 60S pre-ribosomes; required for export of 60S ribosomal subunits from the nucleus
	0.599323777854457	CAGL0H02937g		Ortholog(s) have role in endonucleolytic cleavage in 5'-ETS of tricistronic rRNA transcript (SSU-rRNA, 5.8S rRNA and LSU-rRNA), more	C7_04190C	UTP18	Putative U3 snoRNA-associated protein; Hap43-induced; repressed in core stress response; physically interacts with TAP-tagged Nop1	YJL069C	UTP18		Small-subunit processome protein involved in pre-18S rRNA maturation; part of a subunit of the 90S preribosomal particle capable of interacting directly with the 5' ETS of the 35S pre-rRNA; contains WD40 repeats
	0.598758114944763	CAGL0I01826g		Ortholog(s) have snoRNA binding activity, role in rRNA processing, ribosomal small subunit biogenesis and Mpp10 complex, small-subunit processome localization	CR_00460C		Component of the SSU processome; predicted role in pre-18S rRNA processing; Spider biofilm induced	YHR148W	IMP3	snoRNA-binding rRNA-processing protein IMP3	Component of the SSU processome; SSU processome is required for pre-18S rRNA processing, essential protein that interacts with Mpp10p and mediates interactions of Imp4p and Mpp10p with U3 snoRNA
	0.597131527350345	CAGL0H01419g		Ortholog(s) have role in maturation of SSU-rRNA from tricistronic rRNA transcript (SSU-rRNA, 5.8S rRNA, LSU-rRNA) and 90S preribosome, nucleolus, small-subunit processome localization	CR_10470C		Ortholog(s) have role in maturation of SSU-rRNA from tricistronic rRNA transcript (SSU-rRNA, 5.8S rRNA, LSU-rRNA) and 90S preribosome, nucleolus, small-subunit processome localization	YDR299W	BFR2	rRNA-processing protein BFR2	Component of the SSU and 90S preribosomes; involved in pre-18S rRNA processing; binds to U3 snoRNA and Mpp10p; multicopy suppressor of sensitivity to Brefeldin A; expression is induced during lag phase and also by cold shock
	0.596050888224755	CAGL0K01969g		Has domain(s) with predicted transcription factor activity, RNA polymerase I upstream control element sequence-specific binding activity and role in transcription from RNA polymerase I promoter
	0.595241840955649	CAGL0C01639g		Ortholog(s) have snoRNA binding activity	C7_03700C	ENP1	Protein required for pre-rRNA processing and 40S ribosomal subunit synthesis; associated with U3 and U14 snoRNAs; transposon mutation affects filamentous growth; repressed by prostaglandins; Spider biofilm induced	YBR247C	ENP1	snoRNA-binding rRNA-processing protein ENP1|MEG1	Protein associated with U3 and U14 snoRNAs; required for pre-rRNA processing and 40S ribosomal subunit synthesis; localized in the nucleus and concentrated in the nucleolus; human BYSL functionally complements the heat sensitivity of an enp1 ts mutant
	0.594684448623728	CAGL0I02354g		Ortholog(s) have ATP-dependent RNA helicase activity	CR_05630W	DBP8	Protein similar to S. cerevisiae Dbp8p, an ATP-dependent helicase involved in rRNA processing; oxidative stress-repressed via Cap1p; flucytosine repressed; likely to be essential for growth, based on insertional mutagenesis	YHR169W	DBP8	ATP-dependent RNA helicase DBP8	ATPase, putative RNA helicase of the DEAD-box family; component of 90S preribosome complex involved in production of 18S rRNA and assembly of 40S small ribosomal subunit; ATPase activity stimulated by association with Esf2p
	0.593938730440037	CAGL0L03846g		Ortholog(s) have ATP-dependent RNA helicase activity	CR_02530W	DBP2	Putative DEAD-box family ATP-dependent RNA helicase; flucytosine induced; repressed in core stress response	YNL112W	DBP2	DEAD-box ATP-dependent RNA helicase DBP2	ATP-dependent RNA helicase of the DEAD-box protein family; has strong preference for dsRNA; interacts with YRA1; required for assembly of Yra1p, Nab2p and Mex67p onto mRNA and formation of nuclear mRNP; involved in mRNA decay and rRNA processing; may be involved in suppression of transcription from cryptic initiation sites
	0.592602720483373	CAGL0J09460g		Ortholog(s) have polynucleotide adenylyltransferase activity				YIL079C	AIR1	TRAMP complex RNA-binding subunit	Zinc knuckle protein; involved in nuclear RNA processing and degradation as a component of the TRAMP complex; stimulates the poly(A) polymerase activity of Pap2p in vitro; AIR1 has a paralog, AIR2, that arose from the whole genome duplication; although Air1p and Air2p are homologous TRAMP subunits, they have nonredundant roles in regulation of substrate specificity of the exosome
	0.592099600009685	CAGL0I03608g		Ortholog(s) have role in cellular response to drug, endonucleolytic cleavage in 5'-ETS of tricistronic rRNA transcript (SSU-rRNA, 5.8S rRNA and LSU-rRNA), more	C4_02790C	SAS10	Putative U3-containing small subunit processome complex subunit; Hap43p-induced gene; mutation confers resistance to 5-fluorocytosine (5-FC); repressed upon high-level peroxide stress	YDL153C	SAS10	rRNA-processing protein SAS10|UTP3	Subunit of U3-containing Small Subunit (SSU) processome complex; involved in production of 18S rRNA and assembly of small ribosomal subunit; disrupts silencing when overproduced; mutant has increased aneuploidy tolerance; essential gene
	0.592081378234823	CAGL0M04719g		Ortholog(s) have role in cleavage involved in rRNA processing, maturation of SSU-rRNA from tricistronic rRNA transcript (SSU-rRNA, 5.8S rRNA, LSU-rRNA) and 90S preribosome, nucleolus localization	CR_07030C		Putative 90S preribosome component; Hap43p-induced gene; possibly an essential gene, disruptants not obtained by UAU1 method	YOR287C	RRP36	rRNA-processing protein RRP36	Component of 90S preribosomes; involved in early cleavages of the 35S pre-rRNA and in production of the 40S ribosomal subunit
	0.588064009893859	CAGL0A00935g		Ortholog(s) have role in generation of catalytic spliceosome for first transesterification step, snoRNA splicing and U2-type spliceosomal complex localization	C2_00280C		Putative pre-mRNA-splicing factor; possibly an essential gene, disruptants not obtained by UAU1 method	YLR323C	CWC24	U2-type spliceosomal complex subunit CWC24	General splicing factor; required for stable U2 snRNP binding to primary transcripts; essential for the first step of splicing; component of the pre-catalytic spliceosome complex containing Cef1p; similar to S. pombe Cwf24p
	0.586620254214361	CAGL0M01056g		Ortholog(s) have role in endonucleolytic cleavage in 5'-ETS of tricistronic rRNA transcript (SSU-rRNA, 5.8S rRNA and LSU-rRNA), more	C5_03920C		Putative rRNA processing protein; Spider biofilm induced	YDR339C	FCF1	rRNA-processing protein FCF1|UTP24	Putative PINc domain nuclease; required for early cleavages of 35S pre-rRNA and maturation of 18S rRNA; component of the SSU (small subunit) processome involved in 40S ribosomal subunit biogenesis; copurifies with Faf1p
	0.583868617723176	CAGL0I07975g		Ortholog(s) have 5S rRNA binding, rRNA primary transcript binding activity	C1_12310C	CSI2	Putative 66S pre-ribosomal particle component; Hap43-induced; essential for growth; transposon mutation affects filamentous growth; Spider biofilm induced	YOL077C	BRX1		Nucleolar protein; constituent of 66S pre-ribosomal particles; depletion leads to defects in rRNA processing and a block in the assembly of large ribosomal subunits; possesses a sigma(70)-like RNA-binding motif
	0.582887095428851	CAGL0M07678g		Ortholog(s) have role in maturation of SSU-rRNA and 90S preribosome, nucleolus localization	CR_00680W	BUD22	Protein with a predicted role in 18S rRNA maturation and small ribosomal subunit biogenesis; repressed in core stress response; repressed by prostaglandins	YMR014W	BUD22		Protein required for rRNA maturation and ribosomal subunit biogenesis; required for 18S rRNA maturation; also required for small ribosomal subunit biogenesis; cosediments with pre-ribosomal particles; mutation decreases efficiency of +1 Ty1 frameshifting and transposition, and affects budding pattern
	0.578355250770832	CAGL0C00737g		Ortholog(s) have snoRNA binding activity	C5_02550C	UTP13	Putative U3 snoRNA-associated protein; Hap43-induced; repressed in core stress response; physically interacts with TAP-tagged Nop1	YLR222C	UTP13		Nucleolar protein; component of the small subunit (SSU) processome containing the U3 snoRNA that is involved in processing of pre-18S rRNA
	0.572703598867488	CAGL0I07667g		Ortholog(s) have tRNA (guanine(9)-N(1))-methyltransferase activity, role in tRNA N1-guanine methylation and cytoplasm, nucleolus localization	C2_06480W		Ortholog(s) have tRNA (guanine(9)-N(1))-methyltransferase activity, role in tRNA N1-guanine methylation and cytoplasm, nucleolus localization	YOL093W	TRM10	tRNA (guanine(9)-N(1))-methyltransferase	tRNA methyltransferase; methylates the N-1 position of guanine at position 9 in tRNAs; protein abundance increases in response to DNA replication stress; member of the SPOUT (SpoU-TrmD) methyltransferase family; human ortholog TRMT10A plays a role in the pathogenesis of microcephaly and early onset diabetes; an 18-mer originates from the TRM10 locus; genetic analysis shows the 18-mer is the trans…
	0.572114263563631	CAGL0J03344g		Ortholog(s) have role in endonucleolytic cleavage in 5'-ETS of tricistronic rRNA transcript (SSU-rRNA, 5.8S rRNA and LSU-rRNA), more	C1_09710C		Ortholog(s) have role in endonucleolytic cleavage in 5'-ETS of tricistronic rRNA transcript (SSU-rRNA, 5.8S rRNA and LSU-rRNA), more	YER082C	UTP7	KRE31	Nucleolar protein; component of the small subunit (SSU) processome containing the U3 snoRNA that is involved in processing of pre-18S rRNA
	0.570988915372619	CAGL0F00561g		Ortholog(s) have RNA polymerase I activity, RNA polymerase II sequence-specific DNA binding transcription factor binding activity	C2_07300C	RPA12	Putative DNA-directed RNA polymerase I; induced upon adherence to polystyrene	YJR063W	RPA12	DNA-directed RNA polymerase I core subunit RPA12|A12.2|RRN4	RNA polymerase I subunit A12.2; contains two zinc binding domains, and the N terminal domain is responsible for anchoring to the RNA pol I complex; physically interacts with transcriptional activator Msn4p, to regulate transcription of AYR1, a gene involved in lipid metabolism
	0.567979962713477	CAGL0F04983g		Ortholog(s) have ATP-dependent DNA helicase activity, ATP-dependent DNA/RNA helicase activity, ATP-dependent RNA helicase activity, mRNA binding activity	C6_01890C		Putative DEAD-box helicase; Hap43-induced; Spider biofilm induced	YLR276C	DBP9	ATP-dependent DNA/RNA helicase	DEAD-box protein required for 27S rRNA processing; exhibits DNA, RNA and DNA/RNA helicase activities; ATPase activity shows preference for DNA over RNA; DNA helicase activity abolished by mutation in RNA-binding domain
	0.567624480929676	CAGL0D03740g		Ortholog(s) have RNA binding, ribonuclease MRP activity, ribonuclease P activity	C1_03800W	RPP1	Putative ortholog of S. cerevisiae Rpp1; subunit of both RNase MRP and nuclear RNase P; rat catheter and Spider biofilm induced	YHR062C	RPP1	RNA-binding RNA processing protein RPP1	Subunit of both RNase MRP and nuclear RNase P; RNase MRP cleaves pre-rRNA, while nuclear RNase P cleaves tRNA precursors to generate mature 5' ends and facilitates turnover of nuclear RNAs; relocalizes to the cytosol in response to hypoxia
	0.567566018491045	CAGL0M01430g		Ortholog(s) have role in maturation of SSU-rRNA from tricistronic rRNA transcript (SSU-rRNA, 5.8S rRNA, LSU-rRNA), positive regulation of transcription from RNA polymerase I promoter	C3_02130W	UTP4	Putative U3 snoRNA-associated protein; Hap43-induced; physically interacts with TAP-tagged Nop1; Spider biofilm induced	YDR324C	UTP4		Subunit of U3-containing 90S preribosome and SSU processome complexes; involved in production of 18S rRNA and assembly of small ribosomal subunit; member of t-Utp subcomplex involved with transcription of 35S rRNA transcript; Small Subunit processome is also known as SSU processome
	0.566476177622791	CAGL0I06006g		Ortholog(s) have RNA polymerase I activity and role in transcription elongation from RNA polymerase I promoter, transcription of nuclear large rRNA transcript from RNA polymerase I promoter	C1_10260C	RPA34	Putative RNA polymerase I subunit; rat catheter biofilm induced	YJL148W	RPA34	DNA-directed RNA polymerase I subunit RPA34|CST21|A34.5	RNA polymerase I subunit A34.5; essential for nucleolar assembly and for high polymerase loading rate; nucleolar localization depends on Rpa49p
	0.565873858930879	CAGL0I05588g		Ortholog(s) have tRNA dihydrouridine synthase activity, role in tRNA modification and cytoplasm, nucleus localization	C2_09890W	SMM1	Putative dihydrouridine synthase; Hap43-induced gene; rat catheter biofilm induced; Spider biofilm induced	YNR015W	SMM1	DUS2	Dihydrouridine synthase; member of a family of dihydrouridine synthases including Dus1p, Smm1p, Dus3p, and Dus4p; modifies uridine residues at position 20 of cytoplasmic tRNAs
	0.565809352685013	CAGL0D03410g		Ortholog(s) have RNA polymerase I CORE element sequence-specific DNA binding, TBP-class protein binding activity and role in transcription of nuclear large rRNA transcript from RNA polymerase I promoter	C2_02630W		Putative transcription factor component of the core factor (CF) rDNA transcription factor complex; Spider biofilm induced	YJL025W	RRN7		Component of the core factor (CF) rDNA transcription factor complex; CF is required for transcription of 35S rRNA genes by RNA polymerase I and is composed of Rrn6p, Rrn7p, and Rrn11p
	0.563775009830016	CAGL0F01023g		Ortholog(s) have role in maturation of LSU-rRNA from tricistronic rRNA transcript (SSU-rRNA, 5.8S rRNA, LSU-rRNA) and nucleolus, preribosome, large subunit precursor localization	C2_04120C		Ortholog(s) have role in maturation of LSU-rRNA from tricistronic rRNA transcript (SSU-rRNA, 5.8S rRNA, LSU-rRNA) and nucleolus, preribosome, large subunit precursor localization	YOL041C	NOP12		Nucleolar protein involved in pre-25S rRNA processing; also involved in biogenesis of large 60S ribosomal subunit; contains an RNA recognition motif (RRM); binds to Ebp2; similar to Nop13p and Nsr1p
	0.562113694199879	CAGL0B01232g	EMG1	Ortholog(s) have rRNA (pseudouridine) methyltransferase activity	C1_11380W	NEP1	Ortholog(s) have rRNA (pseudouridine) methyltransferase activity	YLR186W	EMG1	18S rRNA pseudouridine methyltransferase|NEP1	Methyltransferase for rRNA; methylates pseudouridine 18S rRNA residue 1191; member of the SPOUT methyltransferase family; required for maturation of 18S rRNA and for 40S ribosomal subunit production independent of methyltransferase activity; forms homodimers; human ortholog is mutated in Bowen-Conradi syndrome, and equivalent yeast mutation affects Emg1p dimerization and localization but not meth…
	0.559210944121766	CAGL0E03245g		Ortholog(s) have mRNA binding, nuclear localization sequence binding, single-stranded telomeric DNA binding activity and role in single-species biofilm formation on inanimate substrate	C1_00160C		Putative nucleolar protein with a predicted role in pre-rRNA processing and ribosome biogenesis; repressed by nitric oxide; required for flow model biofilm formation; Spider biofilm repressed	YGR159C	NSR1	SHE5	Nucleolar protein that binds nuclear localization sequences; required for pre-rRNA processing and ribosome biogenesis; binds to single stranded telomeric DNA and mRNA; methylated by Hmt1p; interaction with Top1p and nucleolar localization are negatively regulated by polyphosphorylation
	0.55671763032683	CAGL0G02783g		Ortholog(s) have unfolded protein binding activity, role in box H/ACA snoRNP assembly and cytosol, nucleoplasm localization	C2_05830C		Putative chaperone protein; role in the assembly of box H/ACA snoRNPs and thus for pre-rRNA processing; Spider biofilm induced	YIL104C	SHQ1	Hsp90 cochaperone SHQ1	Chaperone protein; required for the assembly of box H/ACA snoRNPs and thus for pre-rRNA processing; functions as an RNA mimic; forms a complex with Naf1p and interacts with H/ACA snoRNP components Nhp2p and Cbf5p; homology with known Hsp90p cochaperones; relocalizes to the cytosol in response to hypoxia
	0.556597944276727	CAGL0D00880g		Ortholog(s) have ribonucleoprotein complex binding activity and role in endonucleolytic cleavage to generate mature 3'-end of SSU-rRNA from (SSU-rRNA, 5.8S rRNA, LSU-rRNA)	CR_08490W	TSR1	Component of 20S pre-rRNA processing unit; repressed by prostaglandins	YDL060W	TSR1		Protein required for processing of 20S pre-rRNA in the cytoplasm; associates with pre-40S ribosomal particles; inhibits the premature association of 60S subunits with assembling 40S subunits in the cytoplasm; similar to Bms1p; relocalizes from nucleus to cytoplasm upon DNA replication stress
	0.554139792329293	CAGL0J07766g		Ortholog(s) have RNA polymerase I activity and role in regulation of cell size, transcription elongation from RNA polymerase I promoter, transcription of nuclear large rRNA transcript from RNA polymerase I promoter	C2_01070W		Ortholog(s) have RNA polymerase I activity and role in regulation of cell size, transcription elongation from RNA polymerase I promoter, transcription of nuclear large rRNA transcript from RNA polymerase I promoter	YNL248C	RPA49	DNA-directed RNA polymerase I subunit RPA49|A49	RNA polymerase I subunit A49; essential for nucleolar assembly and for high polymerase loading rate; required for nucleolar localization of Rpa34p
	0.550652508404174	CAGL0D05588g		Ortholog(s) have mRNA binding activity, role in maturation of SSU-rRNA from tricistronic rRNA transcript (SSU-rRNA, 5.8S rRNA, LSU-rRNA) and 90S preribosome, mitotic spindle, nucleolus, small-subunit processome localization	C3_00560C	SOF1	Putative protein with a predicted role in 40S ribosomal subunit biogenesis; rat catheter biofilm induced	YLL011W	SOF1	rRNA-processing protein SOF1	Protein required for biogenesis of 40S (small) ribosomal subunit; has similarity to the beta subunit of trimeric G-proteins and the splicing factor Prp4p; essential gene
	0.549096969958537	CAGL0A03674g		Ortholog(s) have rRNA (adenine) methyltransferase activity and nucleolus localization	C2_05080C		Predicted nucleolar S-adenosylmethionine-dependent rRNA methyltransferase; Spider biofilm induced	YBR141C	BMT2	25S rRNA (adenine2142-N1)-methyltransferase	Nucleolar S-adenosylmethionine-dependent rRNA methyltransferase; methylates adenine (m1A) of the large subunit (LSU) rRNA at position 2142; belongs to Rossmann fold superfamily; green fluorescent protein (GFP)-fusion protein localizes to the nucleolus; YBR141C is not an essential gene
	0.547476222583079	CAGL0D04884g		Ortholog(s) have snoRNA binding activity, role in cellular response to drug and 90S preribosome, box C/D snoRNP complex, small-subunit processome localization	CR_02710W	RRP9	Ribosomal protein; mutation confers resistance to 5-fluorocytosine (5-FC), 5-fluorouracil (5-FU), and tubercidin (7-deazaadenosine); physically interacts with TAP-tagged Nop1; Hap43-induced; Spider biofilm induced	YPR137W	RRP9		Protein involved in pre-rRNA processing; associated with U3 snRNP; component of small ribosomal subunit (SSU) processosome; ortholog of the human U3-55k protein
	0.547338396307655	CAGL0K09460g		Putative nucleolar protein required for pre-rRNA processing; gene is downregulated in azole-resistant strain	CR_10410C		Putative nucleolar protein with a predicted role in pre-18S rRNA processing; Plc1p-regulated; Spider biofilm induced	YOR145C	PNO1	RRP20|DIM2	Essential nucleolar protein required for pre-18S rRNA processing; interacts with Dim1p, an 18S rRNA dimethyltransferase, and also with Nob1p, which is involved in proteasome biogenesis; contains a KH domain
	0.544564876447284	CAGL0B01463g		Ortholog(s) have RNA binding, manganese ion binding activity	C1_01160C		Exosome non-catalytic core component; involved in 3'-5' RNA processing and degradation in the nucleus and cytoplasm; Spider biofilm induced	YOL142W	RRP40	exosome non-catalytic core subunit RRP40|MTR14	Exosome non-catalytic core component; involved in 3'-5' RNA processing and degradation in both the nucleus and the cytoplasm; predicted to contain both S1 and KH RNA binding domains; mutations in the human homolog, EXOSC3, cause pontocerebellar hypoplasia with motor neuron degeneration
	0.543305688660159	CAGL0I10560g		Ortholog(s) have snoRNA binding, tRNA binding activity	C3_00330W	UTP8	Essential nucleolar protein; involved in tRNA export from the nucleus and ribosomal small subunit biogenesis; physically interacts with TAP-tagged Nop1; Spider biofilm induced	YGR128C	UTP8		Nucleolar protein required for export of tRNAs from the nucleus; also copurifies with the small subunit (SSU) processome containing the U3 snoRNA that is involved in processing of pre-18S rRNA
	0.542327019812108	CAGL0E01155g		Ortholog(s) have RNA polymerase I activity, role in regulation of cell size, transcription of nuclear large rRNA transcript from RNA polymerase I promoter and DNA-directed RNA polymerase I complex localization				YDR156W	RPA14	DNA-directed RNA polymerase I subunit RPA14|A14	RNA polymerase I subunit A14
	0.534420885958609	CAGL0H02057g		Ortholog(s) have box H/ACA snoRNA binding activity, role in cellular response to drug, snRNA pseudouridine synthesis and box H/ACA snoRNP complex localization	C1_11550W	GAR1	Putative H/ACA snoRNP pseudouridylase complex protein; mutation confers hypersensitivity to tubercidin (7-deazaadenosine); macrophage/pseudohyphal-induced; Spider biofilm repressed	YHR089C	GAR1	H/ACA snoRNP pseudouridylase subunit GAR1	Protein component of the H/ACA snoRNP pseudouridylase complex; involved in the modification and cleavage of the 18S pre-rRNA
	0.530745208358379	CAGL0L07678g		Putative essential 18S rRNA dimethylase; gene is downregulated in azole-resistant strain
	0.530529545914791	CAGL0I04730g	HMT1	Putative hnRNP arginine N-methyltransferase	C1_01030W	HMT1	Major type I protein arginine methyltransferase (PRMT); involved in asymmetric dimethylation of arginine residues; involved in nuclear export of Npl3p; Spider biofilm repressed	YBR034C	HMT1	protein-arginine omega-N methyltransferase HMT1|RMT1|ODP1|HCP1	Nuclear SAM-dependent mono- and asymmetric methyltransferase; modifies hnRNPs, including Npl3p and Hrp1p, affecting their activity and nuclear export; methylates U1 snRNP protein Snp1p, ribosomal protein Rps2p, and histones H3 and H4; interacts genetically with genes encoding components of Rpd3(L) and this interaction is important for Rpd3 recruitment to the subtelomeric region
	0.529425688136356	CAGL0F02541g		Ortholog(s) have role in cellular response to drug, maturation of SSU-rRNA from tricistronic rRNA transcript (SSU-rRNA, 5.8S rRNA, LSU-rRNA), positive regulation of transcription from RNA polymerase I promoter	CR_10240W	UTP5	Putative U3 snoRNA-associated protein; Hap43p-induced gene; mutation confers resistance to 5-fluorocytosine (5-FC), 5-fluorouracil (5-FU), and tubercidin (7-deazaadenosine); physically interacts with TAP-tagged Nop1p	YDR398W	UTP5		Subunit of U3-containing Small Subunit (SSU) processome complex; involved in production of 18S rRNA and assembly of small ribosomal subunit
	0.529291798596306	CAGL0M04587g		Ortholog(s) have rRNA primary transcript binding activity	C1_13360C	RMP1	Ortholog of Rmp1; subunit of RNase MRP subunit that processes pre-rRNA and has a role in cell cycle-regulated degradation of daughter cell-specific mRNAs; rat catheter and Spider biofilm induced	YLR145W	RMP1		Subunit of RNase MRP; RNase MRP processes pre-rRNA and has a role in cell cycle-regulated degradation of daughter cell-specific mRNAs; unlike most subunits, not shared between RNase MRP and nuclear RNase P
	0.529154543425428	CAGL0M03751g		Ortholog(s) have polynucleotide adenylyltransferase activity, ribosomal large subunit binding activity				YNL299W	TRF5	non-canonical poly(A) polymerase TRF5	Non-canonical poly(A) polymerase; involved in nuclear RNA degradation as a component of the TRAMP complex; catalyzes polyadenylation of hypomodified tRNAs, and snoRNA and rRNA precursors; overlapping but non-redundant functions with Pap2p
	0.527438213913418	CAGL0H02079g		Ortholog(s) have rRNA primary transcript binding activity	C4_03270W	RPF1	Putative nucleolar protein with a predicted role in the assembly and export of the large ribosomal subunit; essential for growth; rat catheter and Spider biofilm induced	YHR088W	RPF1	rRNA-binding ribosome biosynthesis protein RPF1	Protein involved in assembly and export of the large ribosomal subunit; nucleolar protein; constituent of 66S pre-ribosomal particles; contains a sigma(70)-like motif, which is thought to bind RNA
	0.526594778752522	CAGL0A04037g		Ortholog(s) have role in rRNA processing and cytosol, nucleolus localization	C4_01450W	PWP1	Putative rRNA processing protein; Hap43-induced; repressed in core stress response	YLR196W	PWP1	rRNA-processing protein PWP1	Protein with WD-40 repeats involved in rRNA processing; associates with trans-acting ribosome biogenesis factors; similar to beta-transducin superfamily
	0.526425581598303	CAGL0L03872g		Ortholog(s) have RNA polymerase I activity, RNA polymerase III activity and role in tRNA transcription from RNA polymerase III promoter, transcription from RNA polymerase I promoter	CR_02520W	RPC19	Putative RNA polymerases I and III subunit AC19; Hap43-induced; rat catheter biofilm induced	YNL113W	RPC19	DNA-directed RNA polymerase core subunit RPC19|AC19	RNA polymerase subunit AC19; common to RNA polymerases I and III
	0.524629802586886	CAGL0M06941g		Ortholog(s) have rRNA (cytosine-C5-)-methyltransferase activity, role in rRNA base methylation and nucleolus localization	CR_02030C		S. pombe ortholog SPAC2C4.06c is a predicted tRNA (cytosine-5-)-methyltransferase; Spider biofilm induced	YNL022C	RCM1	rRNA (cytosine-C5-)-methyltransferase RCM1	rRNA m5C methyltransferase; methylates cytosine at position 2278 of 25S rRNA while Nop2p methylates cytosine at position 2870; contains seven beta-strand methyltransferase motif; localized to the nucleolus; interacts with Trm112p; homolog of NSUN5A, a human gene which is deleted in Williams-Beuren Syndrome
	0.522831532235604	CAGL0C00759g		Ortholog(s) have transcription coactivator activity and role in chromatin silencing at telomere, positive regulation of ribosomal protein gene transcription from RNA polymerase II promoter				YLR223C	IFH1		Coactivator, regulates transcription of ribosomal protein (RP) genes; recruited to RP gene promoters during optimal growth conditions via Fhl1p; subunit of CURI, a complex that coordinates RP production and pre-rRNA processing; regulated by acetylation and phosphorylation at different growth states via TORC1 signaling; IFH1 has a paralog, CRF1, that arose from the whole genome duplication
	0.522055670411441	CAGL0M09977g		Ortholog(s) have mRNA binding, tRNA dihydrouridine synthase activity, role in tRNA modification and cytoplasm, nuclear periphery localization	C2_02420C		Protein of unknown function	YLR401C	DUS3	tRNA dihydrouridine synthase DUS3	Dihydrouridine synthase; member of a widespread family of conserved proteins including Smm1p, Dus1p, and Dus4p; contains a consensus oleate response element (ORE) in its promoter region; forms nuclear foci upon DNA replication stress
	0.517273379538053	CAGL0K10010g		Ortholog(s) have rRNA (adenine) methyltransferase activity and role in rRNA methylation, ribosomal large subunit biogenesis	C2_08480W	RRP8	Ribosomal protein; Hap43-induced; F-12/CO2 early biofilm and rat catheter biofilm induced	YDR083W	RRP8	25S rRNA (adenine645-N1)-methyltransferase	Nucleolar S-adenosylmethionine-dependent rRNA methyltransferase; methylates adenine (m1A) of the large subunit (LSU) rRNA at position 645; involved in pre-rRNA cleavage at site A2; mutation is synthetically lethal with a gar1 mutation; deletion disrupts telomere maintenance by influencing the expression of neighboring gene STN1
	0.515085213674651	CAGL0D05874g		Ortholog(s) have role in endonucleolytic cleavage in 5'-ETS of tricistronic rRNA transcript (SSU-rRNA, 5.8S rRNA and LSU-rRNA), more	C2_00070C	MPP10	Putative SSU processome and 90S preribosome component; repressed in core stress response; repressed by prostaglandins	YJR002W	MPP10	rRNA-processing protein MPP10	Component of the SSU processome and 90S preribosome; required for pre-18S rRNA processing, interacts with and controls the stability of Imp3p and Imp4p, essential for viability; similar to human Mpp10p
	0.51295143635158	CAGL0L03916g		Has domain(s) with predicted nucleic acid binding activity
	0.511575292231902	CAGL0E05676g		Ortholog(s) have role in wybutosine biosynthetic process and endoplasmic reticulum localization	C6_02290C		Putative flavodoxin; similar to S. cerevisiae Tyw1, an iron-sulfur protein required for synthesis of wybutosine modified tRNA; predicted Kex2p substrate; Spider biofilm induced	YPL207W	TYW1	putative tRNA 4-demethylwyosine synthase	Iron-sulfer protein required for synthesis of Wybutosine modified tRNA; Wybutosine is a modified guanosine found at the 3'-position adjacent to the anticodon of phenylalanine tRNA which supports reading frame maintenance by stabilizing codon-anticodon interactions; induction by Yap5p in response to iron provides protection from high iron toxicity; overexpression results in increased cellular iron
	0.509924792663201	CAGL0G05742g		Ortholog(s) have rRNA binding, snoRNA binding activity, role in ribosomal small subunit biogenesis and 90S preribosome, nucleolus, preribosome, large subunit precursor, preribosome, small subunit precursor localization	C1_06740C	NOP6	Putative ortholog of S. cerevisiae Nop6; role in ribosomal small subunit biogenesis; Spider biofilm induced	YDL213C	NOP6		rRNA-binding protein required for 40S ribosomal subunit biogenesis; contains an RNA recognition motif (RRM); hydrophilin essential to overcome the stress of the desiccation-rehydration process; NOP6 may be a fungal-specific gene as no homologs have been yet identified in higher eukaryotes
	0.509546442139057	CAGL0E00979g		Ortholog(s) have tRNA (guanine-N7-)-methyltransferase activity, role in tRNA methylation and cytosol, nucleus, tRNA methyltransferase complex localization	C7_02340C		Ortholog(s) have tRNA (guanine-N7-)-methyltransferase activity, role in tRNA methylation and cytosol, nucleus, tRNA methyltransferase complex localization	YDR165W	TRM82		Catalytic subunit of a tRNA methyltransferase complex; Trm8p and Trm82p comprise an enzyme that catalyzes a methyl-transfer from S-adenosyl-l-methionine to the N(7) atom of guanine at position 46 in tRNA; Trm8 lacks catalytic activity if not bound to Trm82p; relocalizes to the cytosol in response to hypoxia; mutation in human ortholog WDR4 causes microcephalic primordial dwarfism
	0.509248090025152	CAGL0J01848g		Ortholog(s) have RNA polymerase I activity, role in transcription of nuclear large rRNA transcript from RNA polymerase I promoter and DNA-directed RNA polymerase I complex localization	C7_00570W	RPA135	Putative RNA polymerase I subunit A135; repressed by prostaglandins	YPR010C	RPA135	DNA-directed RNA polymerase I core subunit RPA135|A135|SRP3|RRN2|RPA2	RNA polymerase I second largest subunit A135
	0.508524789578406	CAGL0M09845g		Ortholog(s) have role in rRNA processing and Pwp2p-containing subcomplex of 90S preribosome, cell division site, cytosol, mitotic spindle, mitotic spindle pole body, small-subunit processome localization	C2_02430W	UTP21	Putative U3 snoRNP protein; Hap43-induce; physically interacts with TAP-tagged Nop1; Spider biofilm induced	YLR409C	UTP21	rRNA-processing protein UTP21	Subunit of U3-containing 90S preribosome and SSU processome complexes; involved in production of 18S rRNA and assembly of small ribosomal subunit; synthetic defect with STI1 Hsp90 cochaperone; human homolog linked to glaucoma; Small Subunit processome is also known as SSU processome
	0.508209767187448	CAGL0L03806g		Ortholog(s) have rRNA binding activity, role in actomyosin contractile ring assembly, ribosomal large subunit biogenesis and nucleolus, preribosome, large subunit precursor localization	C7_00690W	NOP15	Nucleolar ribosome biogenesis factor; hyphal-induced expression; Hap43-induced; rat catheter biofilm induced	YNL110C	NOP15	rRNA-binding ribosome biosynthesis protein NOP15	Constituent of 66S pre-ribosomal particles; involved in 60S ribosomal subunit biogenesis; localizes to both nucleolus and cytoplasm
	0.507539628382469	CAGL0E05478g		Ortholog(s) have RNA polymerase I activity, role in transcription of nuclear large rRNA transcript from RNA polymerase I promoter and DNA-directed RNA polymerase I complex localization	CR_01950W		Ortholog(s) have RNA polymerase I activity, role in transcription of nuclear large rRNA transcript from RNA polymerase I promoter and DNA-directed RNA polymerase I complex, cytosol localization	YOR340C	RPA43	DNA-directed RNA polymerase I subunit RPA43|A43	RNA polymerase I subunit A43
	0.507117589905271	CAGL0J10010g		Ortholog(s) have tRNA (adenine-N1-)-methyltransferase activity, role in tRNA methylation and nucleus, tRNA (m1A) methyltransferase complex localization	CR_04160C		Ortholog(s) have tRNA (adenine-N1-)-methyltransferase activity, role in tRNA methylation and nucleus, tRNA (m1A) methyltransferase complex localization	YNL062C	GCD10	tRNA 1-methyladenosine methyltransferase subunit GCD10|TRM6	Subunit of tRNA (1-methyladenosine) methyltransferase with Gcd14p; required for the modification of the adenine at position 58 in tRNAs, especially tRNAi-Met; first identified as a negative regulator of GCN4 expression
	0.506228843620445	CAGL0L04114g		Ortholog(s) have RNA binding activity, role in box H/ACA snoRNP assembly and nucleoplasm localization	CR_04110W		Putative RNA-binding protein; role in assembly of box H/ACA snoRNPs and thus pre-rRNA processing; Spider biofilm induced	YNL124W	NAF1	RNA-binding snoRNP assembly protein	RNA-binding protein required for the assembly of box H/ACA snoRNPs; thus required for pre-rRNA processing; forms a complex with Shq1p and interacts with H/ACA snoRNP components Nhp2p and Cbf5p; similar to Gar1p
	0.50567623665774	CAGL0G06248g		Ortholog(s) have role in maturation of 5.8S rRNA from tricistronic rRNA transcript (SSU-rRNA, 5.8S rRNA, LSU-rRNA), maturation of LSU-rRNA from tricistronic rRNA transcript (SSU-rRNA, 5.8S rRNA, LSU-rRNA)	C2_06360C	MAK16	Putative constituent of 66S pre-ribosomal particles; Hap43-induced; repressed by prostaglandins; Spider biofilm induced	YAL025C	MAK16	ribosome biosynthesis protein MAK16	Essential nuclear protein; constituent of 66S pre-ribosomal particles; required for maturation of 25S and 5.8S rRNAs; required for maintenance of M1 satellite double-stranded RNA of the L-A virus
	0.504990903182068	CAGL0L11176g		Ortholog(s) have oxidized purine nucleobase lesion DNA N-glycosylase activity and role in base-excision repair, AP site formation, error-free translesion synthesis, telomere maintenance via telomerase	C7_03910W	OGG1	Mitochondrial glycosylase/lyase; repairs oxidative damage to mitochondrial DNA, contributes to UVA resistance, role in base-excision repair; Spider biofilm induced	YML060W	OGG1	8-oxoguanine glycosylase OGG1	Nuclear and mitochondrial glycosylase/lyase; specifically excises 7,8-dihydro-8-oxoguanine residues located opposite cytosine or thymine residues in DNA, repairs oxidative damage to mitochondrial DNA, contributes to UVA resistance
	0.504694701373246	CAGL0B04169g		Ortholog(s) have mRNA binding, rRNA primary transcript binding activity	C3_02020W		Ortholog(s) have mRNA binding, rRNA primary transcript binding activity	YPR112C	MRD1	RNA-binding ribosome biosynthesis protein MRD1	Essential conserved small ribosomal subunit (40s) synthesis factor; component of the 90S preribosome; required for production of 18S rRNA and small ribosomal subunit; contains five consensus RNA-binding domains and binds to the pre-rRNA at two sites within the 18S region
	0.504330096970279	CAGL0M13519g		Ortholog(s) have ATP-dependent RNA helicase activity, RNA binding activity	C5_04750C	HAS1	Functional homolog of S. cerevisiae Has1p, which is a nucleolar protein of the DEAD-box ATP-dependent RNA helicase family that is involved in biogenesis of the ribosome, particularly the small (40S) subunit; caspofungin-downregulated	YMR290C	HAS1	ATP-dependent RNA helicase HAS1	ATP-dependent RNA helicase; involved in the biogenesis of 40S and 60S ribosome subunits; localizes to both the nuclear periphery and nucleolus; highly enriched in nuclear pore complex fractions; constituent of 66S pre-ribosomal particles
	0.502234772615458	CAGL0L00341g		Ortholog(s) have mRNA binding activity, role in nuclear division, rRNA processing, ribosomal large subunit biogenesis and mitotic spindle pole body, nuclear periphery, nucleolus, preribosome, large subunit precursor localization	C2_04570W		Ortholog(s) have mRNA binding activity, role in nuclear division, rRNA processing, ribosomal large subunit biogenesis and mitotic spindle pole body, nuclear periphery, nucleolus, preribosome, large subunit precursor localization	YKL172W	EBP2		Required for 25S rRNA maturation and 60S ribosomal subunit assembly; localizes to the nucleolus and in foci along nuclear periphery; constituent of 66S pre-ribosomal particles; cooperates with Rrs1p and Mps3p to mediate telomere clustering by binding Sir4p, but is not involved in telomere tethering
	0.501760911400396	CAGL0A02772g		Ortholog(s) have second spliceosomal transesterification activity and role in generation of catalytic spliceosome for second transesterification step, mRNA 3'-splice site recognition, mRNA branch site recognition	C1_12750C		Pre-mRNA splicing factor; important for catalytic step II of pre-mRNA splicing; possible role in cell cycle progression; Spider biofilm induced	YDR364C	CDC40	SLU4|SLT15|PRP17	Pre-mRNA splicing factor; important for catalytic step II of pre-mRNA splicing and plays a role in cell cycle progression, particularly at the G1/S phase transition; required for DNA synthesis during mitosis and meiosis; has WD repeats; thermosensitivity of the cdc40 null mutant is functionally complemented by a chimeric construct containing the N-terminal 156 amino acids of yeast Cdc40p fused to…
	0.500925141827435	CAGL0L04026g		Ortholog(s) have role in invasive growth in response to glucose limitation, protein urmylation, pseudohyphal growth, tRNA wobble position uridine thiolation and cytosol, nucleus localization	CR_03550W	NCS2	Putative cytosolic thiouridylase subunit; Spider biofilm induced	YNL119W	NCS2	TUC2	Protein required for uridine thiolation of Lys(UUU) and Glu(UUC) tRNAs; required for the thiolation of uridine at the wobble position of Lys(UUU) and Glu(UUC) tRNAs; has a role in urmylation and in invasive and pseudohyphal growth; inhibits replication of Brome mosaic virus in S. cerevisiae
	0.500195511925281	CAGL0J10890g		Ortholog(s) have rRNA binding activity, role in conjugation with cellular fusion, ribosomal large subunit assembly and nucleolus localization				YDR312W	SSF2	rRNA-binding ribosome biosynthesis protein	Protein required for ribosomal large subunit maturation; functionally redundant with Ssf1p; member of the Brix family; SSF2 has a paralog, SSF1, that arose from the whole genome duplication
	-0.511860280682009	CAGL0C03113g		Ortholog(s) have RNA 7-methylguanosine cap binding, exoribonuclease activator activity, m7G(5')pppN diphosphatase activity	C7_01190W		Ortholog(s) have RNA 7-methylguanosine cap binding, exoribonuclease activator activity, m7G(5')pppN diphosphatase activity	YLR270W	DCS1	5'-(N(7)-methyl 5'-triphosphoguanosine)-(mRNA) diphosphatase|DcpS	Non-essential hydrolase involved in mRNA decapping; activates Xrn1p; may function in a feedback mechanism to regulate deadenylation, contains pyrophosphatase activity and a HIT (histidine triad) motif; acts as inhibitor of neutral trehalase Nth1p; required for growth on glycerol medium; protein abundance increases in response to DNA replication stress; DCS1 has a paralog, DCS2, that arose from th…
	-0.540233192267254	CAGL0G09779g		Ortholog(s) have role in termination of RNA polymerase II transcription, exosome-dependent, termination of RNA polymerase II transcription, poly(A)-coupled and mRNA cleavage and polyadenylation specificity factor complex localization				YOR179C	SYC1	cleavage polyadenylation factor subunit SYC1	Subunit of the APT subcomplex of cleavage and polyadenylation factor; may have a role in 3' end formation of both polyadenylated and non-polyadenylated RNAs; SYC1 has a paralog, YSH1, that arose from the whole genome duplication
	-0.55880846688051	CAGL0E02695g	LIG4	DNA ligase IV; mutants show increased efficiency of gene targeting	C2_03030W	LIG4	DNA ligase; mRNA detected in yeast-form and pseudohyphal cells, induced upon hyphal induction; suppresses S. cerevisiae ime1-1 mutant IME2 transcription defect; required for wild-type filamentous growth and wild-type pathogenesis	YOR005C	DNL4	DNA ligase (ATP) DNL4|LIG4	DNA ligase required for nonhomologous end-joining (NHEJ); forms stable heterodimer with required cofactor Lif1p, interacts with Nej1p; involved in meiosis, not essential for vegetative growth; mutations in human ortholog lead to ligase IV syndrome and Dubowitz syndrome
	-0.562603183441129	CAGL0D00594g		Ortholog(s) have role in negative regulation of transcription from RNA polymerase I promoter and Rpd3L complex, Rpd3L-Expanded complex localization	C2_05370C	RXT3	Putative transcriptional repressor	YDL076C	RXT3		Component of the Rpd3L histone deacetylase complex; involved in histone deacetylation; protein abundance increases in response to DNA replication stress
	-0.604829363880537	CAGL0J06820g		Ortholog(s) have endoribonuclease activity, role in RNA catabolic process, apoptotic process, cell morphogenesis and cytosol, extracellular region, fungal-type vacuole localization	C5_04400W	RNY11	Ortholog(s) have endoribonuclease activity, role in RNA catabolic process, apoptotic process, cell morphogenesis and cytosol, extracellular region, fungal-type vacuole localization	YPL123C	RNY1	ribonuclease T2	Vacuolar RNase of the T(2) family; relocalizes to the cytosol where it cleaves tRNAs upon oxidative or stationary phase stress; required for tRNA-specific translational pausing suring oxidative stress; promotes apoptosis under stress conditions and this function is independent of Rny1p catalytic activity
	-0.615773109690797	CAGL0L04598g		Ortholog(s) have RNA 7-methylguanosine cap binding, m7G(5')pppN diphosphatase activity, role in cellular response to starvation, deadenylation-dependent decapping of nuclear-transcribed mRNA and P-body, cytosol, nucleus localization				YOR173W	DCS2	5'-(N(7)-methyl 5'-triphosphoguanosine)-(mRNA) diphosphatase	m(7)GpppX pyrophosphatase regulator; non-essential, stress induced regulatory protein; modulates m7G-oligoribonucleotide metabolism; inhibits Dcs1p; regulated by Msn2p, Msn4p, and the Ras-cAMP-cAPK signaling pathway; mutant has increased aneuploidy tolerance; DCS2 has a paralog, DCS1, that arose from the whole genome duplication
	-0.660827723442432	CAGL0H00759g		Has domain(s) with predicted ATP binding, ATP-dependent 3'-5' DNA helicase activity, ATP-dependent helicase activity, helicase activity, nucleic acid binding activity and role in DNA recombination, DNA repair, DNA replication
	-0.674564035568293	CAGL0K06083g		Ortholog(s) have DNA end binding activity, role in double-strand break repair via nonhomologous end joining, double-strand break repair via single-strand annealing and DNA ligase IV complex localization				YLR265C	NEJ1	LIF2	Protein involved in regulation of nonhomologous end joining; interacts with DNA ligase IV components Dnl4p and Lif1p; repressed by MAT heterozygosity; regulates cellular distribution of Lif1p
	-0.685976721391929	CAGL0J06908g		Ortholog(s) have mRNA binding activity, role in translational initiation and cytoplasm localization				YPL119C	DBP1	putative DEAD-box ATP-dependent RNA helicase DBP1|LPH8	Putative ATP-dependent RNA helicase of the DEAD-box protein family; mutants show reduced stability of the 40S ribosomal subunit scanning through 5' untranslated regions of mRNAs; protein abundance increases in response to DNA replication stress; DBP1 has a paralog, DED1, that arose from the whole genome duplication
	-0.702783050149288	CAGL0G05830g		Ortholog(s) have DNA binding activity				YHR146W	CRP1		Protein that binds to cruciform DNA structures; CRP1 has a paralog, MDG1, that arose from the whole genome duplication
Oxidative Stress Response	-0.602600877316586	CAGL0D04026g		Ortholog(s) have 4-aminobutyrate transaminase activity, pyridoxal phosphate binding activity and role in cellular amide catabolic process, gamma-aminobutyric acid catabolic process, glutamate metabolic process	C2_04190C	UGA1	Putative GABA transaminase; transcription regulated by Mig1 and Tup1; stationary phase enriched protein; rat catheter and Spider biofilm induced	YGR019W	UGA1	4-aminobutyrate transaminase	Gamma-aminobutyrate (GABA) transaminase; also known as 4-aminobutyrate aminotransferase; involved in the 4-aminobutyrate and glutamate degradation pathways; required for normal oxidative stress tolerance and nitrogen utilization; protein abundance increases in response to DNA replication stress
	-0.619484015345601	CAGL0H02585g		Ortholog(s) have glutamate decarboxylase activity, role in cellular response to oxidative stress, glutamate catabolic process and cytoplasm localization	C1_11660W	GAD1	Putative glutamate decarboxylase; alkaline, macrophage-downregulated gene; amphotericin B induced; induced by Mnl1 under weak acid stress; stationary phase enriched protein; rat catheter biofilm repressed	YMR250W	GAD1	glutamate decarboxylase GAD1	NAD(+)-dependent glutamate dehydrogenase; degrades glutamate to ammonia and alpha-ketoglutarate; expression sensitive to nitrogen catabolite repression and intracellular ammonia levels; genetically interacts with GDH3 by suppressing stress-induced apoptosis
	-0.645823422817641	CAGL0G05698g	GDH2	Ortholog(s) have glutamate dehydrogenase (NAD+) activity, role in nitrogen compound metabolic process and cytosol, mitochondrion localization	C2_07900W	GDH2	Putative NAD-specific glutamate dehydrogenase; fungal-specific; transcript regulated by Nrg1, Mig1, Tup1, and Gcn4; stationary phase enriched protein; flow model biofilm induced; Spider biofilm induced	YDL215C	GDH2	glutamate dehydrogenase (NAD(+))|GDHB|GDH-B	NAD(+)-dependent glutamate dehydrogenase; degrades glutamate to ammonia and alpha-ketoglutarate; expression sensitive to nitrogen catabolite repression and intracellular ammonia levels; genetically interacts with GDH3 by suppressing stress-induced apoptosis
	-0.758517993202566	CAGL0K00231g		Ortholog(s) have 5-oxoprolinase (ATP-hydrolyzing) activity, role in glutathione metabolic process and cytosol localization	C2_02990C	HYU1	Putative hydantoin utilization protein A; induced upon adherence to polystyrene; regulated by Gcn2p and Gcn4p	YKL215C	OXP1	5-oxoprolinase	5-oxoprolinase; enzyme is ATP-dependent and functions as a dimer; similar to mouse Oplah gene; green fluorescent protein (GFP)-fusion protein localizes to the cytoplasm; protein abundance increases in response to DNA replication stress
	-1.03493484776423	CAGL0L06094g	STR3	Putative cystathionine beta-lyase; gene is upregulated in azole-resistant strain	C2_00390C		Putative peroxisomal cystathionine beta-lyase; Gcn4p-regulated	YGL184C	STR3	cystathionine beta-lyase STR3	Peroxisomal cystathionine beta-lyase; converts cystathionine into homocysteine; may be redox regulated by Gto1p; involved in the release of the aromatic thiol 3-mercaptohexanol during wine fermentation
Unknown Function	0.966912677943075	CAGL0M11660g		Has domain(s) with predicted hydrolase activity
	0.61639231386692	CAGL0K09042g		Ortholog(s) have nucleus, ribosome localization	C1_09330W		Putative ribosome-associated protein; ortholog of S. cerevisiae Tma16; Hap43-induced gene; Spider biofilm induced	YOR252W	TMA16	RBF17	Protein of unknown function that associates with ribosomes
	0.541148781945454	CAGL0M01210g		Ortholog(s) have Rix1 complex, mitotic spindle pole body, nuclear heterochromatin localization
	0.611569554984392	CAGL0J11792g		Protein of unknown function
	0.607511777745155	CAGL0I10670g		Protein of unknown function
	0.56271751896753	CAGL0J11088g		Protein of unknown function
	0.544433074366292	CAGL0A00132g		Protein of unknown function
	0.541890676957949	CAGL0G01991g		Protein of unknown function
	1.11823405967812	CAGL0K01155g		Ortholog of S. cerevisiae : YGR079W and Saccharomyces cerevisiae S288C : YGR079W				YGR079W	YGR079W		Putative protein of unknown function; YGR079W is not an essential gene
	1.02768922103399	CAGL0C04785g		Ortholog of S. cerevisiae : YJR115W and Saccharomyces cerevisiae S288C : YJR115W				YJR115W	YJR115W		Putative protein of unknown function; YJR115W has a paralog, ECM13, that arose from the whole genome duplication
	0.709311880519872	CAGL0I03344g		Ortholog(s) have cytoplasmic stress granule, nucleolus localization	C1_08000W	NRP1	Ortholog(s) have cytoplasmic stress granule, nucleolus localization	YDL167C	NRP1		Putative RNA binding protein of unknown function; localizes to stress granules induced by glucose deprivation; predicted to be involved in ribosome biogenesis
	0.631096937340925	CAGL0G07018g		Ortholog(s) have Golgi apparatus, fungal-type vacuole membrane localization	C3_06420C		Ortholog(s) have Golgi apparatus, fungal-type vacuole membrane localization	YML018C	YML018C		Protein of unknown function; green fluorescent protein (GFP)-fusion protein localizes to the membrane of the vacuole; physical interaction with Atg27p suggests a possible role in autophagy; YML018C is not an essential gene; relative distribution to the vacuolar membrane decreases upon DNA replication stress; YML018C has a paralog, THI74, that arose from the whole genome duplication
	0.628827283641828	CAGL0H01947g		Ortholog(s) have cytoplasm, nucleus localization	CR_03980W		Protein of unknown function; rat catheter and Spider biofilm induced	YJR056C	YJR056C		Protein of unknown function; green fluorescent protein (GFP)-fusion protein localizes to both the cytoplasm and the nucleus; relative distribution to the nucleus increases upon DNA replication stress
	0.605463418693547	CAGL0L07832g		Ortholog(s) have nucleolus localization	C3_07600W		Ortholog(s) have nucleolus localization	YCR016W	YCR016W		Putative protein of unknown function; green fluorescent protein (GFP)-fusion protein localizes to the nucleolus and nucleus; predicted to be involved in ribosome biogenesis
	0.602373734494608	CAGL0F01177g		Ortholog of S. cerevisiae : YOL036W and Saccharomyces cerevisiae S288C : YOL036W				YOL036W	YOL036W		Protein of unknown function; potential Cdc28p substrate; YOL036W has a paralog, YIR016W, that arose from the whole genome duplication
	0.582342623563035	CAGL0G02013g		Ortholog(s) have cytosol, nucleus localization	C2_04960C		Protein of unknown function; Spider biofilm induced	YKR074W	AIM29		Protein of unknown function; epitope-tagged protein localizes to the cytoplasm; YKR074W is not an essential gene; null mutant displays elevated frequency of mitochondrial genome loss
	0.574059975259491	CAGL0I08547g		Ortholog(s) have cytosol, nucleus localization	C1_01910W		Protein of unknown function; present in exponential and stationary growth phase yeast cultures	YER156C	YER156C		Putative protein of unknown function; interacts with Hsp82p and copurifies with Ipl1p; expression is copper responsive and downregulated in strains deleted for MAC1, a copper-responsive transcription factor; similarity to mammalian MYG1
	0.515293448053122	CAGL0G08778g		Ortholog(s) have nucleolus localization	C3_01430W		Protein of unknown function; Spider biofilm induced	YIL127C	RRT14		Putative protein of unknown function; identified in a screen for mutants with decreased levels of rDNA transcription; green fluorescent protein (GFP)-fusion protein localizes to the nucleolus; predicted to be involved in ribosome biogenesis
	0.511718295179055	CAGL0K11319g		Ortholog of S. cerevisiae : YDR249C and Saccharomyces cerevisiae S288C : YDR249C				YDR249C	YDR249C		Putative protein of unknown function
	0.571471299968579	CAGL0F06523g		Ortholog(s) have nucleolus localization
	0.667645260113969	CAGL0M05775g		Ortholog(s) have cytosol, nucleolus localization
	0.614724761938136	CAGL0K12804g		Ortholog(s) have nucleolus localization
	0.613170075941201	CAGL0L04950g		Ortholog(s) have nucleolus localization
	0.606797772172272	CAGL0D03124g		Ortholog(s) have nucleolus localization
	0.565769663503578	CAGL0G00484g		Ortholog(s) have nucleolus localization
	0.561547615007928	CAGL0J02222g		Ortholog(s) have nucleolus localization
	0.658871876163125	CAGL0K02387g		Ortholog(s) have cytosol localization
	0.633253938702755	CAGL0J10912g		Ortholog(s) have cytosol, nucleus localization
	0.529985893383466	CAGL0D03454g		Has domain(s) with predicted GTP binding activity
	-0.504552668268948	CAGL0K04708g		Protein of unknown function
	-0.505336936371964	CAGL0K01771g		Has domain(s) with predicted transferase activity, transferring acyl groups activity
	-0.50776045711299	CAGL0E06512g		Ortholog(s) have cytoplasm localization	C4_04430W	MRP8	Mitochondrial ribosomal protein; ortholog of S. cerevisiae Mrp8; transcript induced in hyphal form; mutant is viable; flow model and rat catheter biofilm repressed	YKL142W	MRP8	YKL3	Protein of unknown function; undergoes sumoylation; transcription induced under cell wall stress; protein levels are reduced under anaerobic conditions; protein abundance increases in response to DNA replication stress; originally thought to be a mitochondrial ribosomal protein based on sequence analysis
	-0.508606289743653	CAGL0I01276g		Ortholog(s) have cytoplasm, nucleus localization	CR_09010C		Putative cystathionine gamma-synthase; decreased levels in stationary phase cultures; Hog1p-induced; Gcn4p-regulated	YHR112C	YHR112C	putative cystathionine beta-lyase	Protein of unknown function; localizes to the cytoplasm and nucleus; overexpression affects protein trafficking through the endocytic pathway
	-0.513144232432255	CAGL0K10879g		Protein of unknown function
	-0.518492012986167	CAGL0M12969g		Ortholog(s) have mitochondrion localization	C5_00090C		Predicted ORF from Assembly 19; removed from Assembly 20; subsequently reinstated in Assembly 21 based on comparative genome analysis	YIL077C	YIL077C		Putative protein of unknown function; the authentic, non-tagged protein is detected in highly purified mitochondria in high-throughput studies; deletion confers sensitivity to 4-(N-(S-glutathionylacetyl)amino) phenylarsenoxide (GSAO)
	-0.522925093402042	CAGL0F04521g		Ortholog of S. cerevisiae : ECM13 and Saccharomyces cerevisiae S288C : YBL043W				YBL043W	ECM13		Non-essential protein of unknown function; induced by treatment with 8-methoxypsoralen and UVA irradiation; ECM13 has a paralog, YJR115W, that arose from the whole genome duplication
	-0.526935099681287	CAGL0I10224g		Protein of unknown function
	-0.547873536115551	CAGL0J06270g		Ortholog of S. cerevisiae : YDL176W and Saccharomyces cerevisiae S288C : YDL176W				YDL176W	YDL176W		Protein of unknown function; predicted by computational methods to be involved in fructose-1,6-bisphosphatase (Fbp1p) degradation; interacts with components of the GID complex; YDL176W is not an essential gene
	-0.551931259066417	CAGL0K09218g		Ortholog(s) have role in regulation of cell size and endoplasmic reticulum localization	C1_10360C		Putative protein of unknown function; Hap43p-repressed gene; increased transcription is observed upon fluphenazine treatment; possibly transcriptionally regulated by Tac1p; induced by nitric oxide; fungal-specific (no human/murine homolog	YCR061W	YCR061W	YCR062W	Protein of unknown function; green fluorescent protein (GFP)-fusion protein localizes to the cytoplasm in a punctate pattern; induced by treatment with 8-methoxypsoralen and UVA irradiation
	-0.553271111794752	CAGL0F07975g		Ortholog(s) have cytoplasm localization	C5_04960W		Protein of unknown function; induced in core caspofungin response; induced in ssr1 mutant; induced by nitric oxide independent of Yhb1; Spider biofilm induced	YGR237C	YGR237C		Putative protein of unknown function; green fluorescent protein (GFP)-fusion protein localizes to the cytoplasm
	-0.561536018154095	CAGL0D00990g		Ortholog of S. cerevisiae : YDL057W, C. albicans SC5314 : C5_00750C_A, C. dubliniensis CD36 : Cd36_50730, C. parapsilosis CDC317 : CPAR2_501760 and Candida tenuis NRRL Y-1498 : CANTEDRAFT_127559	C5_00750C		Predicted protein tyrosine phosphatase; rat catheter biofilm induced	YDL057W	YDL057W		Putative protein of unknown function; YDL057W is not an essential gene
	-0.570446240163224	CAGL0L00205g		Protein of unknown function
	-0.571466391493366	CAGL0K03575g		Ortholog(s) have cytoplasm, nucleus, ribosome localization	C1_03270W		Putative protein of unknown function; Hap43-repressed gene; Spider biofilm induced	YMR114C	YMR114C	putative peptide hydrolase	Protein of unknown function; may interact with ribosomes, based on co-purification experiments; green fluorescent protein (GFP)-fusion protein localizes to the nucleus and cytoplasm; YMR114C is not an essential gene
	-0.576537330002702	CAGL0K10824g		Ortholog of S. cerevisiae : YLR149C, C. albicans SC5314 : C7_03280C_A, C. dubliniensis CD36 : Cd36_72930, C. parapsilosis CDC317 : CPAR2_704080 and Candida tenuis NRRL Y-1498 : CANTEDRAFT_112372	C7_03280C		Protein of unknown function; induced by ketoconazole; Spider, F-12/CO2 and flow model biofilm induced	YLR149C	YLR149C		Protein of unknown function; overexpression causes a cell cycle delay or arrest; null mutation results in a decrease in plasma membrane electron transport; YLR149C is not an essential gene; protein abundance increases in response to DNA replication stress
	-0.585731062399802	CAGL0G10197g		Protein of unknown function
	-0.587208418234816	CAGL0K05687g		Ortholog(s) have cytosol, nucleus localization
	-0.595729663558327	CAGL0M00616g		Ortholog(s) have role in protein targeting to vacuole and endoplasmic reticulum localization	C7_00170W	VPS70	Ortholog(s) have role in protein targeting to vacuole and endoplasmic reticulum localization	YJR126C	VPS70	putative zinc metalloprotease	Protein of unknown function involved in vacuolar protein sorting; SWAT-GFP and mCherry fusion proteins localize to the endoplasmic reticulum
	-0.603713331462929	CAGL0L00473g		Ortholog of S. cerevisiae : YMR187C and Saccharomyces cerevisiae S288C : YMR187C				YMR187C	YMR187C		Putative protein of unknown function; YMR187C is not an essential gene
	-0.610138733742126	CAGL0H00418g		Protein of unknown function
	-0.635976672041095	CAGL0I00550g		Ortholog(s) have fungal-type vacuole membrane, nucleus localization				YLR297W	YLR297W		Protein of unknown function; green fluorescent protein (GFP)-fusion protein localizes to the vacuole; not an essential gene; induced by treatment with 8-methoxypsoralen and UVA irradiation; relocalizes from nucleus to vacuole upon DNA replication stress; YLR297W has a paralog, YOR186W, that arose from the whole genome duplication
	-0.659430779876405	CAGL0K00891g		Ortholog(s) have ATP binding activity and cytosol, nucleus localization	CR_09500C		Ortholog(s) have ATP binding activity and cytosol, nucleus localization	YGR205W	TDA10	putative ATP-dependent kinase	ATP-binding protein of unknown function; crystal structure resembles that of E.coli pantothenate kinase and other small kinases; null mutant is sensitive to expression of the top1-T722A allele
	-0.672484265276148	CAGL0L00957g		Protein of unknown function
	-0.673291707707677	CAGL0L06864g		Putative protein related to ECM3; gene is downregulated in azole-resistant strain
	-0.688770314023371	CAGL0B01078g		Putative protein; gene is upregulated in azole-resistant strain				YLR177W	YLR177W		Putative protein of unknown function; phosphorylated by Dbf2p-Mob1p in vitro; some strains contain microsatellite polymophisms at this locus; not an essential gene; YLR177W has a paralog, PSP1, that arose from the whole genome duplication
	-0.711864071233974	CAGL0L10582g		Ortholog(s) have cytoplasm localization	C3_03410C		Putative glycoside hydrolase; stationary phase enriched protein; Hog1p-downregulated; shows colony morphology-related gene regulation by Ssn6p	YMR196W	YMR196W		Putative protein of unknown function; green fluorescent protein (GFP)-fusion protein localizes to the cytoplasm; YMR196W is not an essential gene
	-0.719744131958917	CAGL0G05357g		Ortholog(s) have cytosol, nucleus localization
	-0.722787175484563	CAGL0D01474g		Protein of unknown function
	-0.734805344046522	CAGL0F04697g		Ortholog(s) have cytoplasm localization				YLR257W	YLR257W		Protein of unknown function; protein abundance increases in response to DNA replication stress
	-0.745397925112031	CAGL0G04829g		Protein of unknown function
	-0.764605756988141	CAGL0H03289g		Ortholog(s) have cytoplasm, nucleus, plasma membrane localization				YGL082W	YGL082W		Putative protein of unknown function; predicted prenylation/proteolysis target of Afc1p and Rce1p; green fluorescent protein (GFP)-fusion protein localizes to the cytoplasm and nucleus; not an essential gene; YGL082W has a paralog, YPL191C, that arose from the whole genome duplication
	-0.774999474819841	CAGL0K04719g		Ortholog(s) have mitochondrion, ribosome localization	C3_05710W	RCT1	Fluconazole-induced protein; Ras1, Cyr1 repressed and Efg1 induced; regulated by Nrg1, Tup1, Tbf1, Ssn6; induced in oralpharyngeal candidasis; rat catheter biofilm repressed	YNL208W	YNL208W		Protein of unknown function; may interact with ribosomes, based on co-purification experiments; authentic, non-tagged protein is detected in purified mitochondria in high-throughput studies; potential orthologs found in other fungi
	-0.780636979694801	CAGL0H02563g		Predicted GPI-linked protein				YMR251W-A	HOR7		Protein of unknown function; overexpression suppresses Ca2+ sensitivity of mutants lacking inositol phosphorylceramide mannosyltransferases Csg1p and Csh1p; transcription is induced under hyperosmotic stress and repressed by alpha factor; HOR7 has a paralog, DDR2, that arose from the whole genome duplication
	-0.815582306447365	CAGL0C04587g		Ortholog(s) have mitochondrion localization				YJR098C	YJR098C		Putative protein of unknown function; the authentic, non-tagged protein is detected in highly purified mitochondria in high-throughput studies
	-0.881005519015649	CAGL0B01595g		Protein of unknown function
	-0.918390143858114	CAGL0A02002g		Ortholog of S. cerevisiae : YOL024W and Saccharomyces cerevisiae S288C : YOL024W				YOL024W	YOL024W		Putative protein of unknown function; predicted to have thiol-disulfide oxidoreductase active site; YOL024W has a paralog, IGD1, that arose from the whole genome duplication
	-1.0191634433222	CAGL0K07678g		Protein of unknown function
	-1.15588310517036	CAGL0M11000g		Ortholog(s) have cytosol localization				YNR034W-A	YNR034W-A		Protein of unknown function; expression is regulated by Msn2p/Msn4p; YNR034W-A has a paralog, YCR075W-A, that arose from the whole genome duplication
	-1.19386776056198	CAGL0M14025g		Ortholog(s) have nucleus localization
	-1.59240067365892	CAGL0L13288g		Protein of unknown function
